# Supplementary material for: Phenyl trimethyl ammonium tribromide mediated robust one-pot synthesis of spiro-oxacycles – an economic route – stereoselective synthesis of oxaspirohexacyclodieneones
Source: Royal Society of Chemistry journal article supplement (doi:10.1039/c6ob01116k), 2016-01-01

## Supporting information

### Phenyl Trimethyl Ammonium Tribromide Mediated Robust One-pot Synthesis of Spiro-oxacycles – An Economic Way Out – Stereoselective Synthesis of Oxaspirohexacyclodieneones

Debayan Sarkar\*, Manoj Kumar Ghosh, Nilendri Rout

#### CONTENTS

|                                                                 |     |
|-----------------------------------------------------------------|-----|
| 1. Materials and Methods -                                      | S2  |
| 2. $^1\text{H}$ & $^{13}\text{C}$ NMR Spectra of final products | S3  |
| 3. NOE Experimental spectra                                     | S40 |
| 4. $^1\text{H}$ & $^{13}\text{C}$ NMR Spectra of substrates     | S47 |

## 1. Materials & Methods-

All reactions were performed under nitrogen atmosphere using oven dried glass wires. All solvents are used in dried condition. THF was first dried over potassium carbonate then by metallic sodium with benzophenone. Diethyl ether also dried over metallic sodium with benzophenone. Anhydrous sodium sulphate was used for drying reaction mixture after aqueous workup.

TLC was performed with .25mm coated commercial silica gel plates (DC-kiesel gel 60 F<sub>254</sub>) and stain by Iodine, vanillin solution. Chromatographic separation was done by using (200-400mesh) silica gel. NMR chemical shift value are reported in ( $\delta$ ppm) .TMS taken as internal standard for <sup>1</sup>H the residual signal for CDCl<sub>3</sub> taken as 7.28 ppm & for <sup>13</sup>C 77.00ppm. <sup>1</sup>H spectral data reported as  $\delta$  (multiplicity, Coupling constant, integration). Multiplicity reported as follows, s = singlet, d = doublet, t =triplet, q = quartet, m = multiplet, dd = doublet of a doublet, td = triplate of a doublet. HRMS (High resolution Mass Spectra) was measured in a Q-TOF I (quadrupolehexapole-TOF) mass spectrometer with an orthogonal Z-spray-electrospray interface on micro mass spectrometer. IR spectra were recorded using thin film deposit on NaCl & absorption frequency reported in cm<sup>-1</sup>.

### List of Abbreviations:

THF= Tetrahydrofuran,

EtOAc= Ethyl acetate

TLC= Thin layer chromatography

DCM = Dichloro methane

DIBAL- Diisobutyl aluminium hydride

MeI-Methyl Iodide

BnBr-Benzyl Bromide

LiAlH- lithium Aluminium Hydride

# 1-bromo-1-ethylnaphthalen-2(1H)-one (2a)

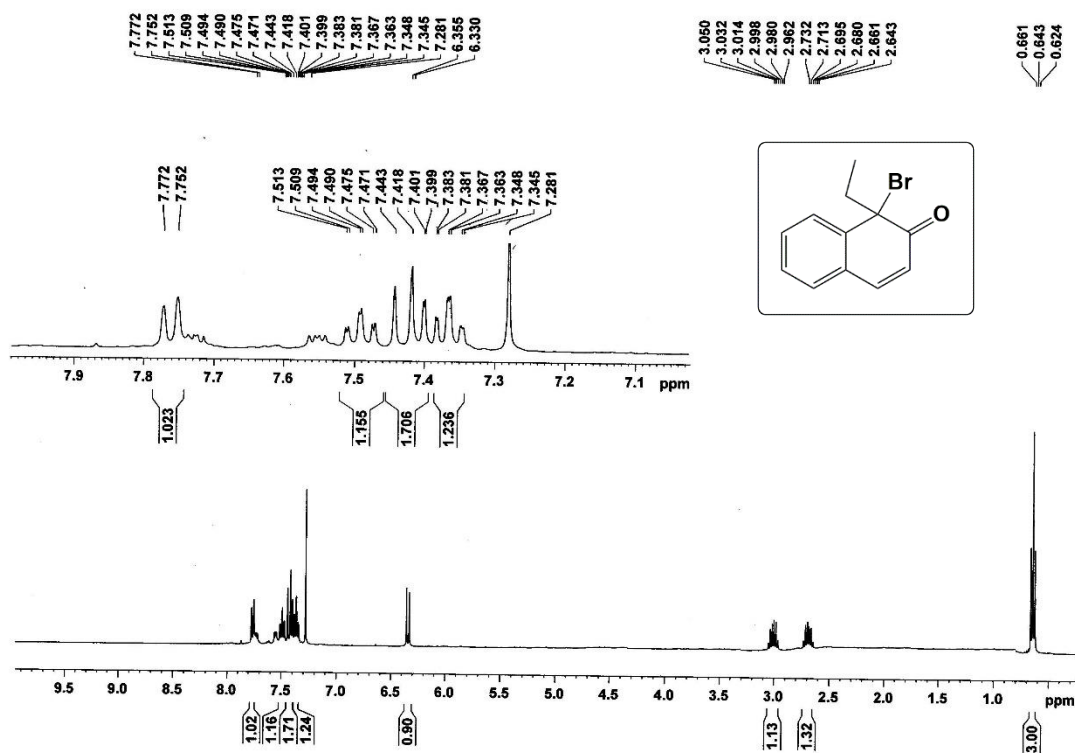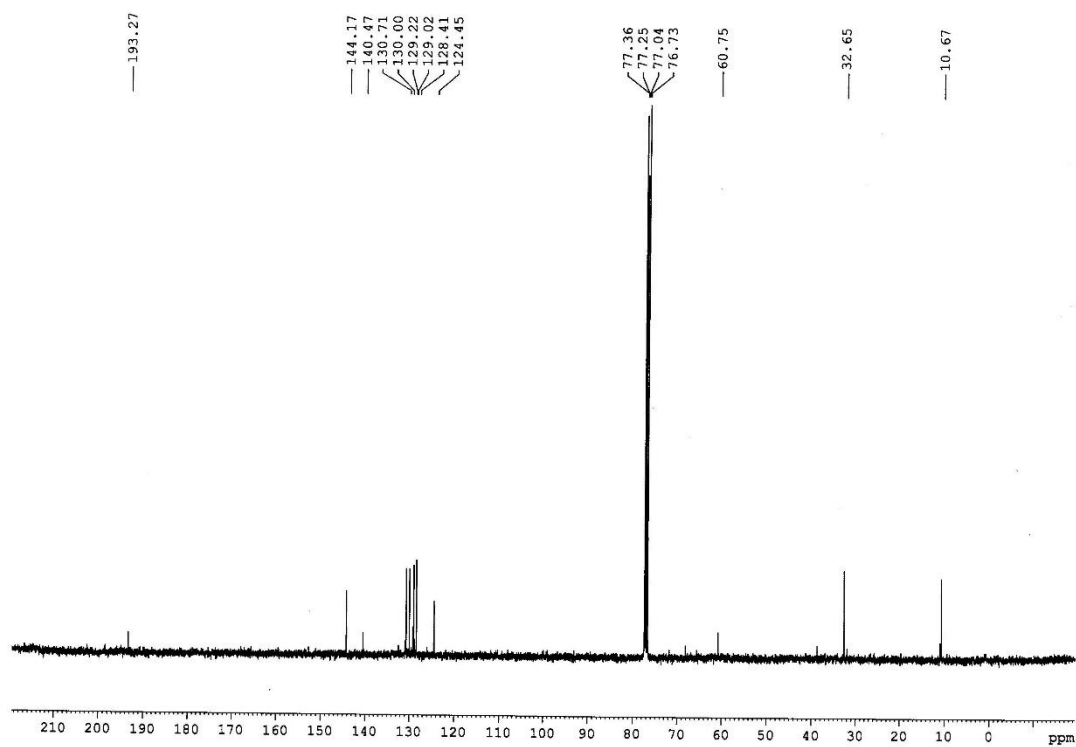

# 1-bromo-1-propylnaphthalen-2(1H)-one (2b)

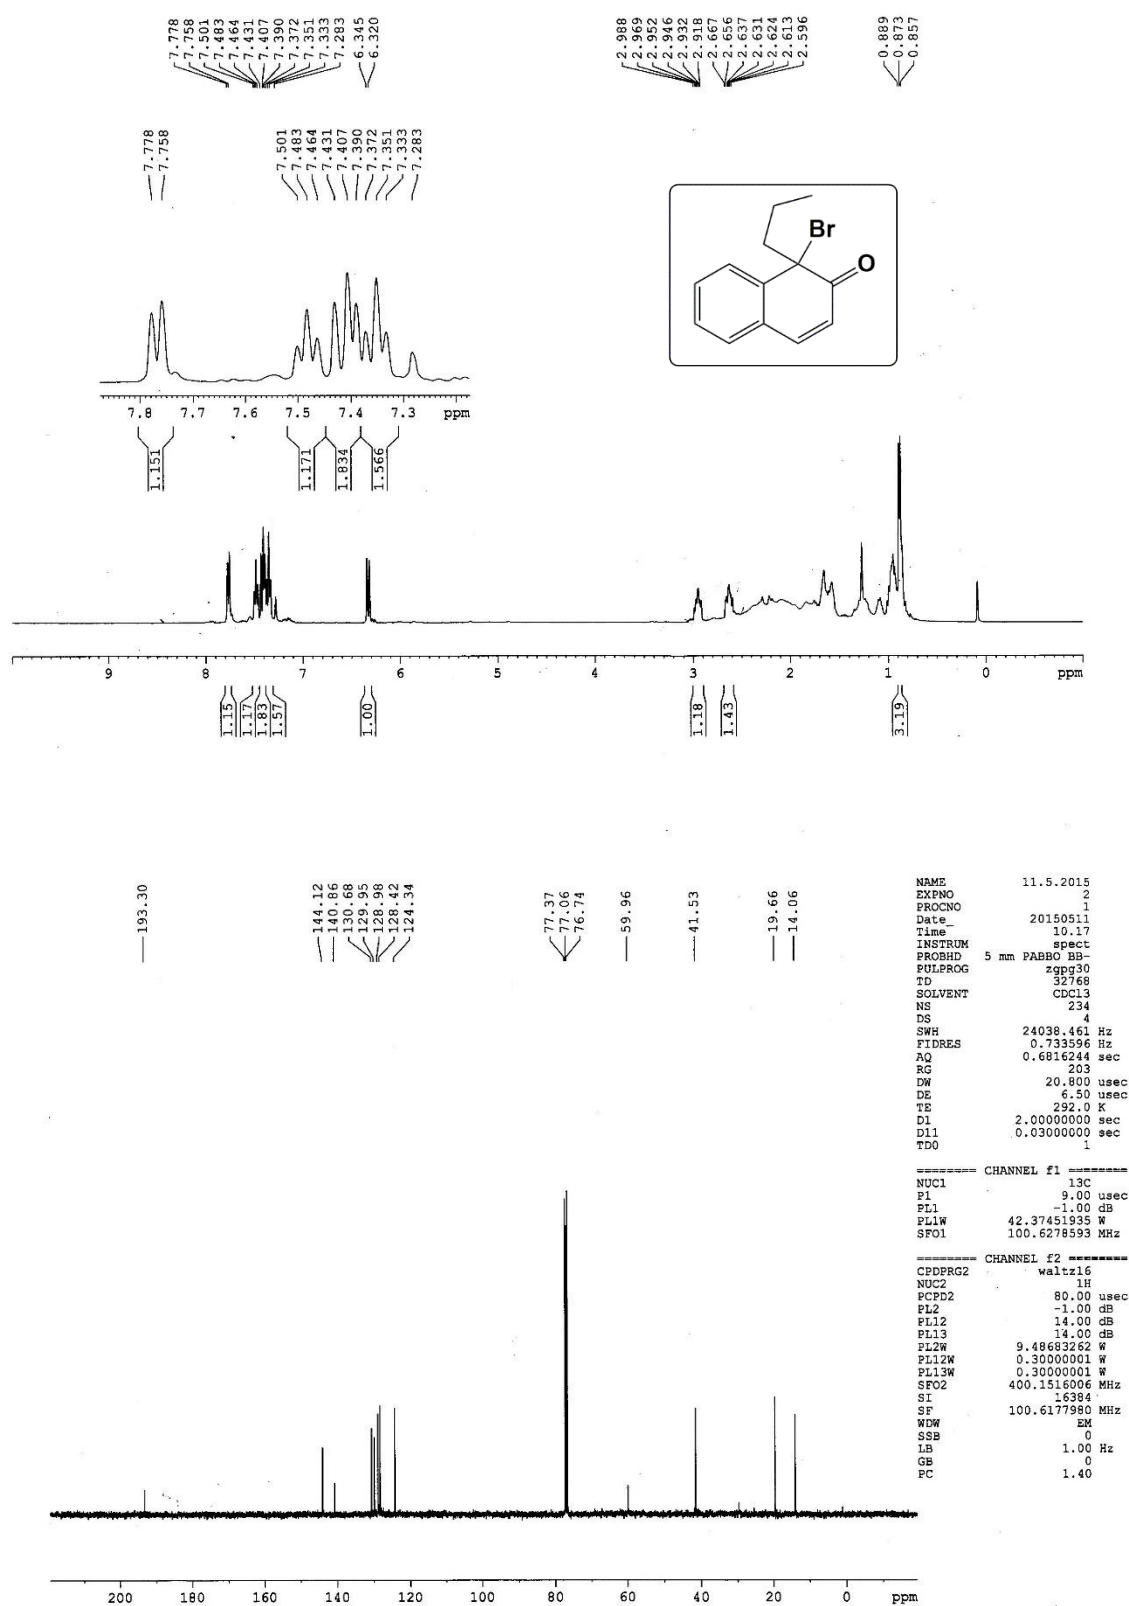



# DEPT-90 & DEPT-135 of 1-bromo-1-propylnaphthalen-2(1H)-one (2b)

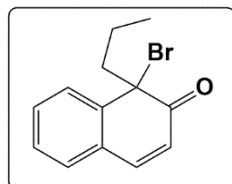

DEPT-90 of DS-Bpr-PTAB

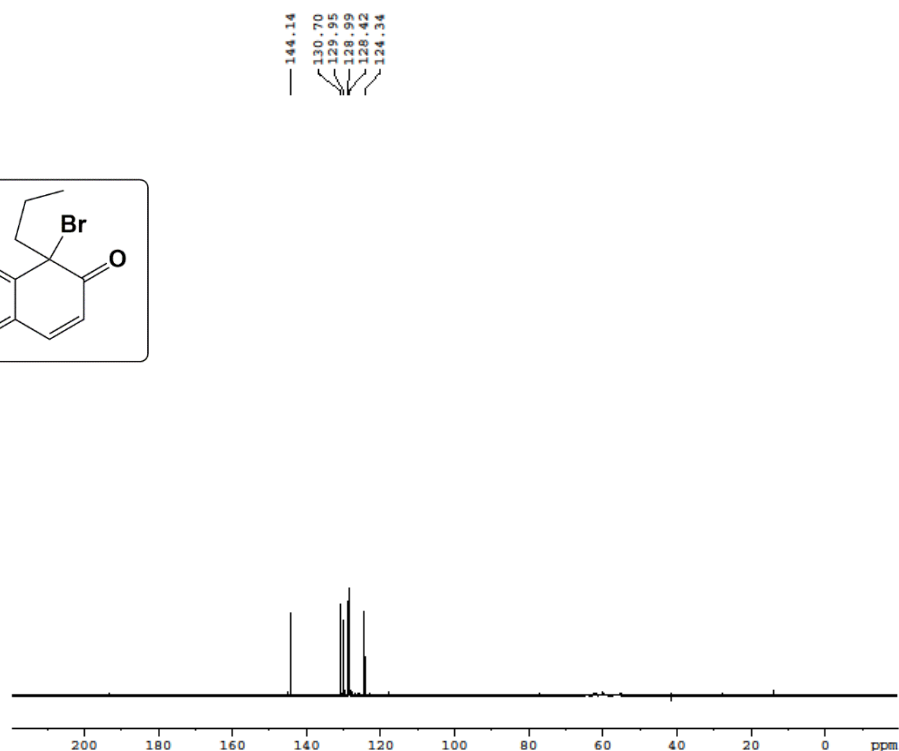

```

NAME      11.5.2015
EXPNO     10
PROCNO     1
Date_     20150512
Time      0.46
INSTRUM    spect
PROBHD     5 mm PABBO BB-
PULPROG    dept90
TD         32768
SOLVENT    CDCl3
NS         1000
DS         2
SWH        24038.461 Hz
FIDRES     0.733596 Hz
AQ         0.6816244 sec
RG         203
DW         20.800 usec
DE         6.50 usec
TE         291.5 K
CNST2     145.0000000
D1         2.00000000 sec
D2         0.00344828 sec
D12        0.00002000 sec
TD0        1

----- CHANNEL f1 -----
NUC1       13C
P1         9.00 usec
P2         18.00 usec
PL1        -1.00 dB
PL1W       42.37451935 W
SFO1       100.6278593 MHz

----- CHANNEL f2 -----
CPDPRG2    waltz16
NUC2       1H
P3         14.50 usec
P4         29.00 usec
PCPD2      80.00 usec
PL2        -1.00 dB
PL12       14.00 dB
PL2W       9.48683262 W
PL12W      0.30000001 W
SFO2       400.1516006 MHz
SI         16384
SF         100.6177980 MHz
WDW        EM
SSB        0
LB         1.00 Hz
GB         0
PC         1.40
    
```

DEPT-135 of DS-BPr-PTAB

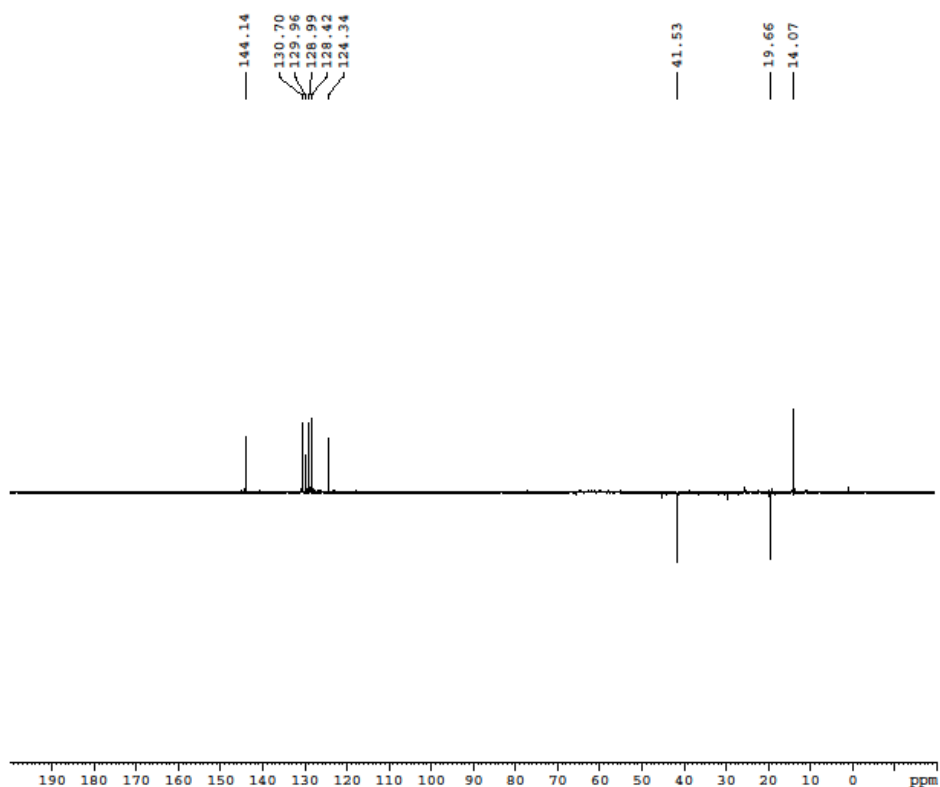

```

NAME      11.5.2015
EXPNO     11
PROCNO     1
Date_     20150512
Time      1.32
INSTRUM    spect
PROBHD     5 mm PABBO BB-
PULPROG    dept135
TD         32768
SOLVENT    CDCl3
NS         1000
DS         2
SWH        24038.461 Hz
FIDRES     0.733596 Hz
AQ         0.6816244 sec
RG         203
DW         20.800 usec
DE         6.50 usec
TE         291.3 K
CNST2     145.0000000
D1         2.00000000 sec
D2         0.00344828 sec
D12        0.00002000 sec
TD0        1

----- CHANNEL f1 -----
NUC1       13C
P1         9.00 usec
P2         18.00 usec
PL1        -1.00 dB
PL1W       42.37451935 W
SFO1       100.6278593 MHz

----- CHANNEL f2 -----
CPDPRG2    waltz16
NUC2       1H
P3         14.50 usec
P4         29.00 usec
PCPD2      80.00 usec
PL2        -1.00 dB
PL12       14.00 dB
PL2W       9.48683262 W
PL12W      0.30000001 W
SFO2       400.1516006 MHz
SI         16384
SF         100.6177980 MHz
WDW        EM
SSB        0
LB         1.00 Hz
GB         0
PC         1.40
    
```

1-bromo-1-pentyl-naphthalen-2(1H)-one (2c)

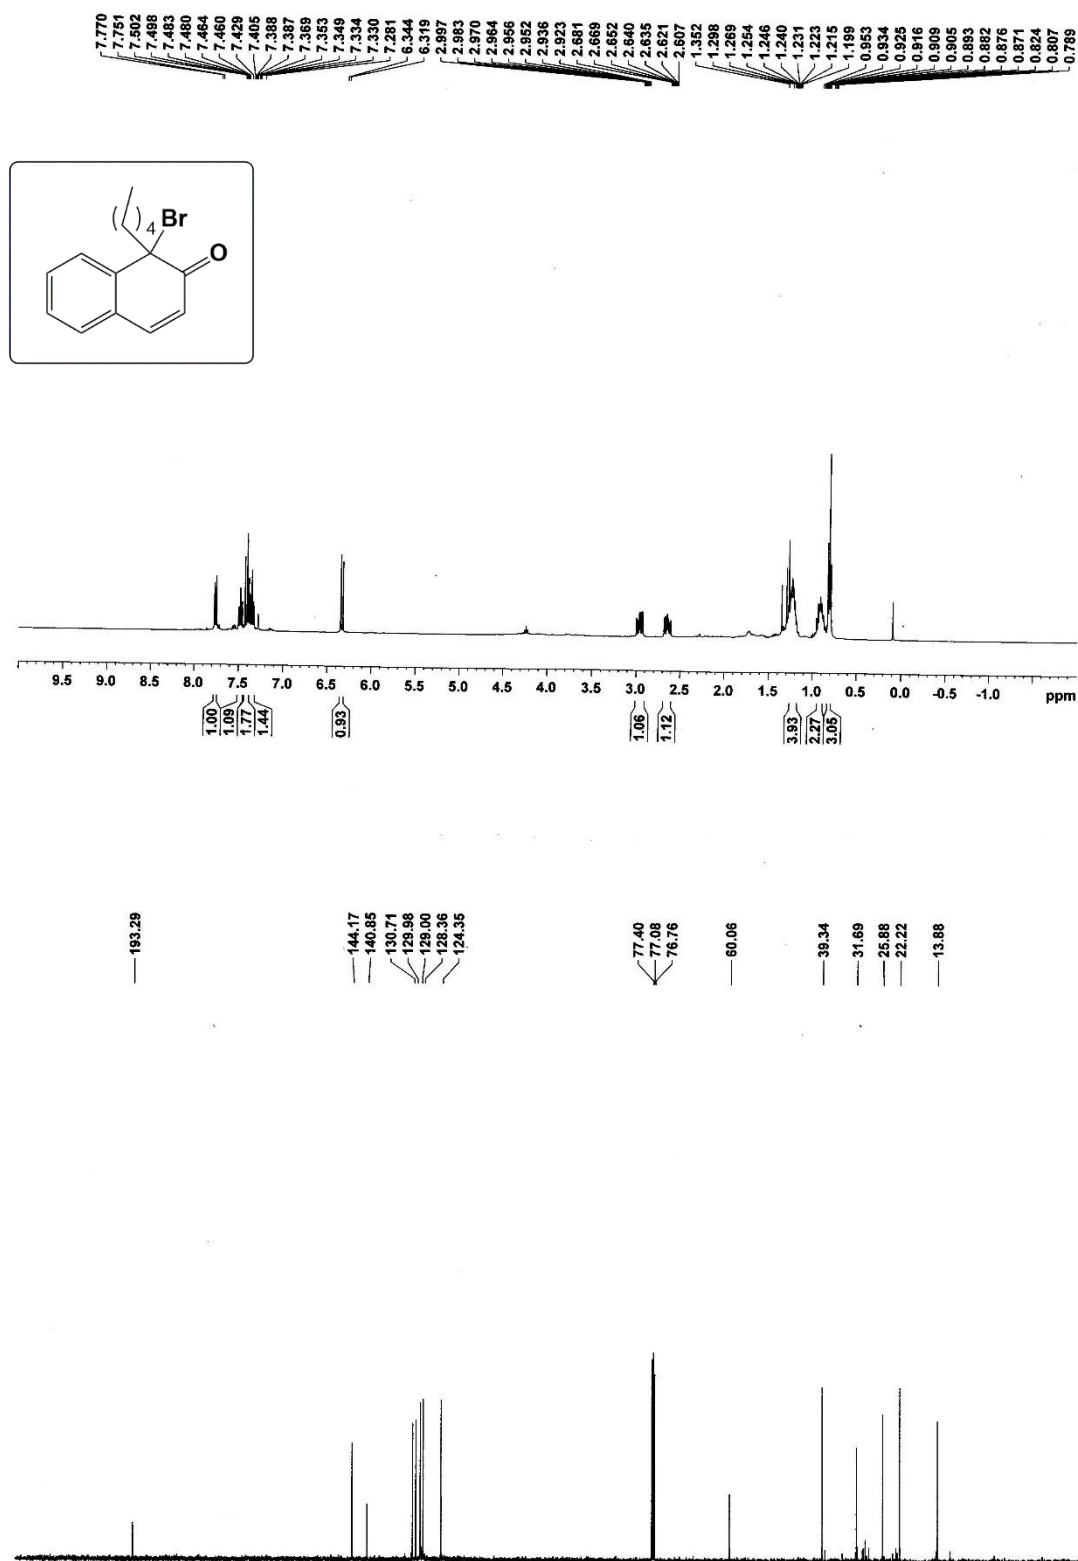

1-benzyl-1-bromonaphthalen-2(1H)-one(2d)

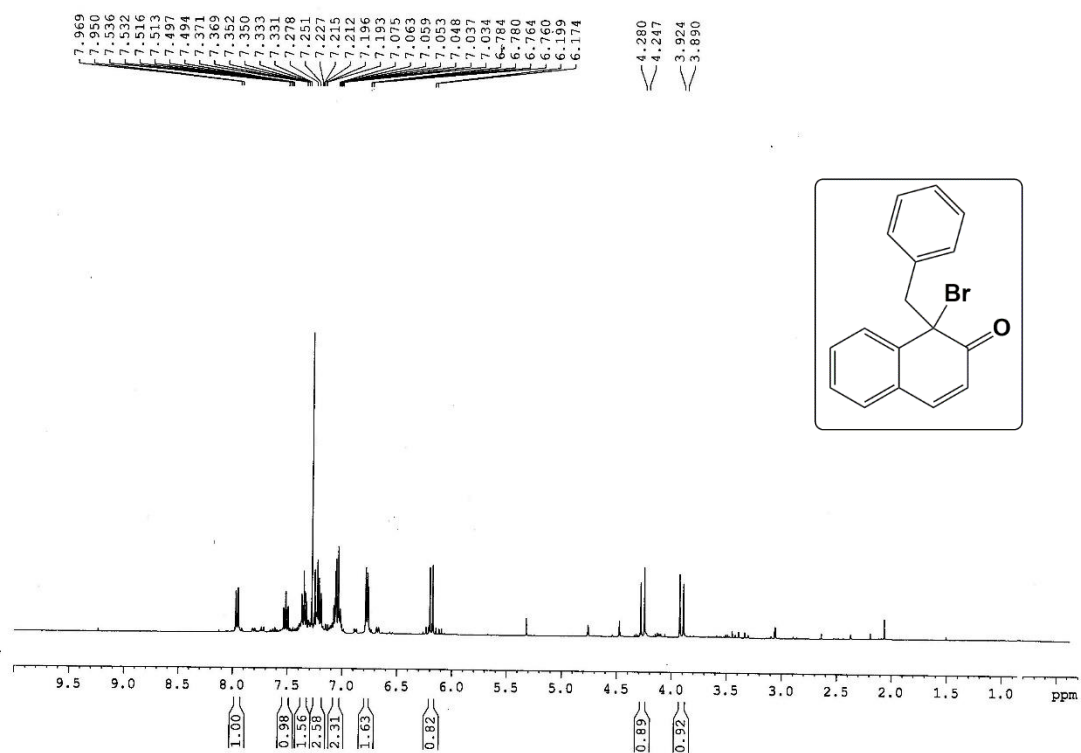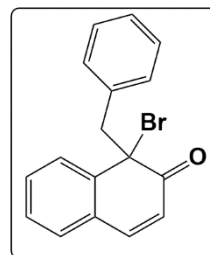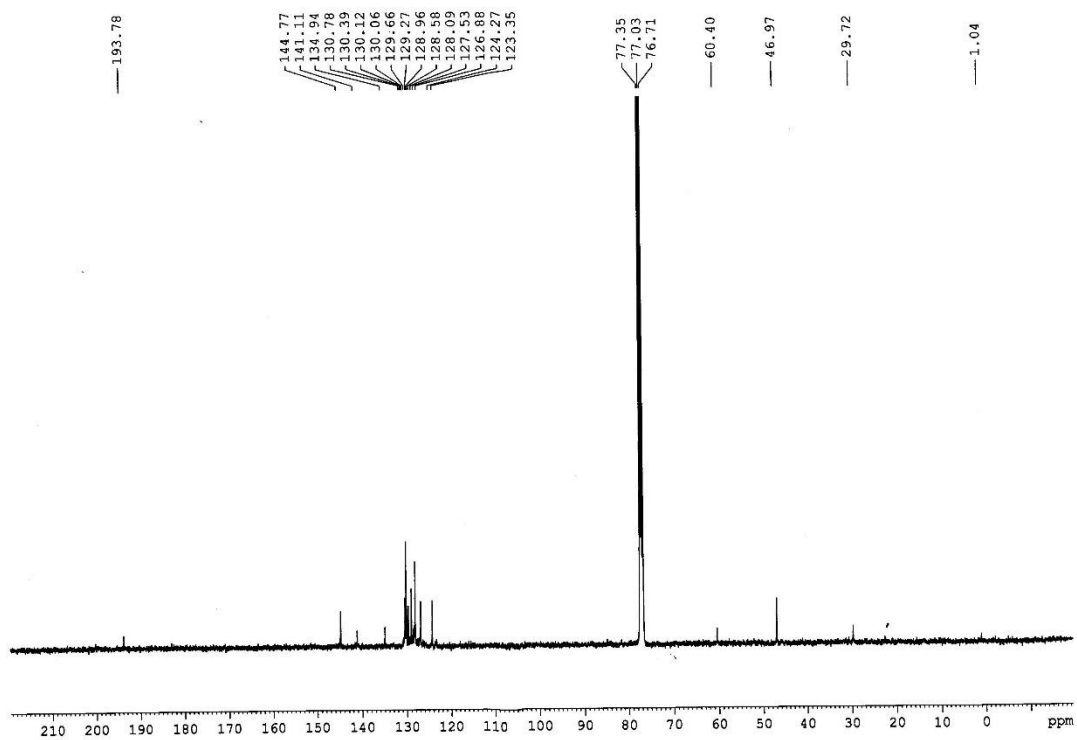

1-bromo-1-phenethylnaphthalen-2(1H)-one (2e)

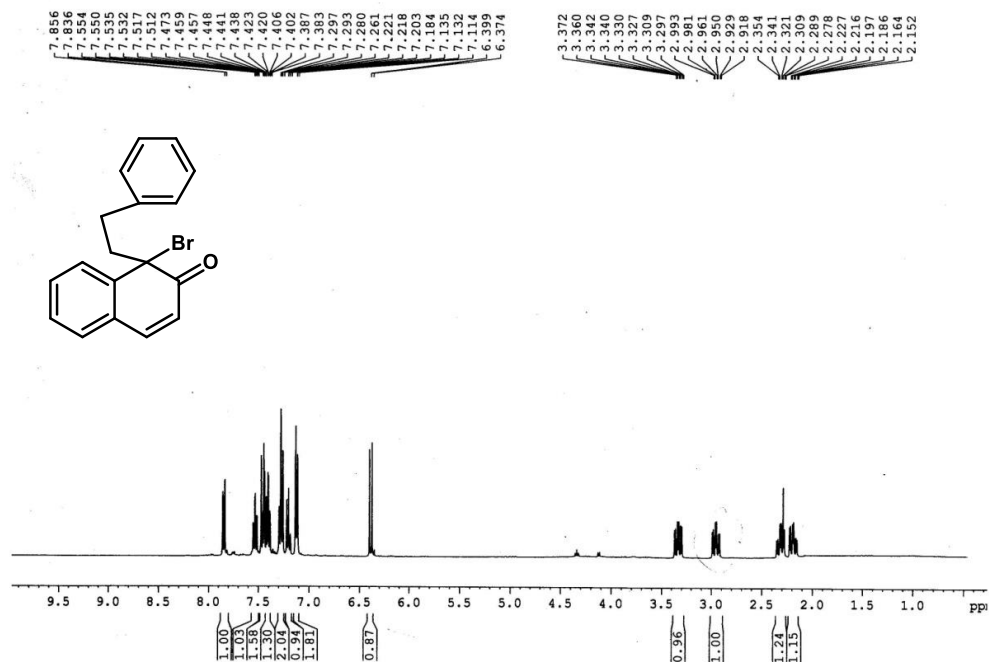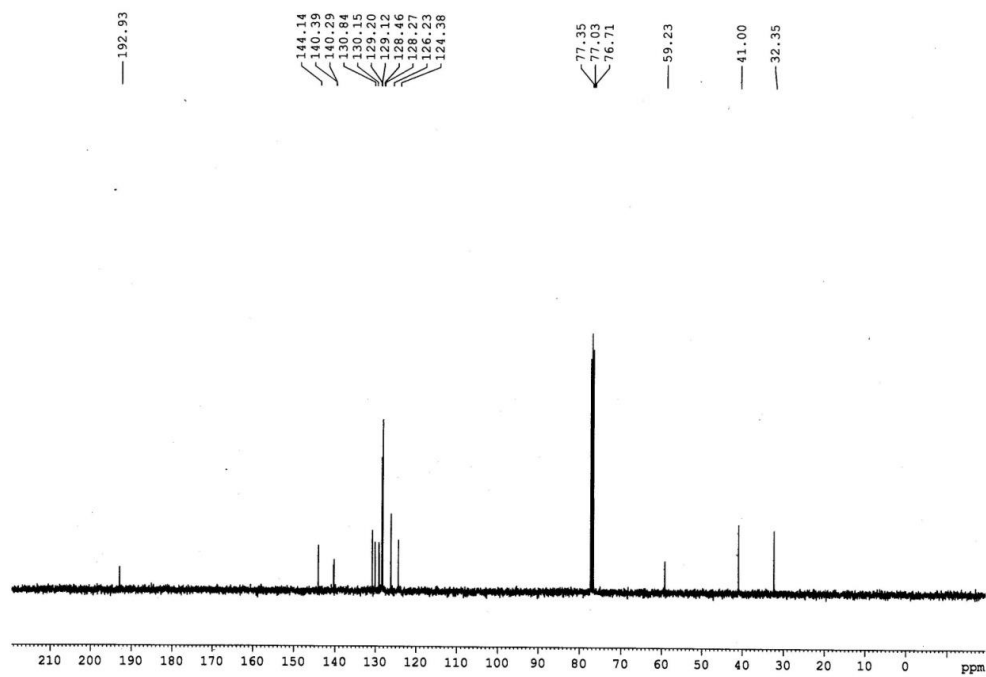

1-bromo-1-(4-methylphenethyl)naphthalene-2(1H)-one (2f)

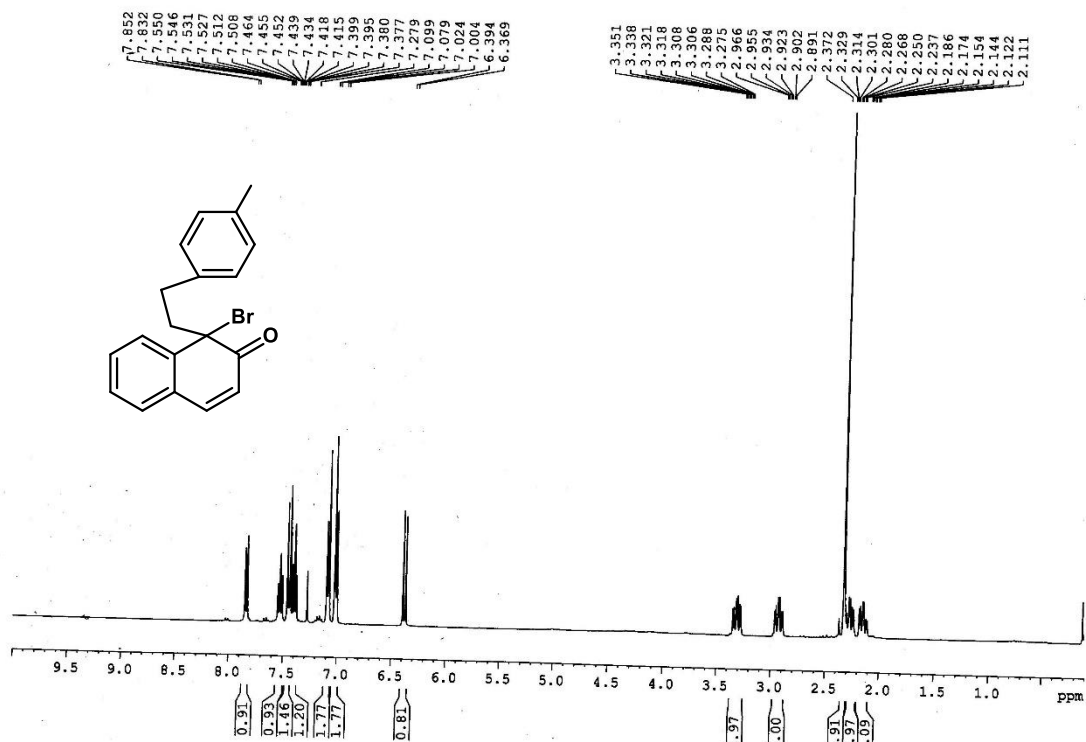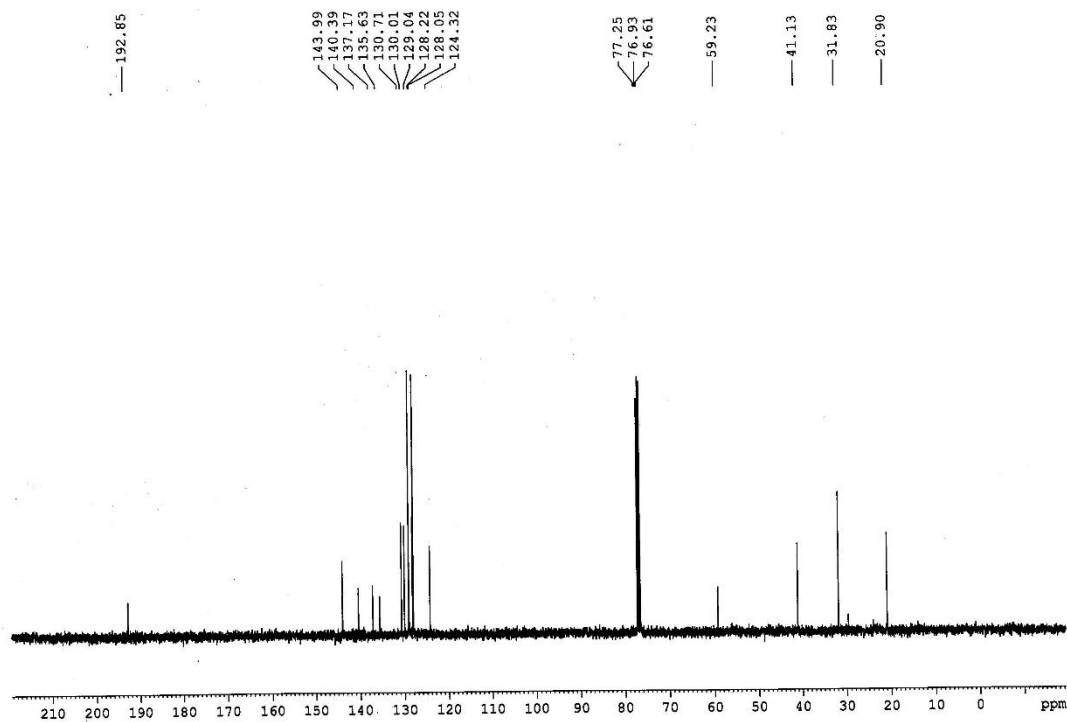

4, 5-dihydro-2'H, 3H-spiro [furan-2, 1'-naphthalen]-2'-one (4a)

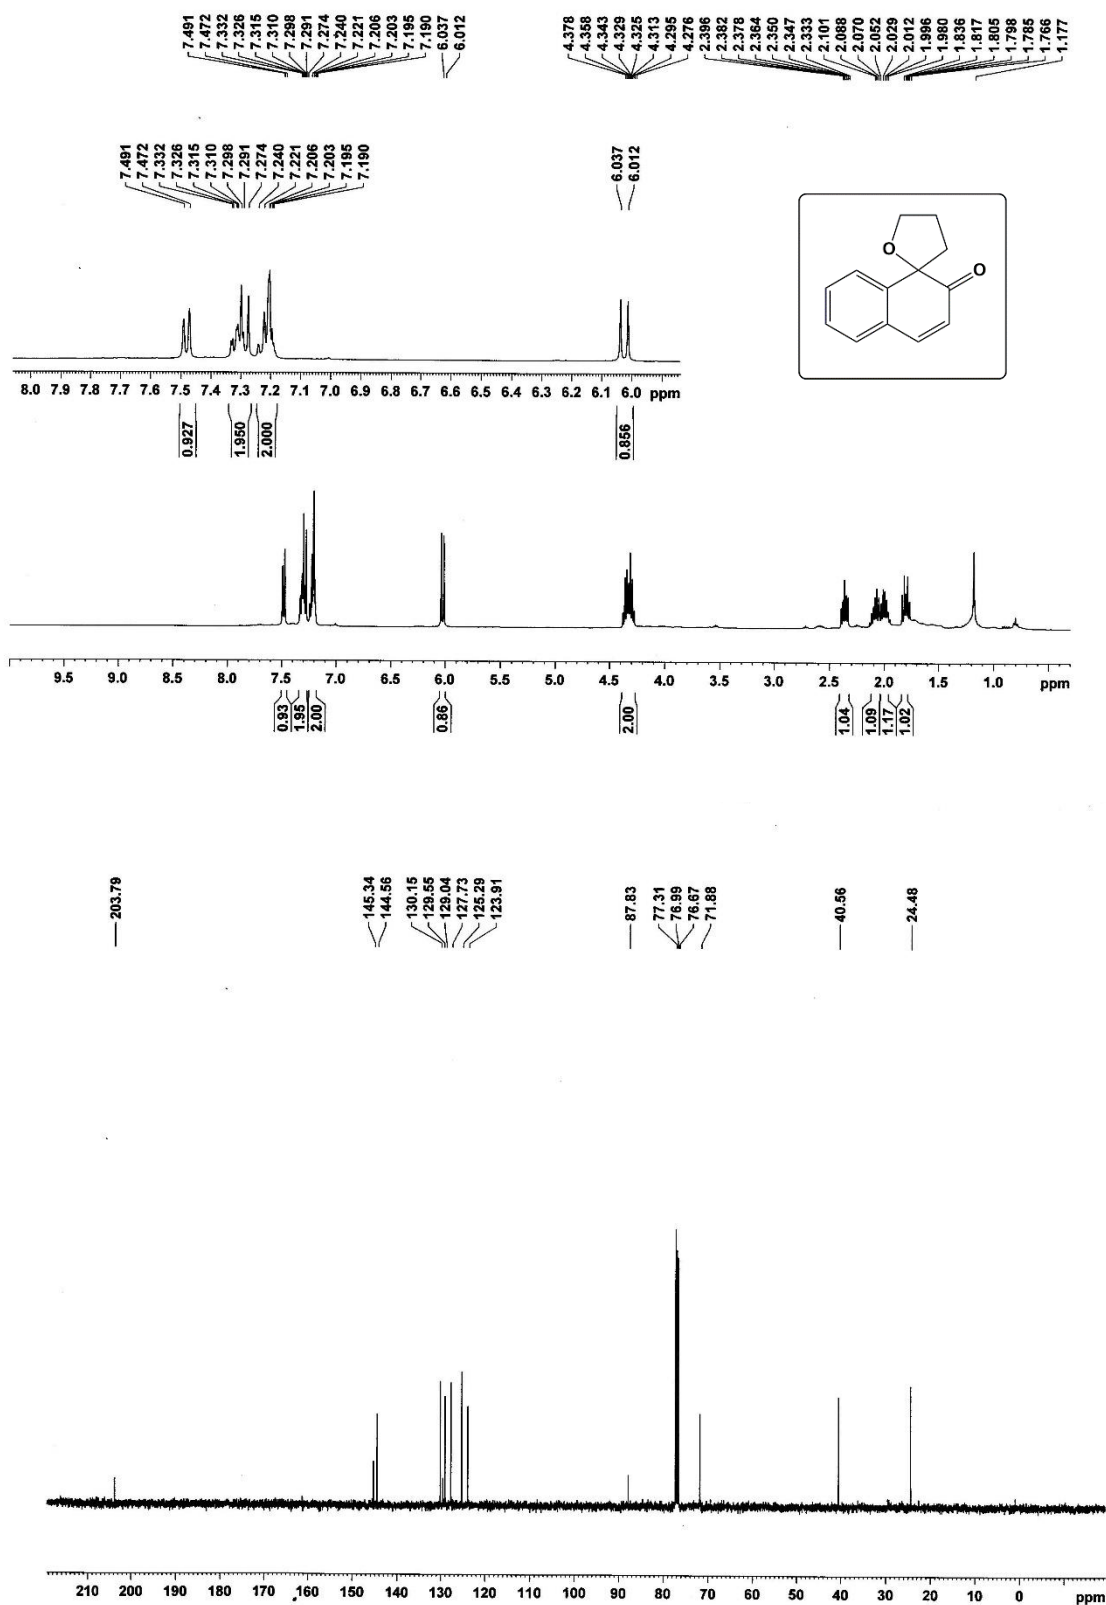

5,5-dimethyl-4,5-dihydro-2'H, 3H-spiro[furan-2,1'-naphthalen]-2'-one (4b)

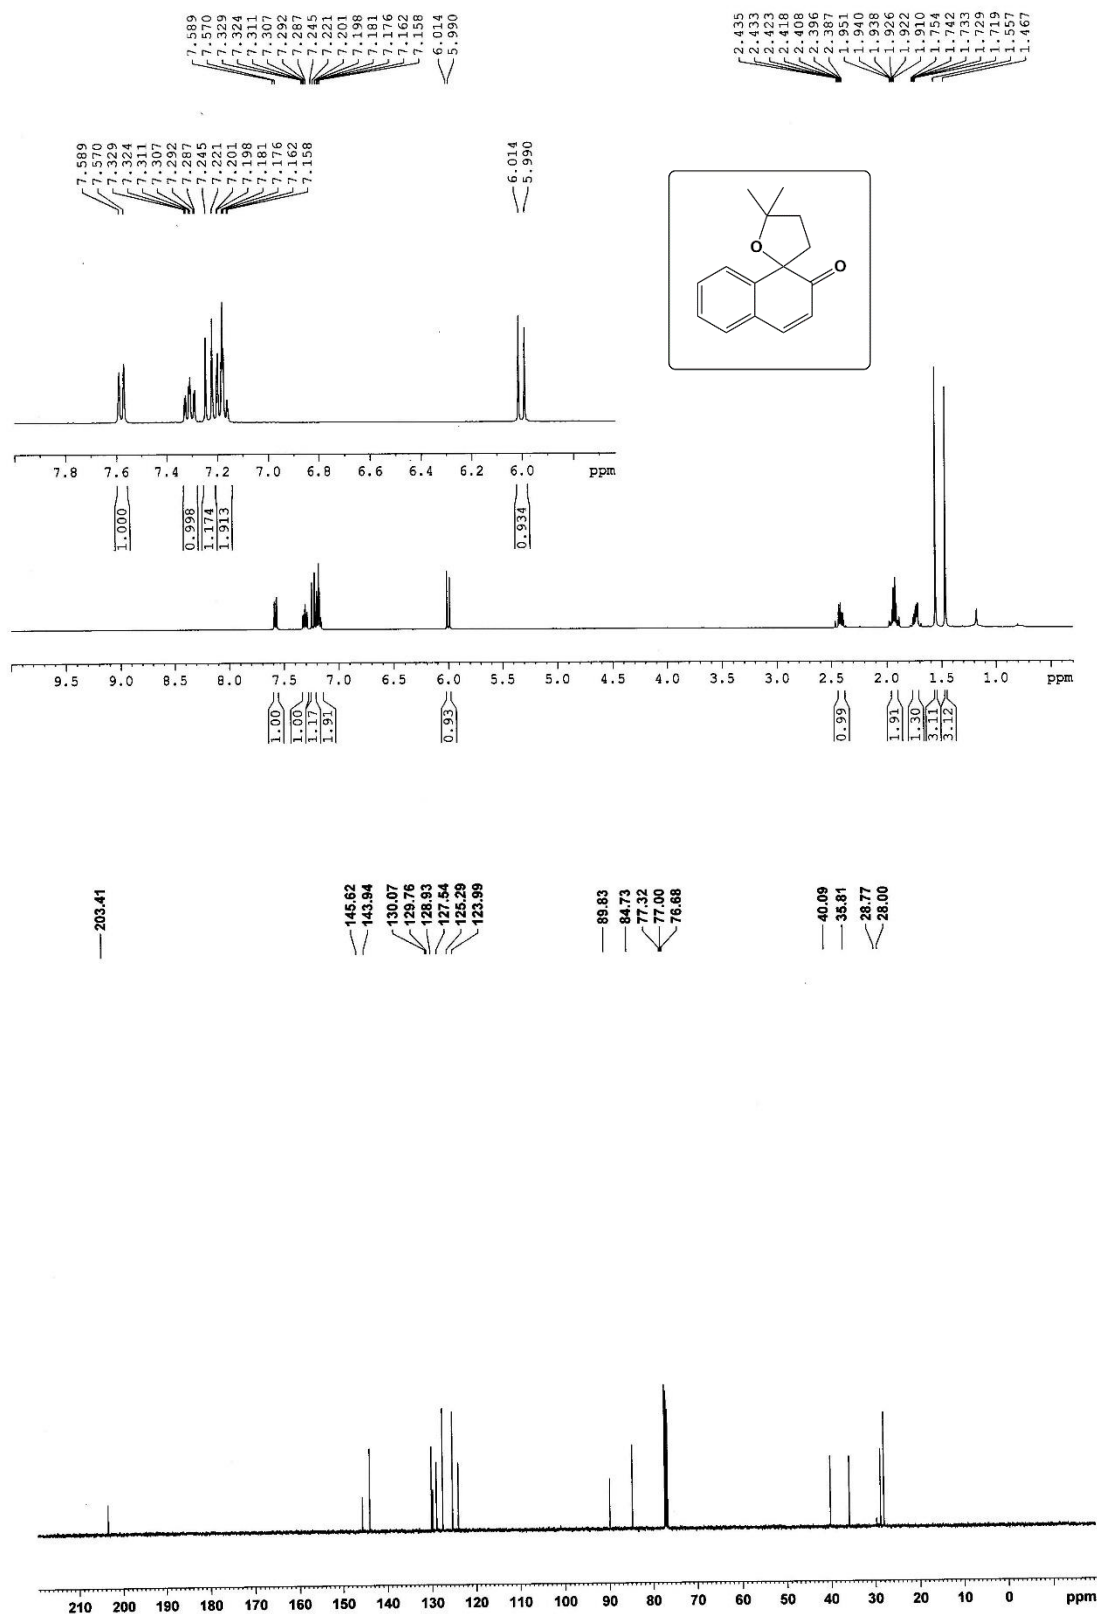

5,5-diethyl-4,5-dihydro-2'H, 3H-spiro[furan-2,1'-naphthalen]-2'-one (4c)

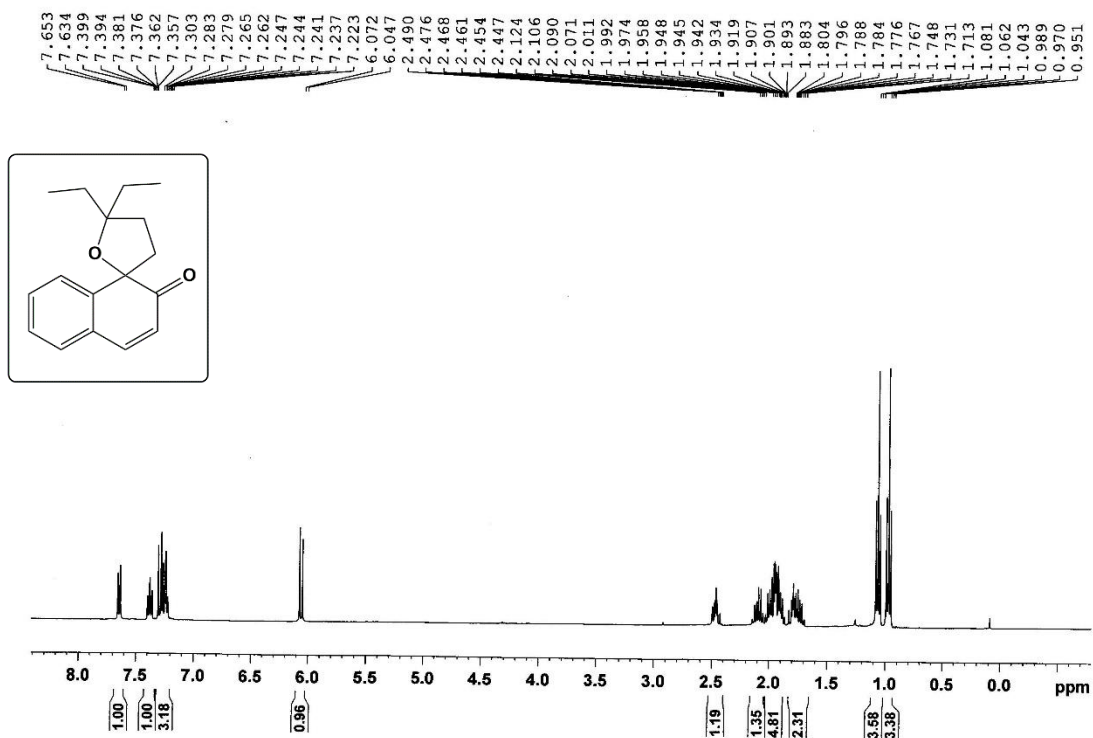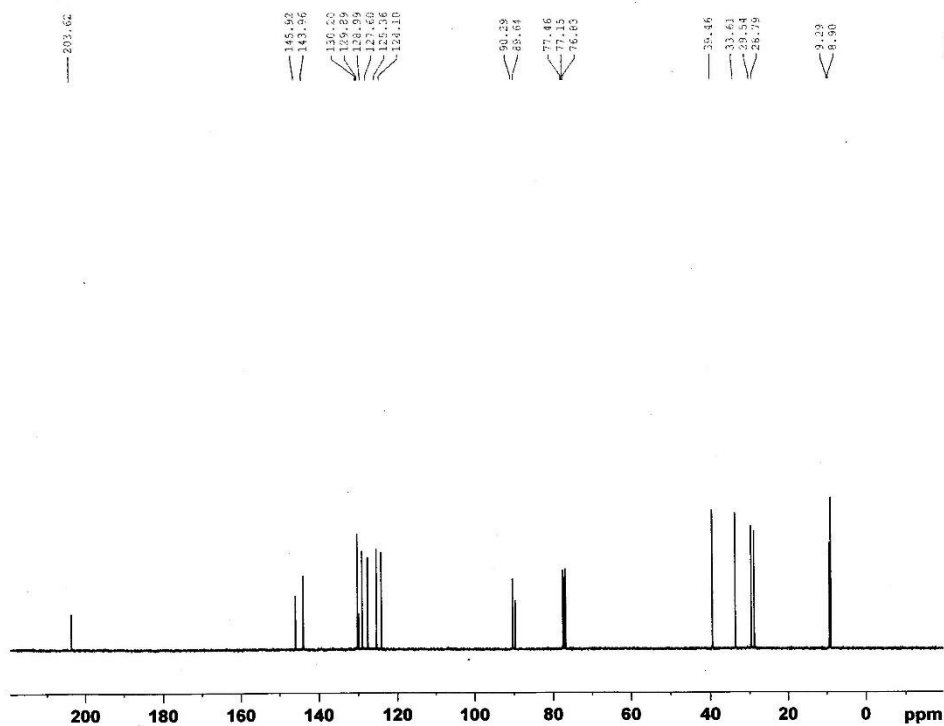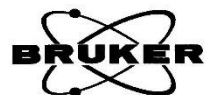

NAME 27.7.2015  
EXPNO 3  
PROCNO 1  
Date 20150726  
Time 21.44  
INSTRUM spect  
PROBHD 5 mm VAMB001  
PULPROG zgpg30  
TD 32768  
SOLVENT CDCl3  
NS 102  
DS 4  
SWH 24038.461 Hz  
FIDRES 0.733586 Hz  
AQ 0.6816244 sec  
RG 203  
DM 20.800 usec  
DE 6.50 usec  
TE 299.6 K  
D1 2.00000000 sec  
D11 0.03000000 sec  
TD 1

----- CHANNEL f1 -----  
NUC1 13C  
PL 9.00 usec  
PL1 -1.00 dB  
PL1W 42.37451935 W  
SFO1 100.6278553 MHz

----- CHANNEL f2 -----  
CPDPRG2 waltz16  
NUC2 1H  
PCPD2 80.00 usec  
PL2 -1.00 dB  
PL12 14.00 dB  
PL13 14.00 dB  
PL2W 9.48683262 W  
PL12W 0.30000001 W  
PL13W 0.30000001 W  
SFO2 400.1516006 MHz  
SI 16384  
SF 100.6177980 MHz  
WDW EM  
SSB 0  
LA 1.00 Hz  
GB 0  
PC 1.40



5,5-dibenzyl-4,5-dihydro-2'H, 3H-spiro[furan-2,1'-naphthalen]-2'-one (4d)

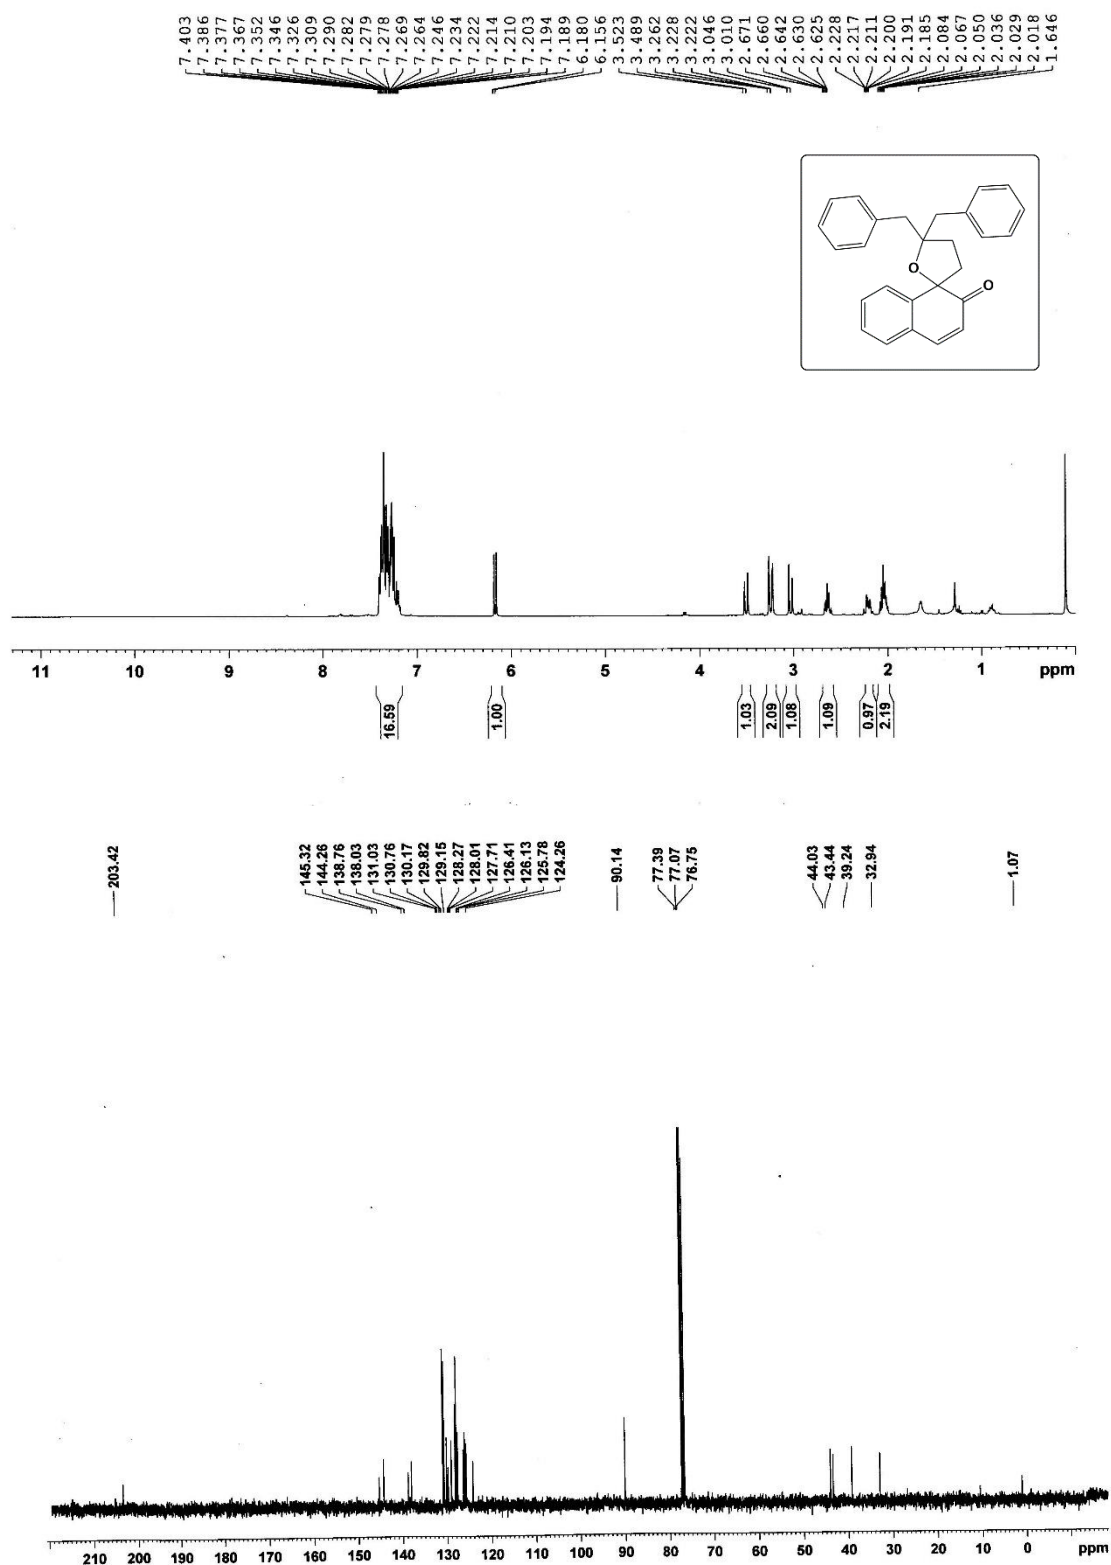

# 5,5-diphenyl-4,5-dihydro-2'H,3H-spiro[furan-2,1'-naphthalen]-2'-one (4e)

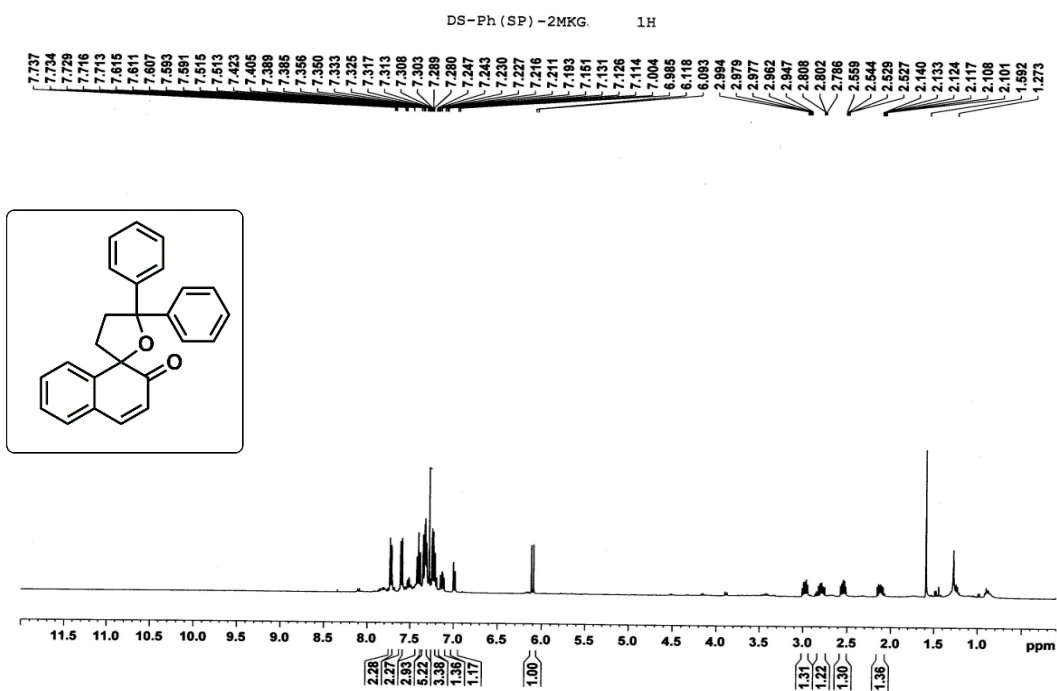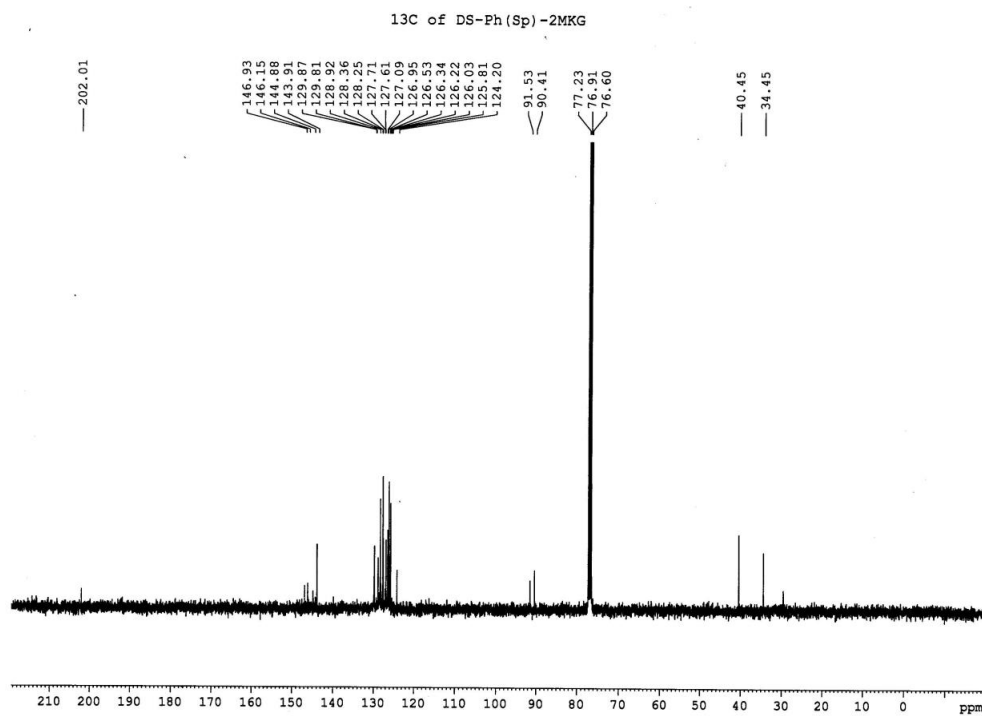

4'-bromo-4,5-dihydro-1'H, 3H-spiro[furan-2, 2'-naphthalen]-1'-one (4f)

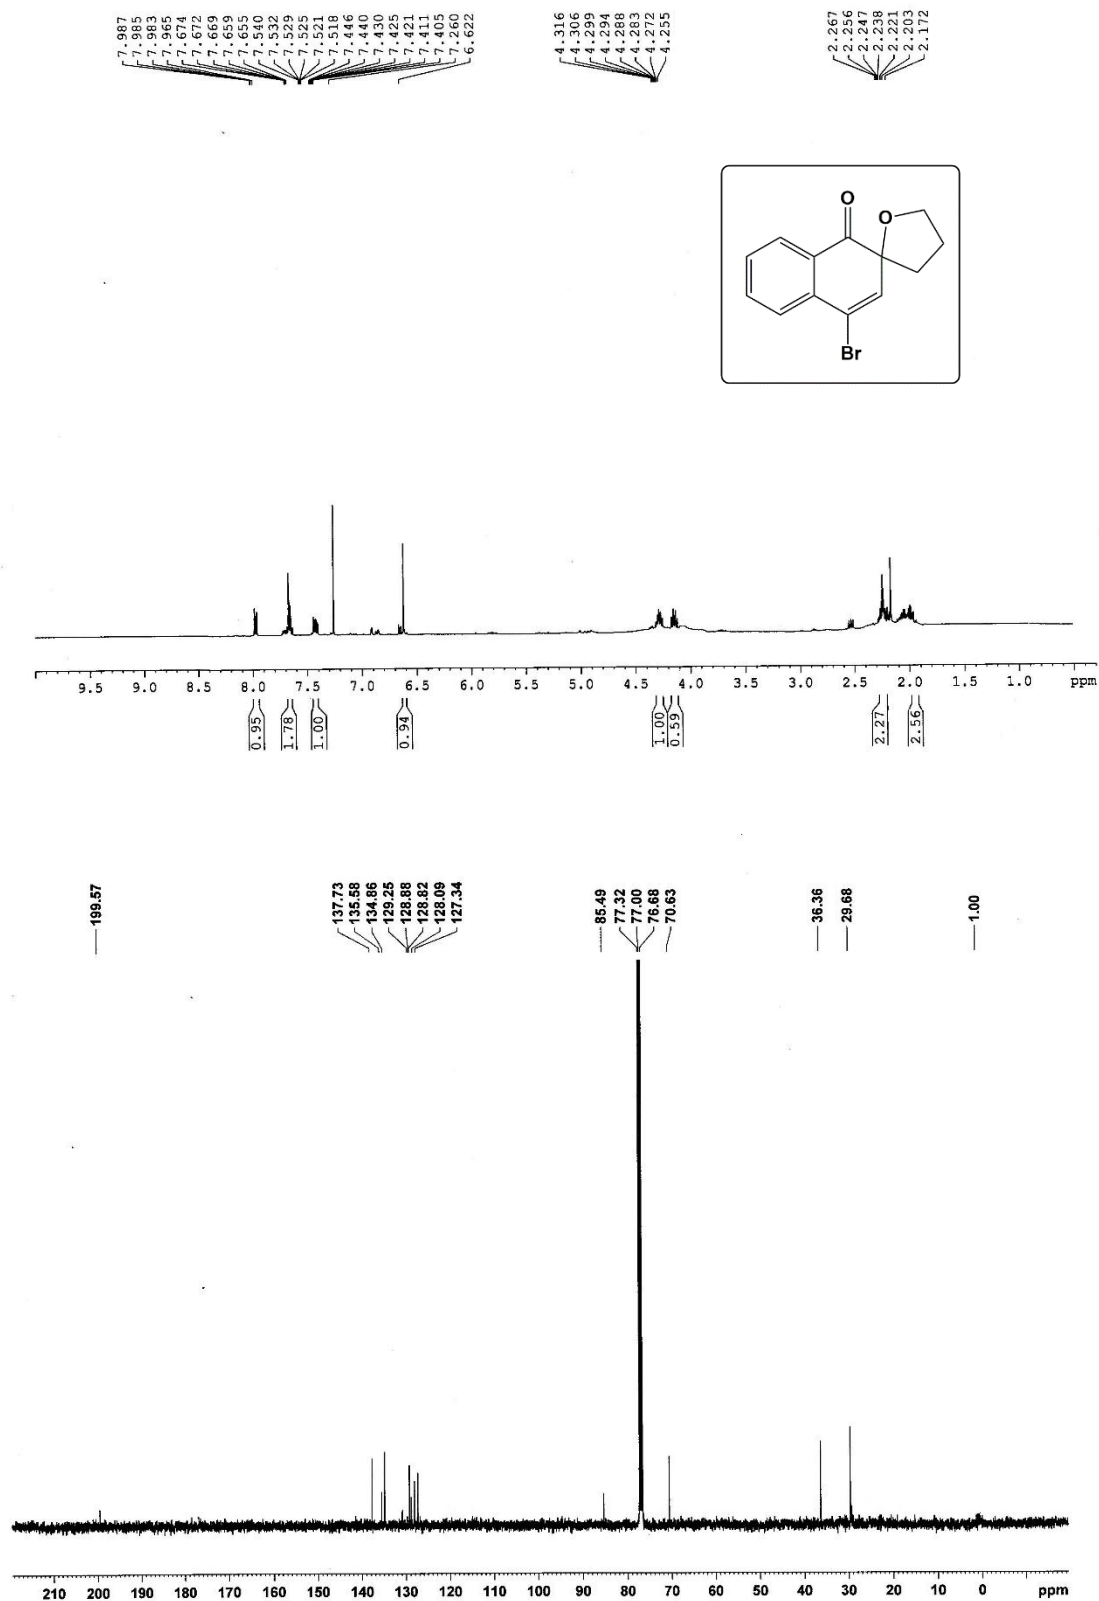

4'-bromo-5,5-dimethyl-4,5-dihydro-1'H, 3H-spiro[furan-2, 2'-naphthalen]-1'-one (4g)

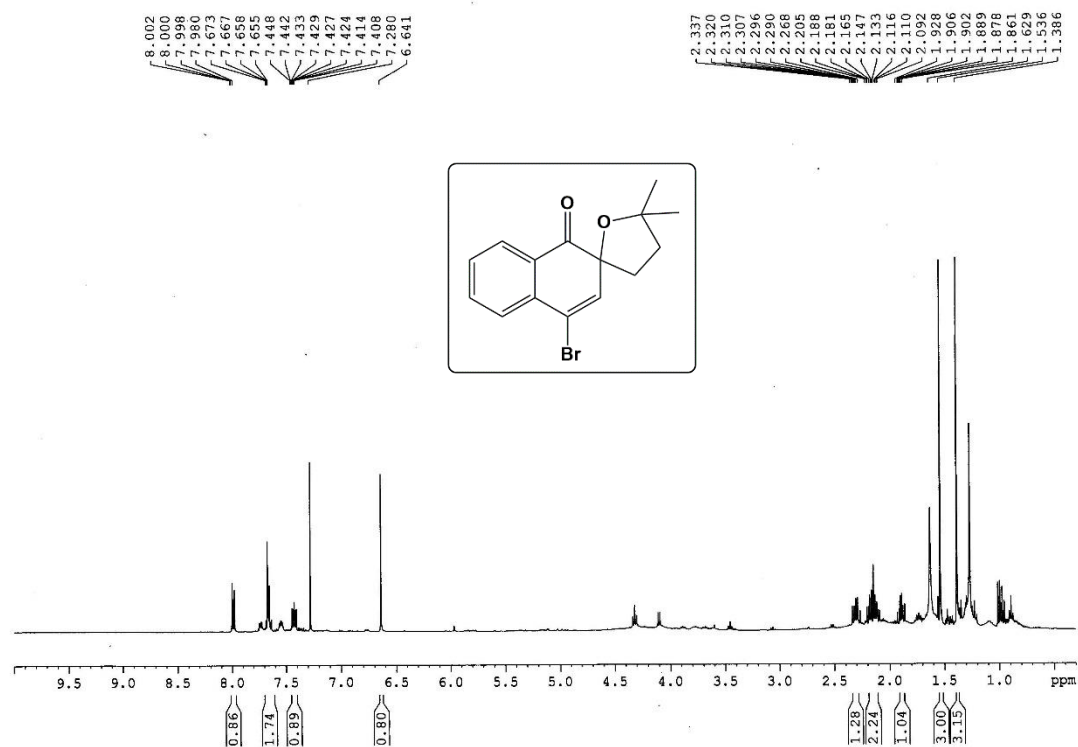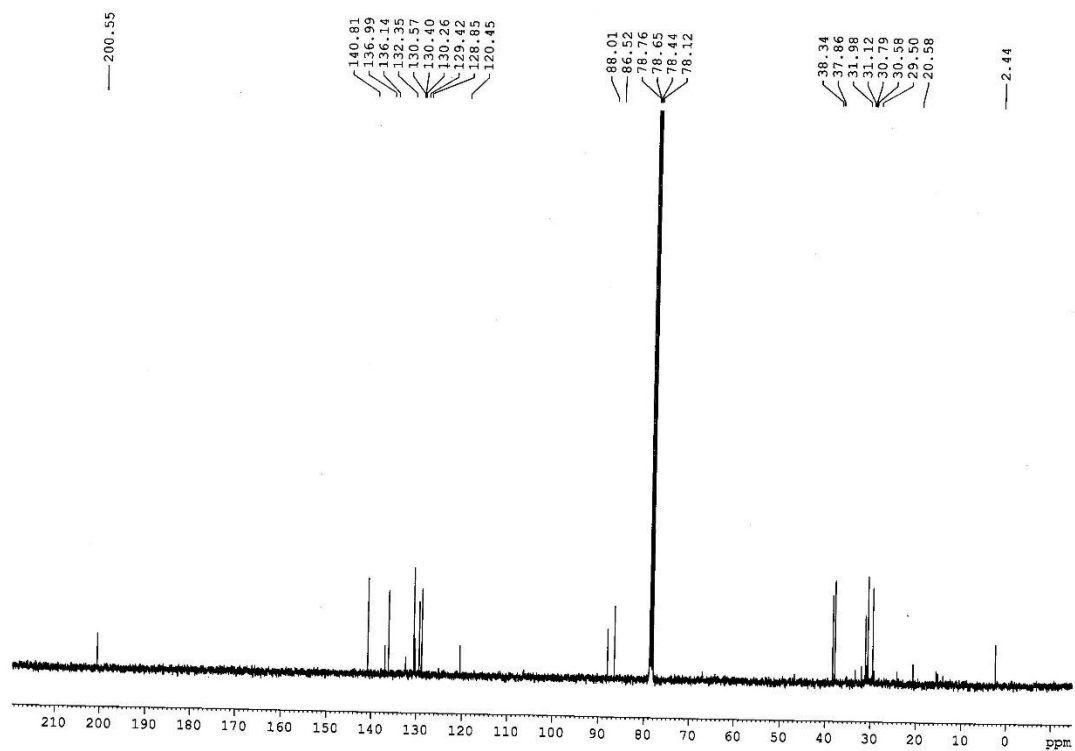

(1'S, 5S)/(1'R, 5R)-5-methyl-4,5-dihydro-2'H,3H-spiro[furan-2,1'-naphthalen]-2'-one (6a)

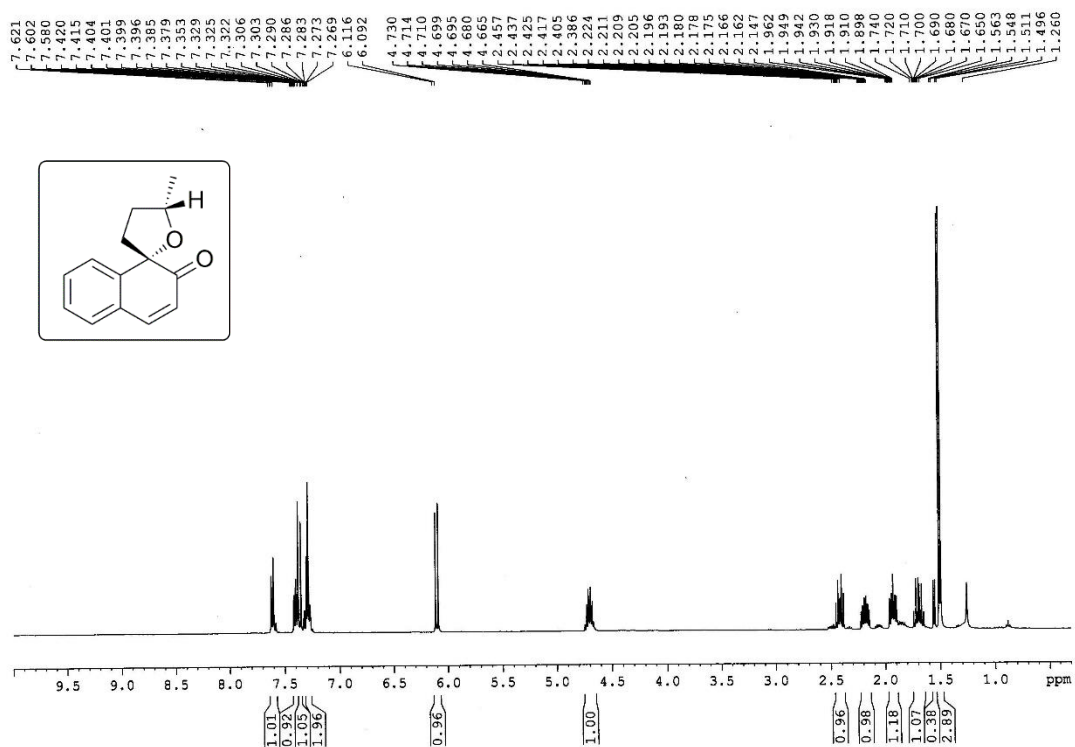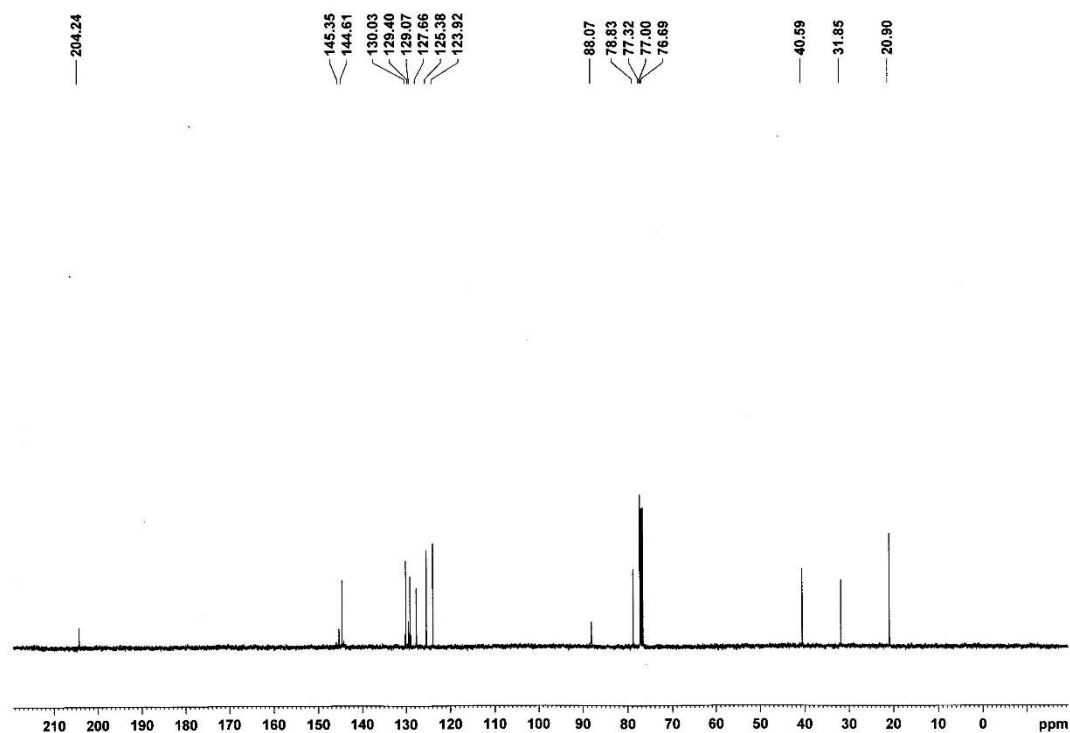

(1'S, 5R)/(1'R,5S)--5-methyl-4,5-dihydro-2'H,3H-spiro[furan-2,1'-naphthalen]-2'-one (7a)

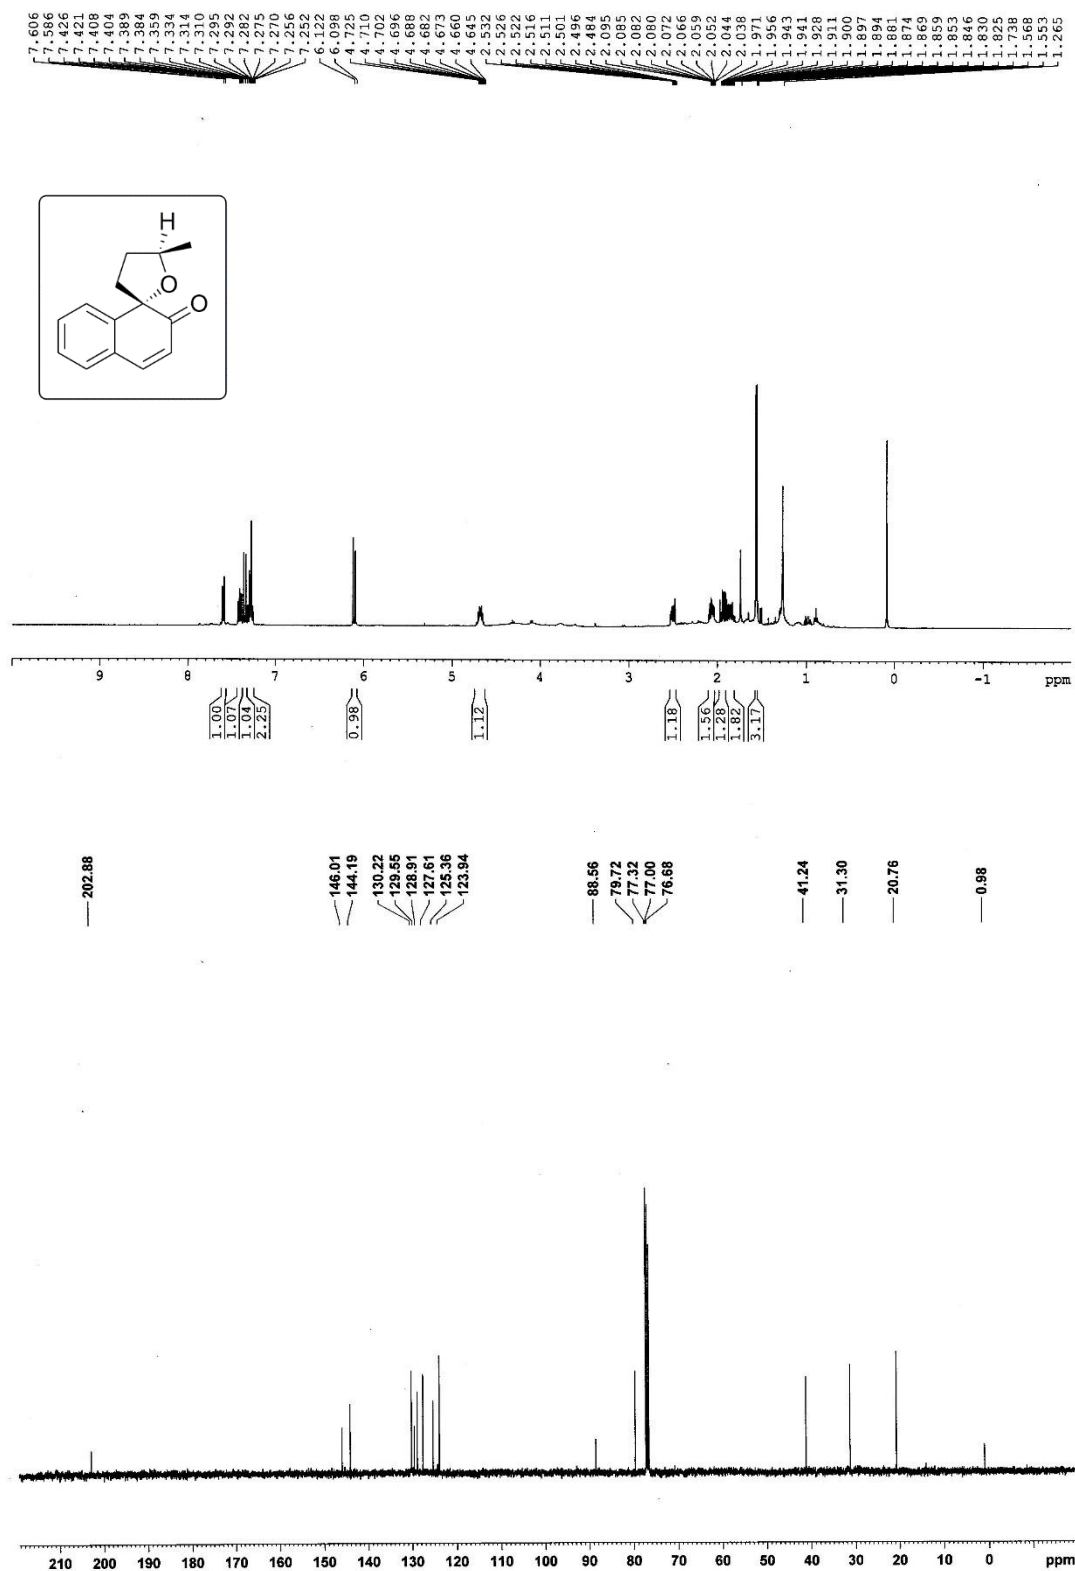

5-ethyl-4,5-dihydro-2'H,3H-spiro[furan-2,1'-naphthalen]-2'-one (6b & 7b)

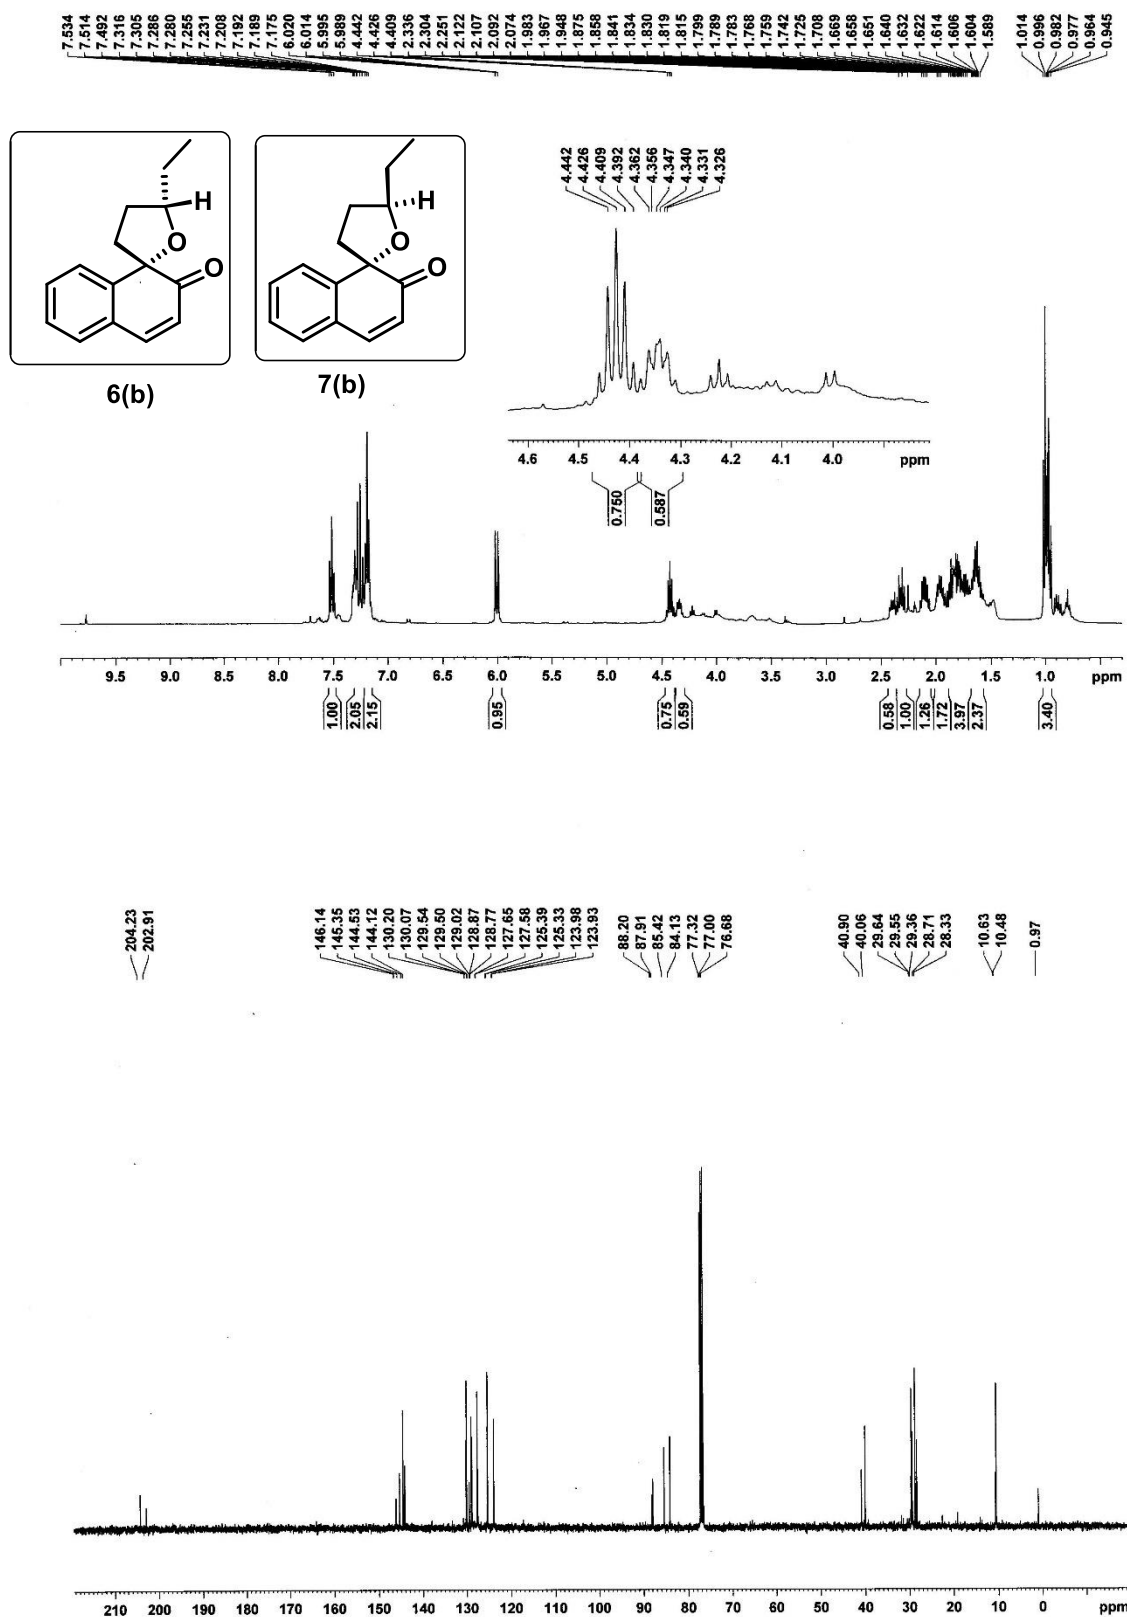

Mixture NMR of 5-benzyl-4,5-dihydro-2'H,3H-spiro[furan-2,1'-naphthalen]-2'-one

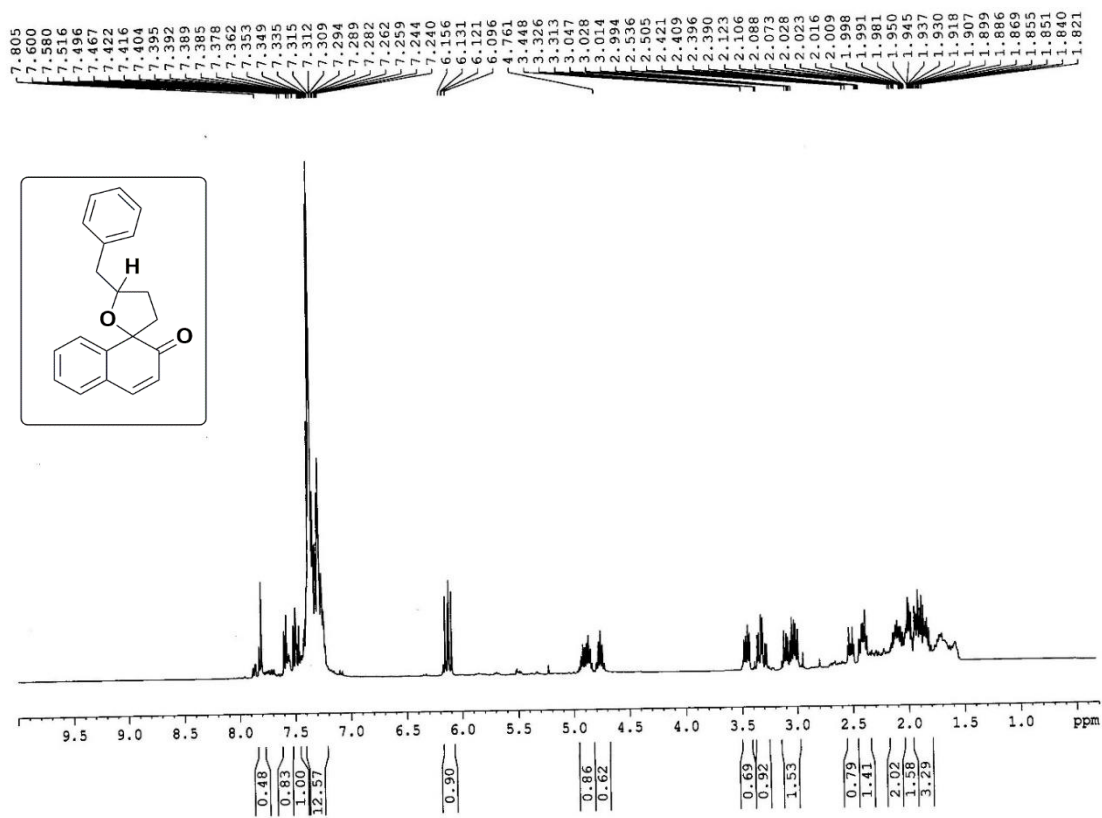



**(1'S, 5R)/(1'R, 5S)-5-benzyl-4,5-dihydro-2'H,3H-spiro[furan-2,1'-naphthalen]-2'-one (6c)**

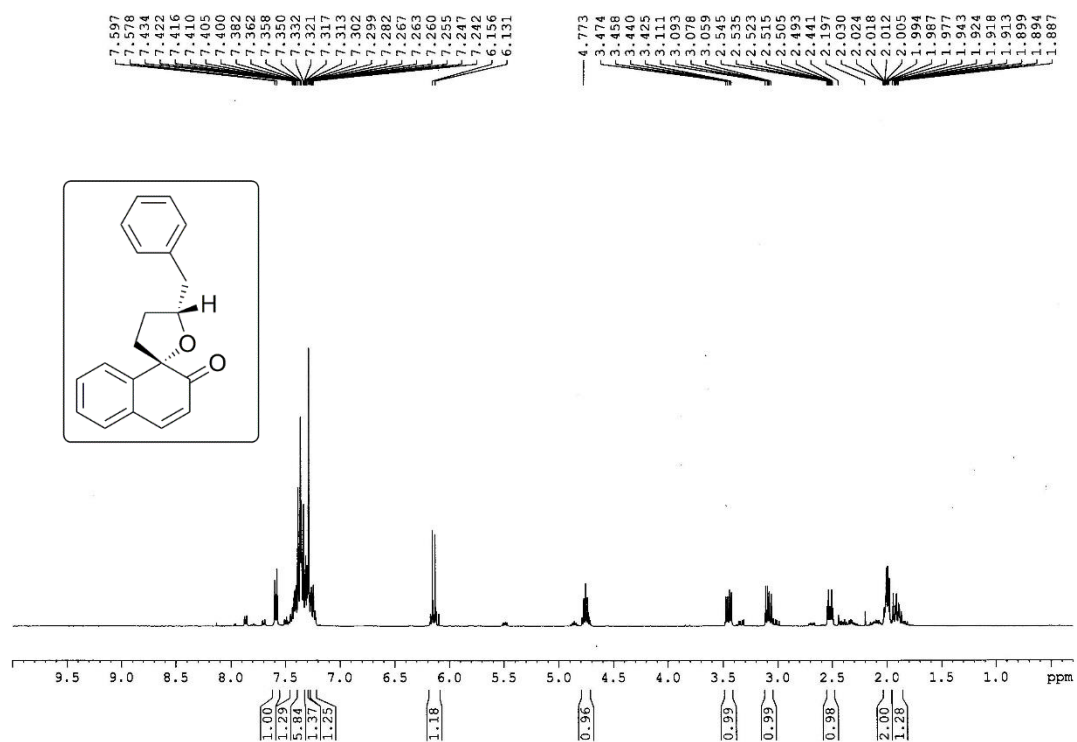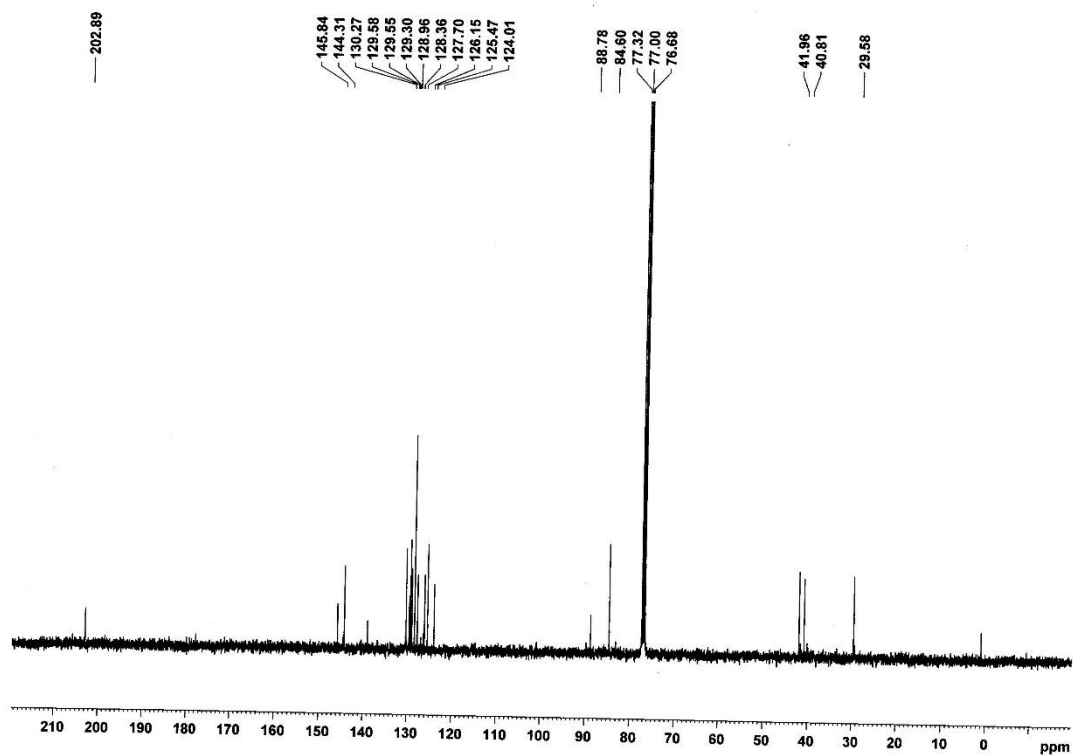

(1'S, 5S)/ (1'R, 5R)-5-benzyl-4,5-dihydro-2'H,3H-spiro[furan-2,1'-naphthalen]-2'-one (7c)

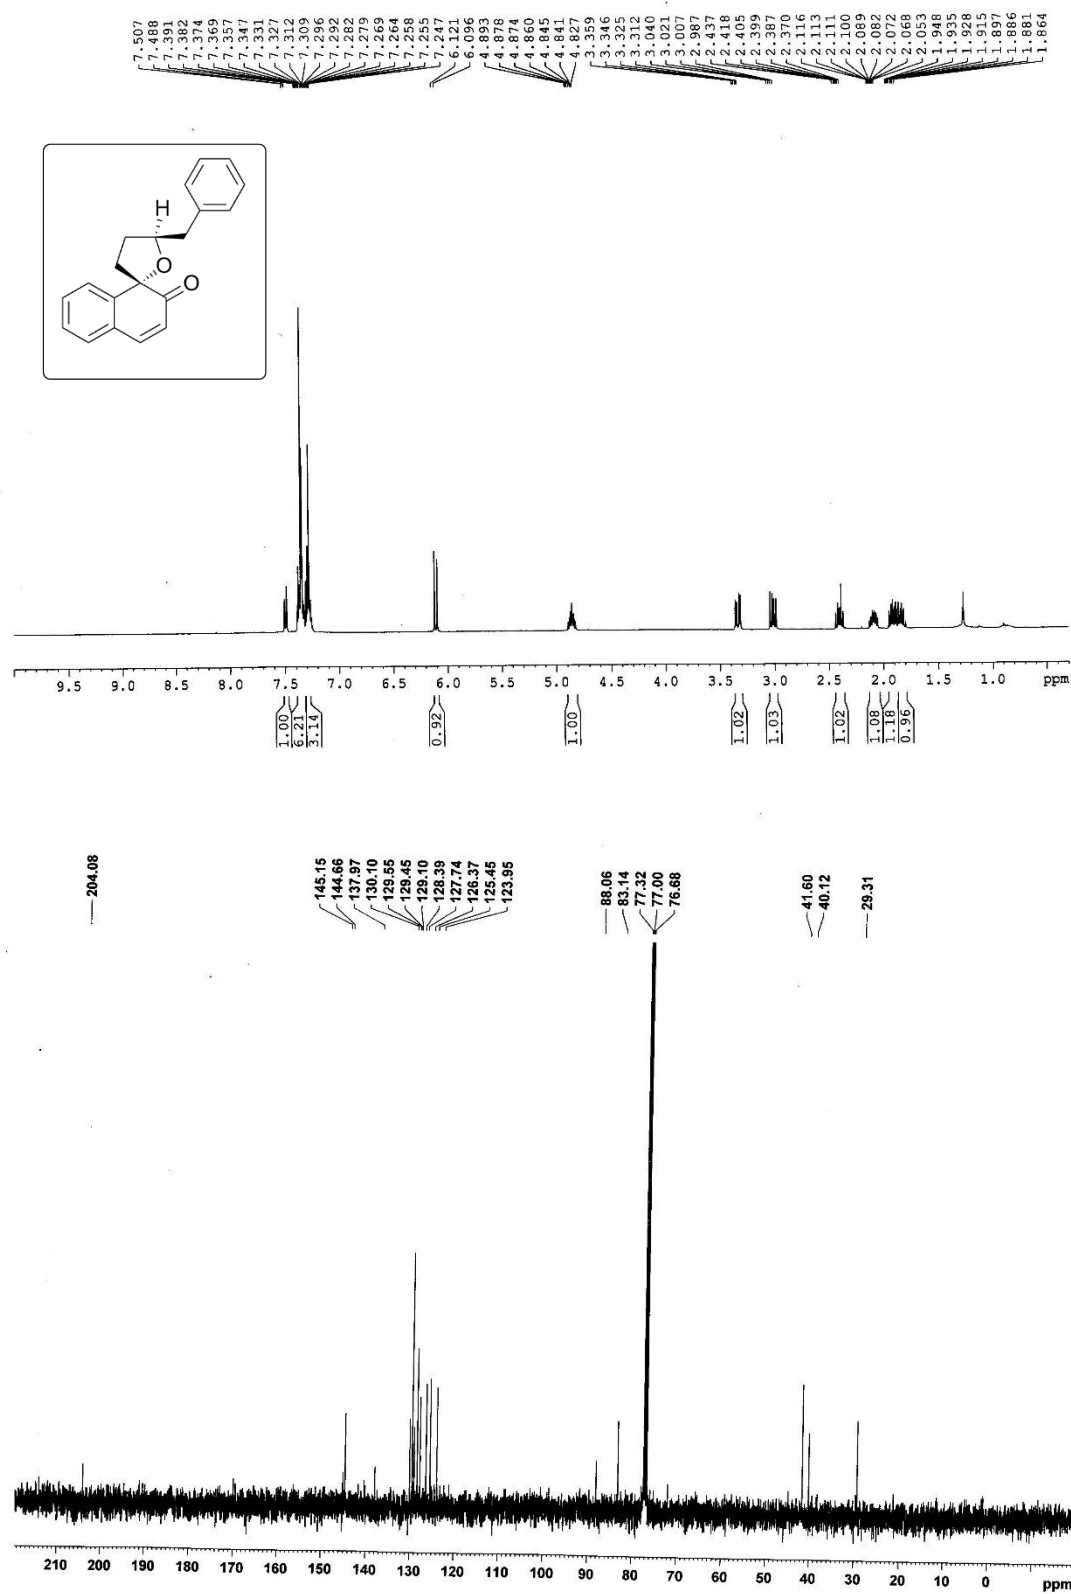

(1'S,5R)/ (1'R,5S)-5-phenyl-4,5-dihydro-2'H,3H-spiro[furan-2,1'-naphthalen]-2'-one (6d)

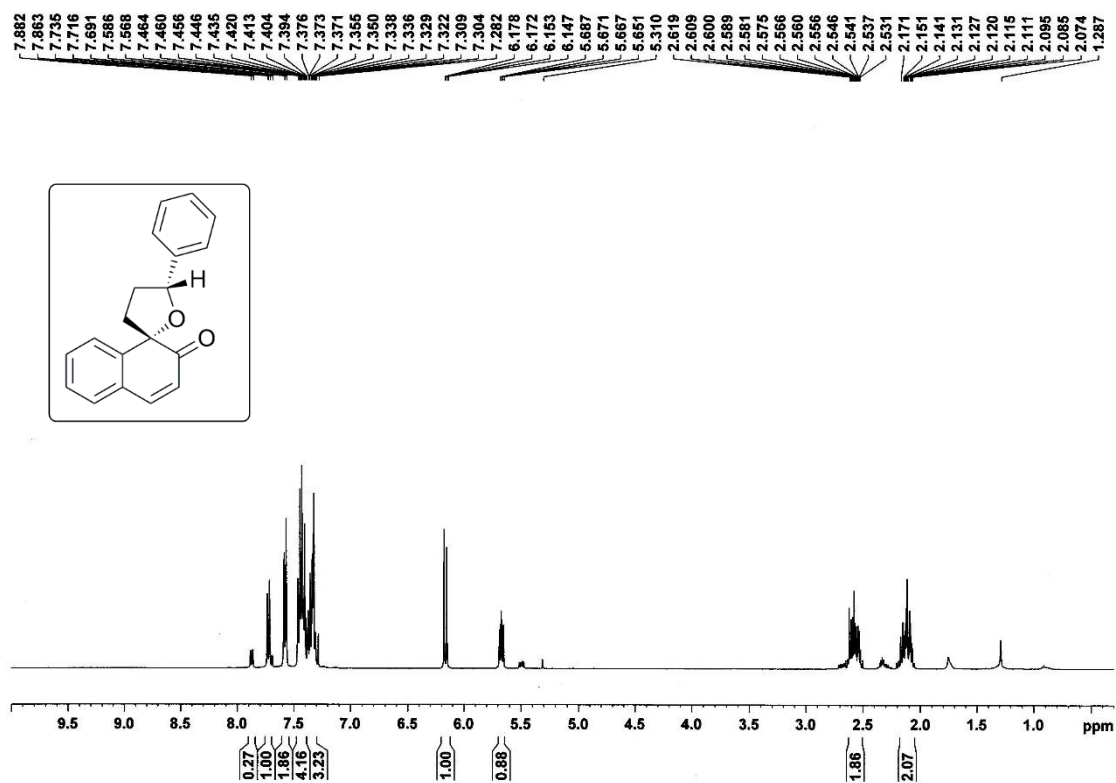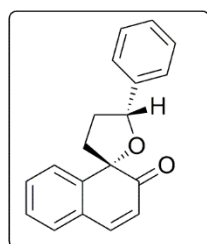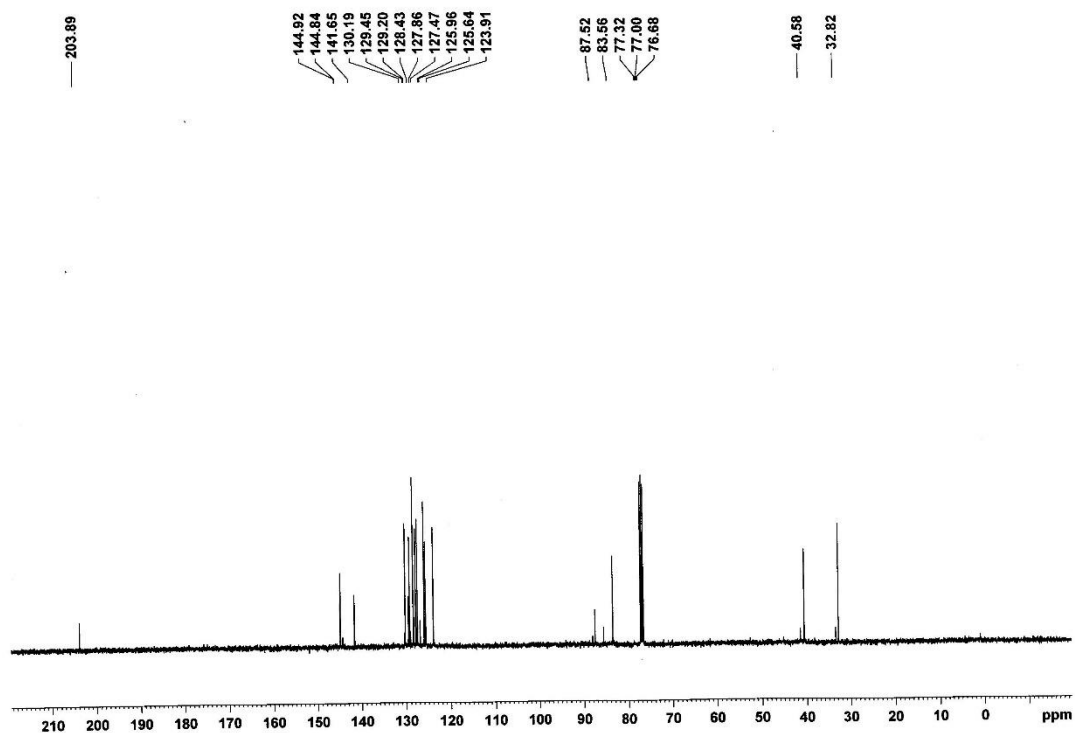

Mixture NMR of 5-phenyl-4,5-dihydro-2'H,3H-spiro[furan-2,1'-naphthalen]-2'-one (6d& 7d)

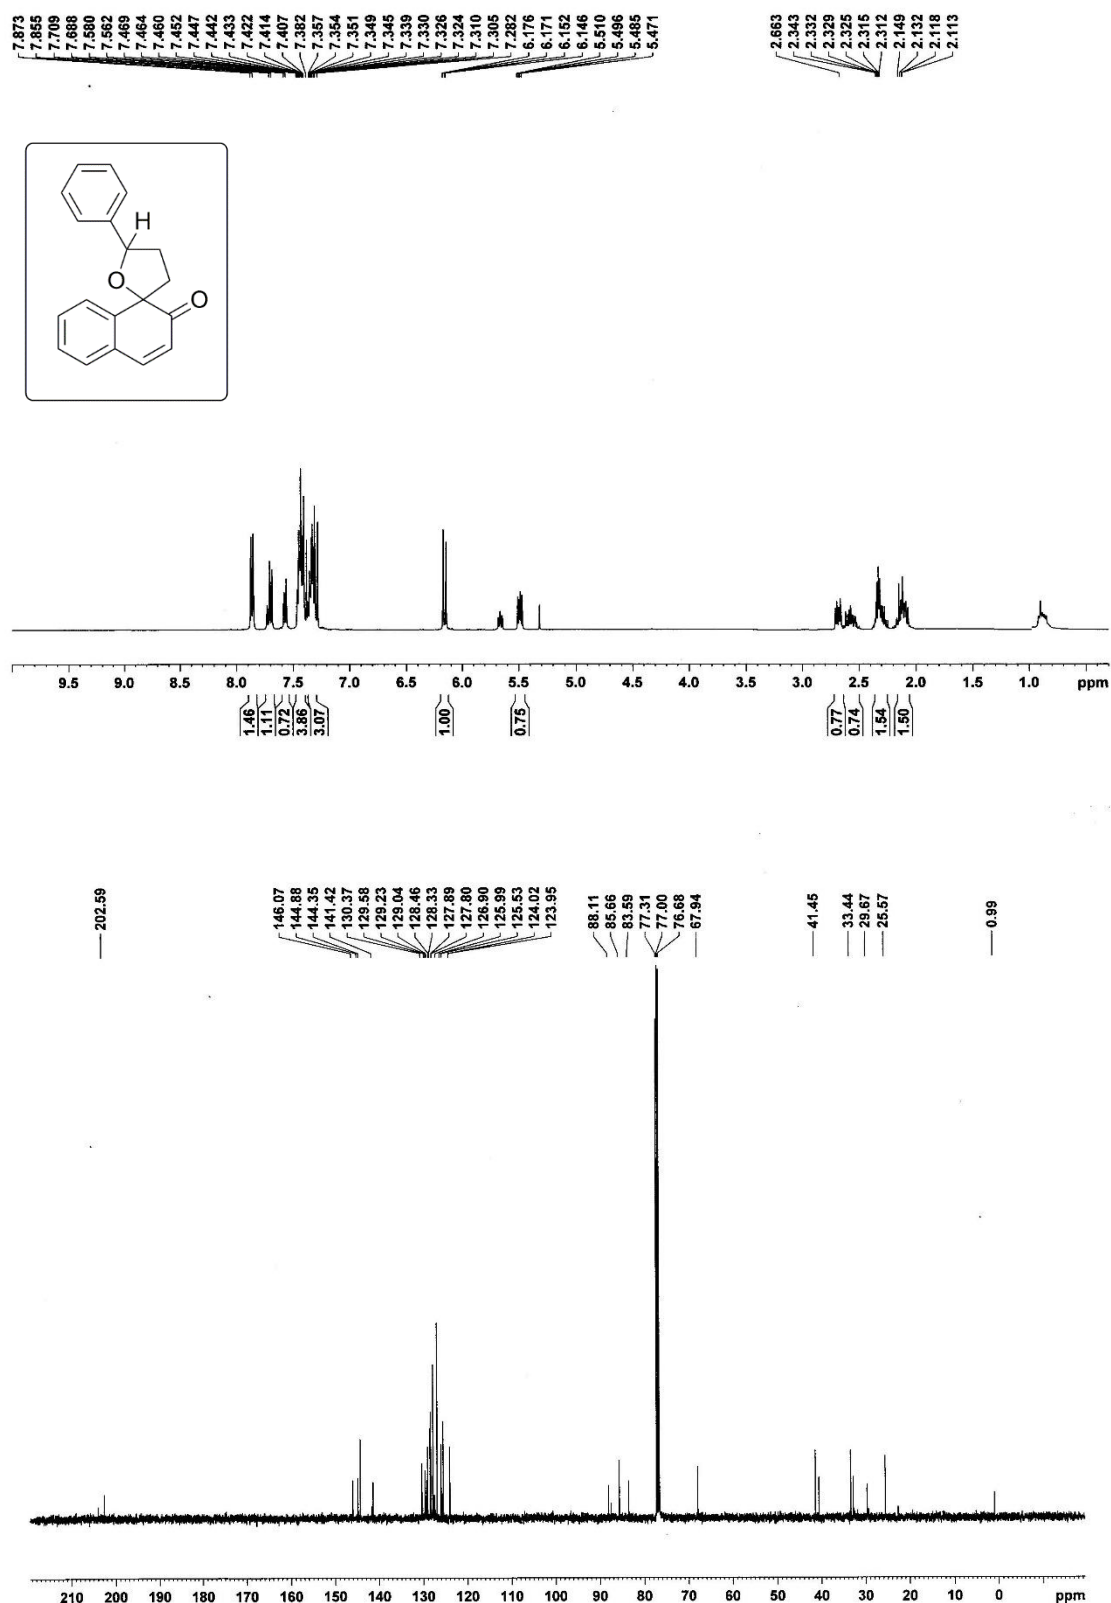

2, 2, 7-trimethyl-9-propyl-1-oxaspiro [4.5]deca-6,9-dien-8-one (9a)

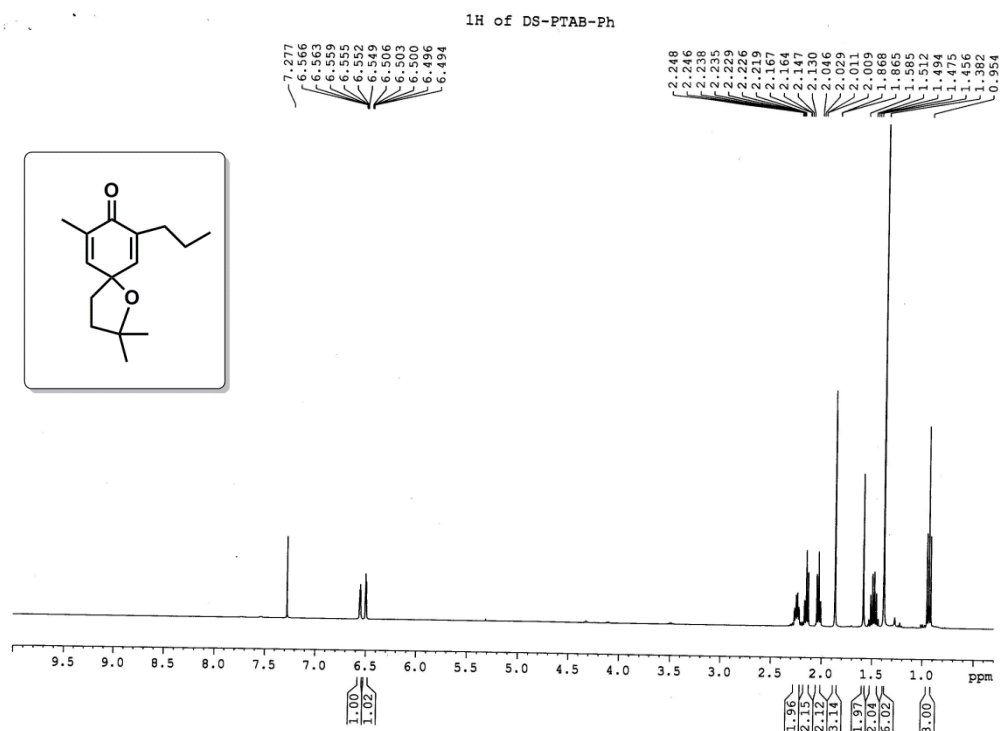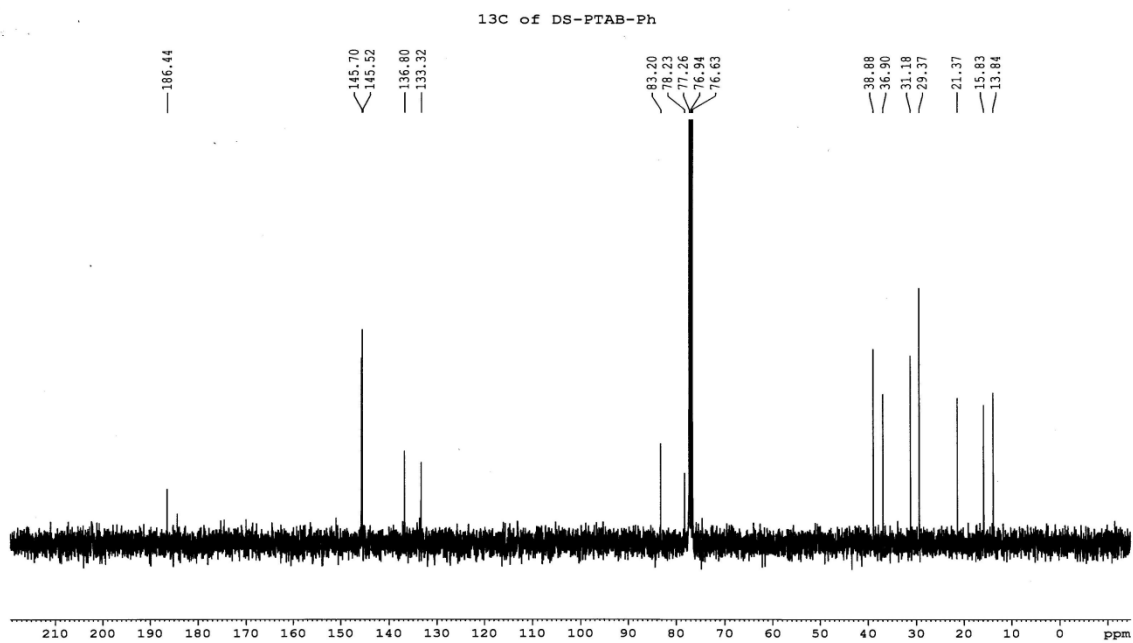

7-methyl-9-propyl-1-oxaspiro[4.5]deca-6,9-dien-8-one (9b)

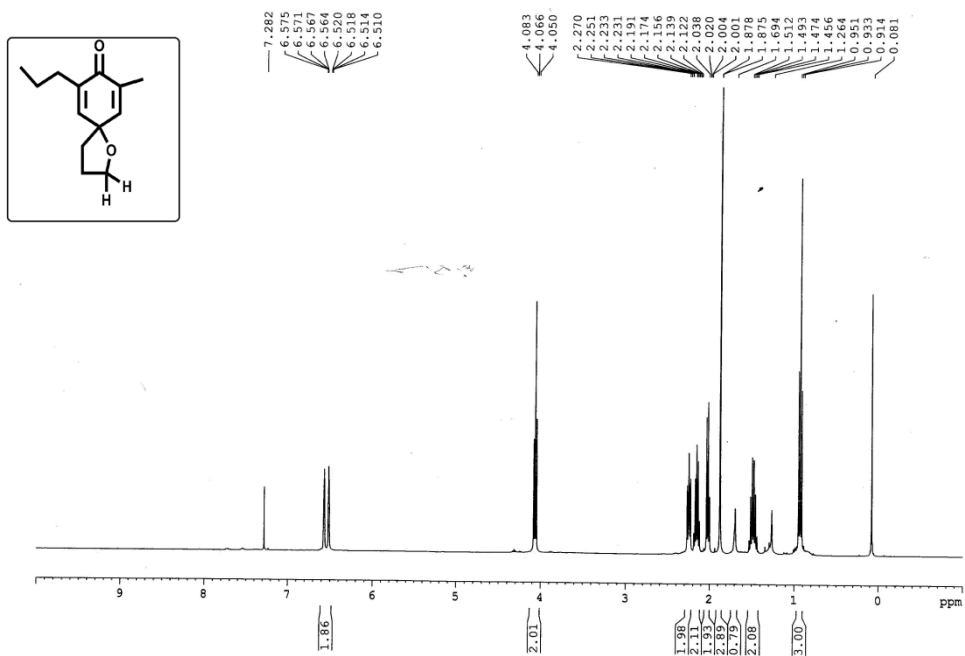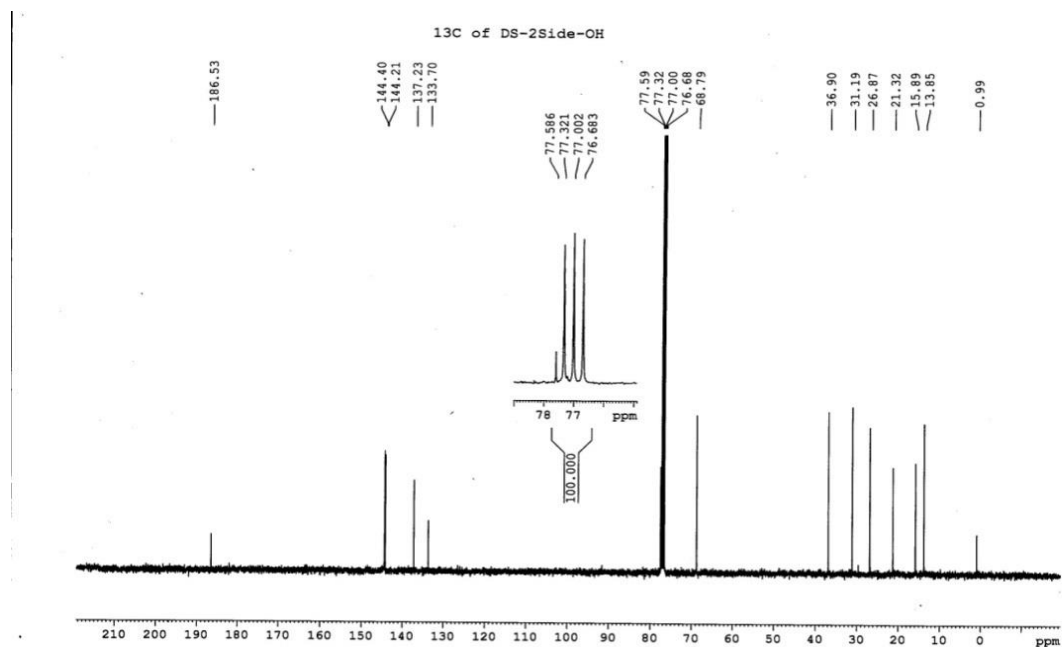

**2,2-dibenzyl-7-methyl-9-propyl-1-oxaspiro[4.5]deca-6,9-dien-8-one (9c)**

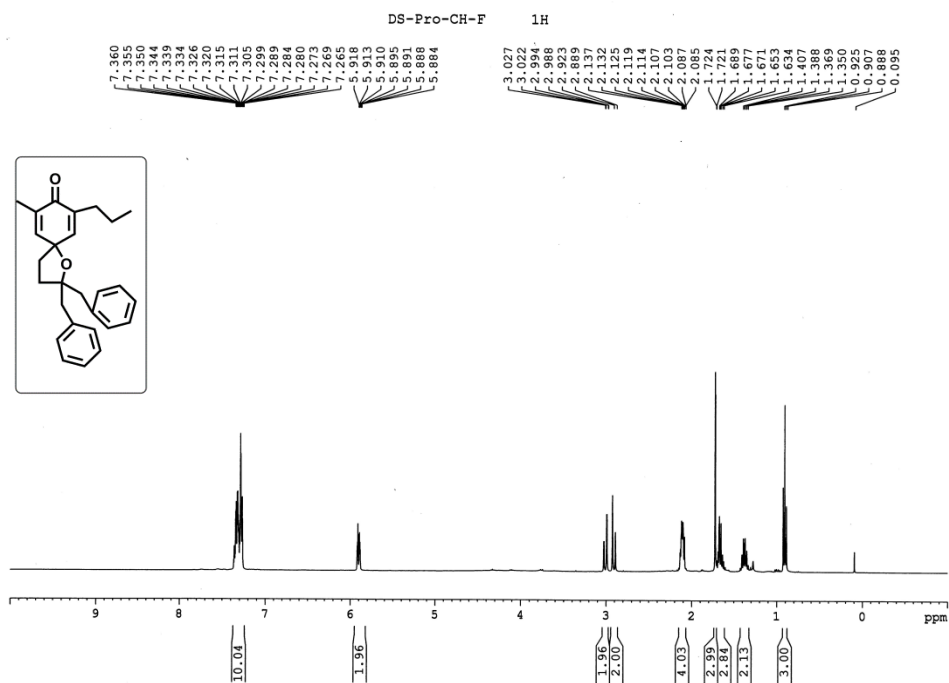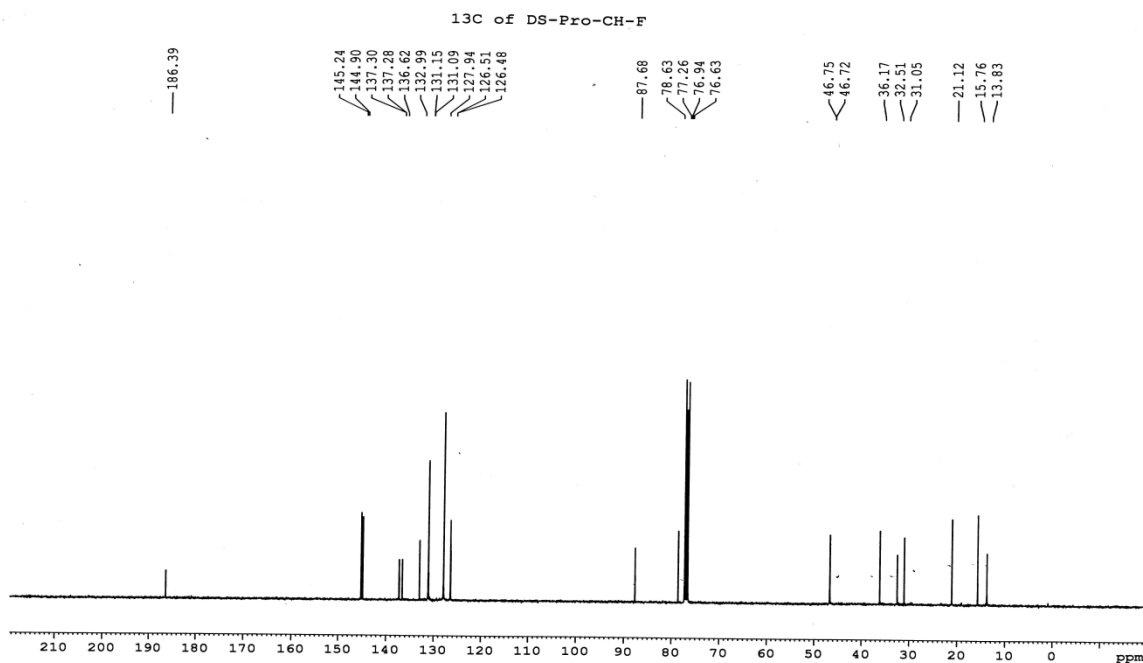

7,9-dimethyl-1-oxaspiro[4.5]deca-6,9-dien-8-one (9d)

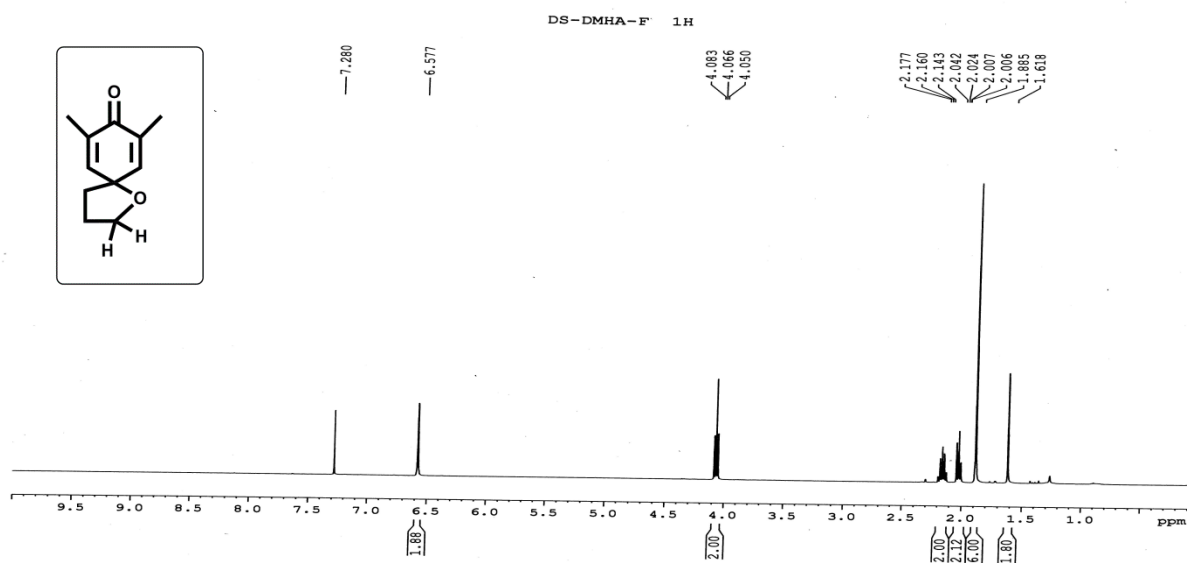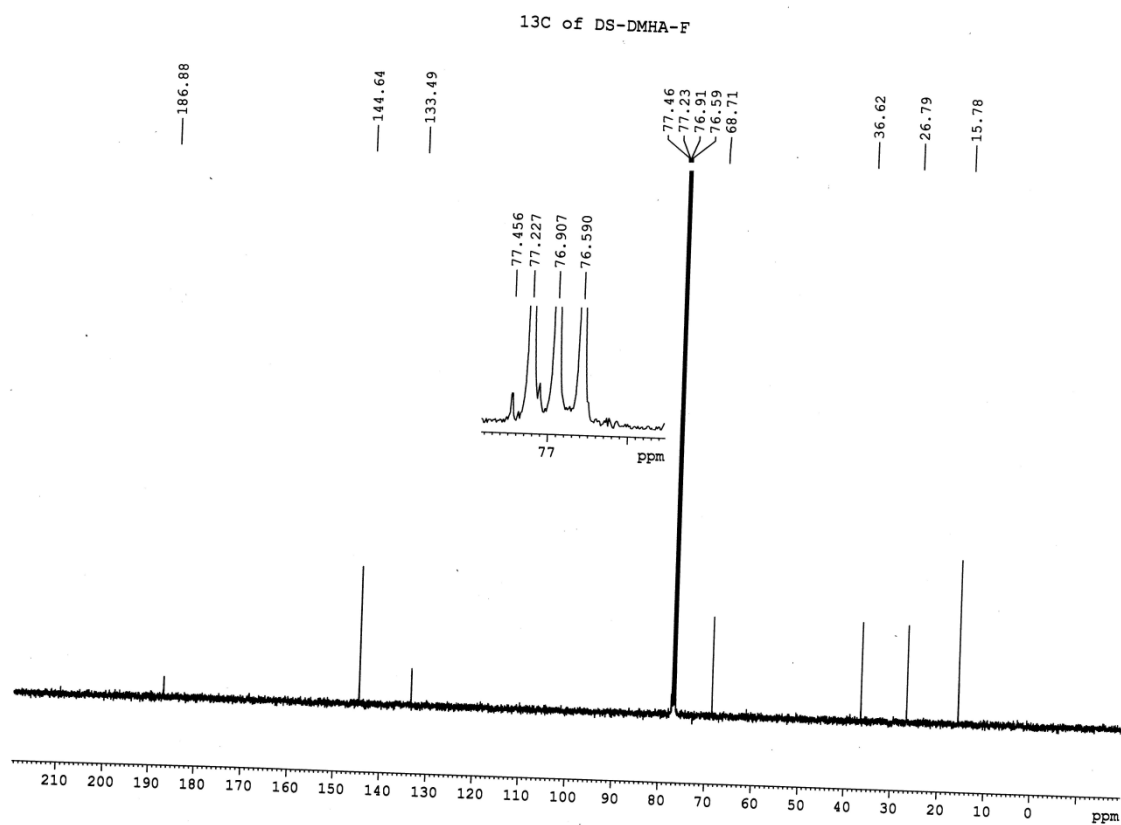



2,2-dibenzyl-7,9-dimethyl-1-oxaspiro[4.5]deca-6,9-dien-8-one (9e)

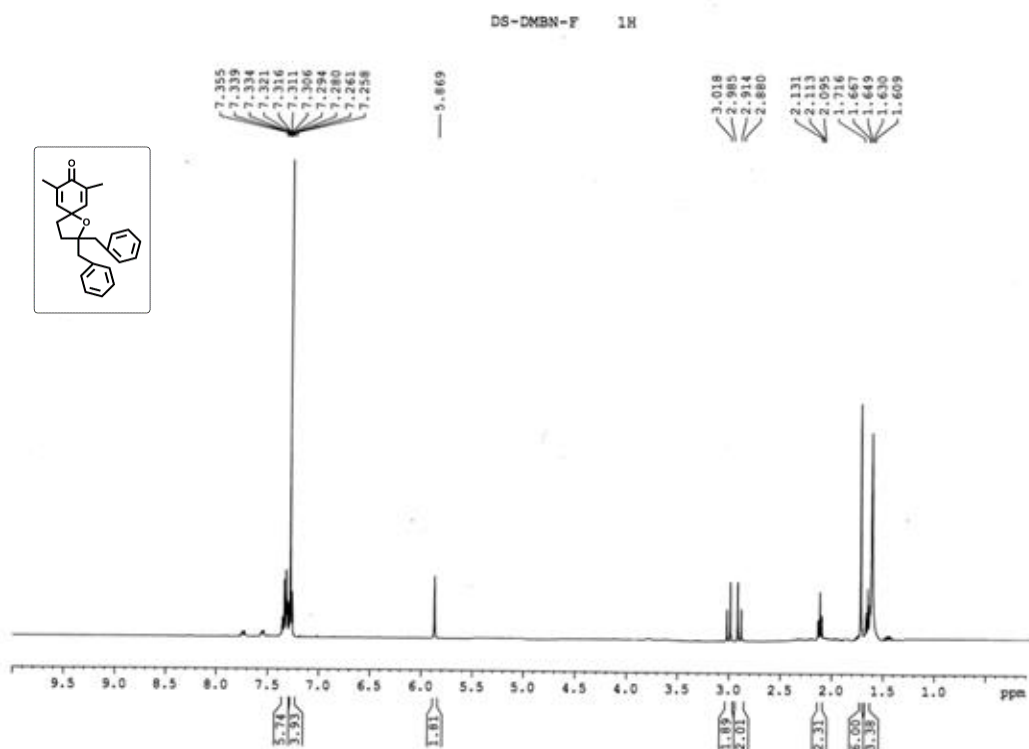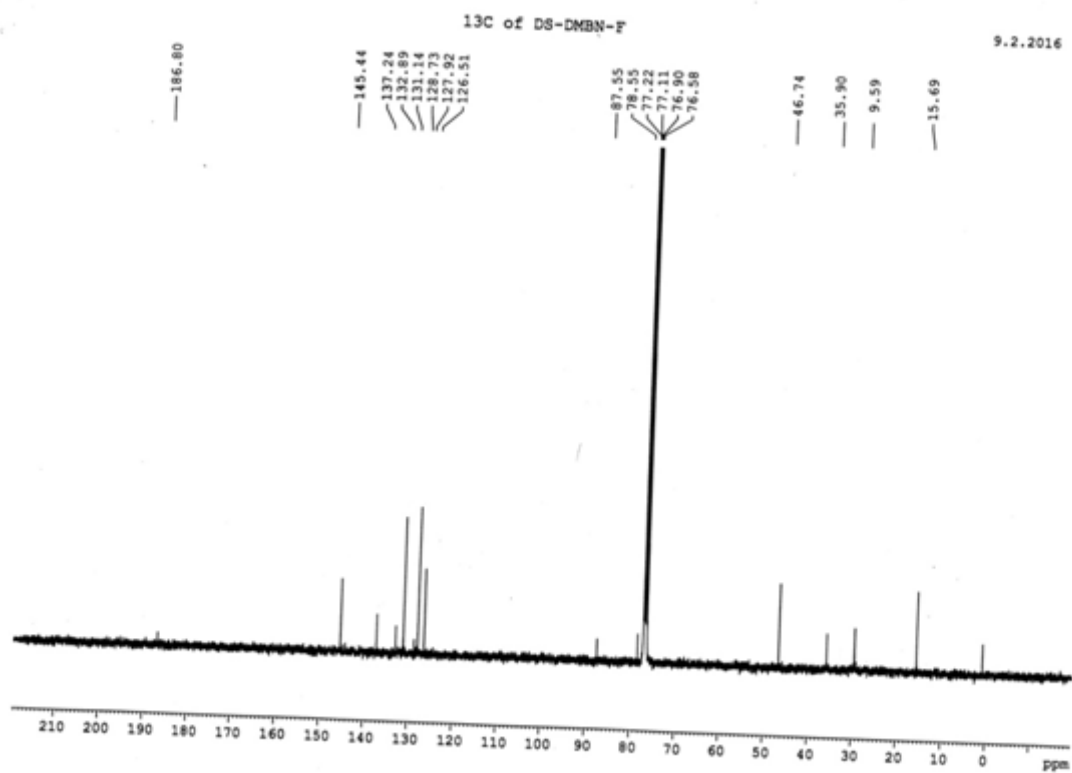

7,9-dimethyl-2,2-diphenyl-1-oxaspiro[4.5]deca-6,9-dien-8-one (9f)

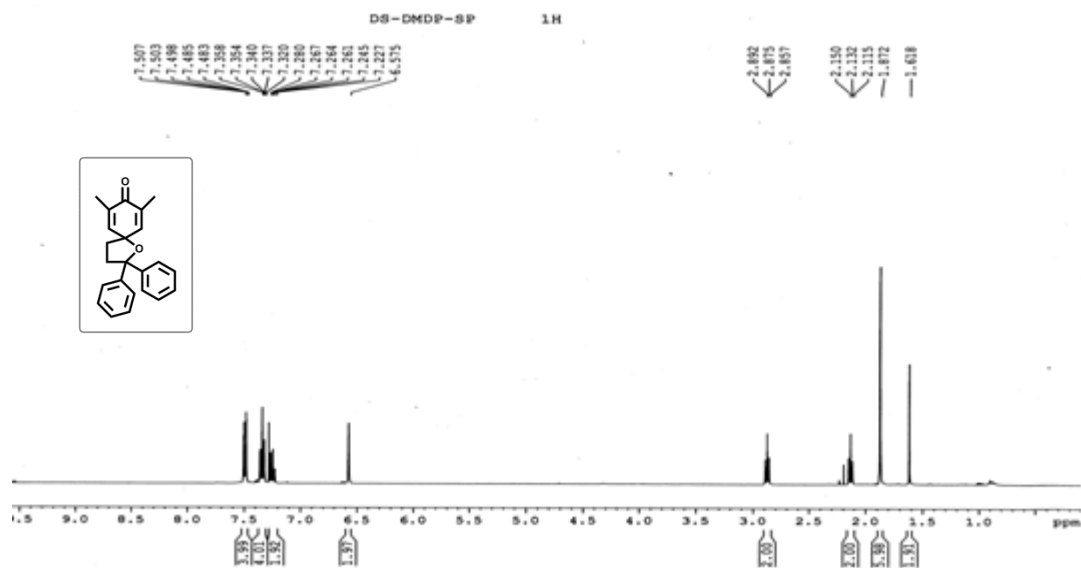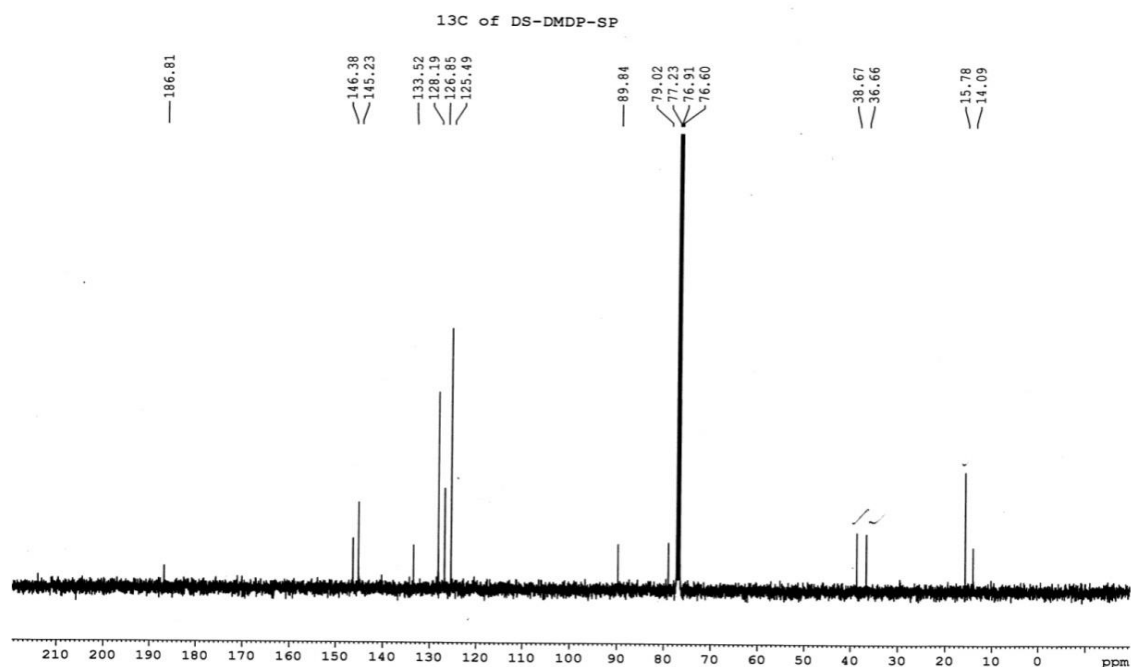

**7-bromo-9-methoxy-2,2-dimethyl-1-oxaspiro[4.5]deca-6,9-dien-8-one (12a)**

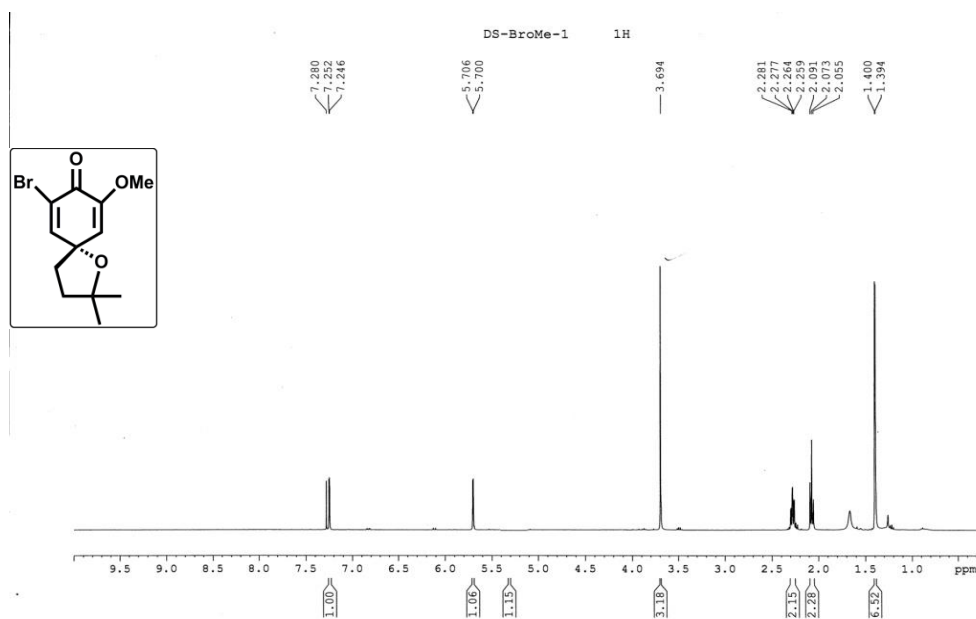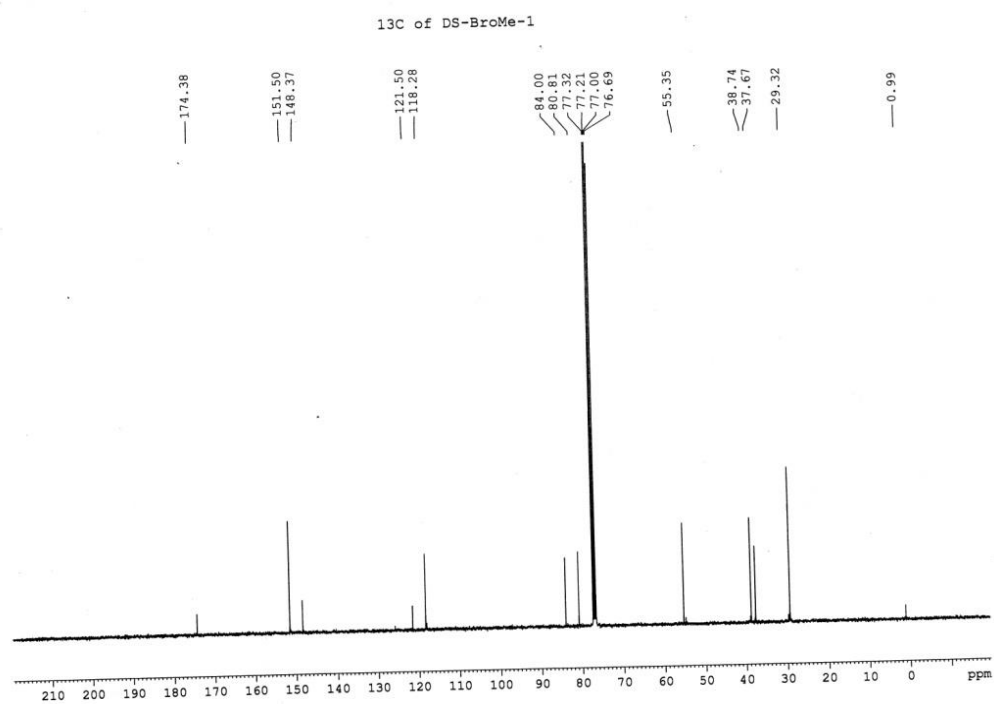

7-methoxy-2,2-dimethyl-1-oxaspiro[4.5]deca-6,9-dien-8-one(11a)

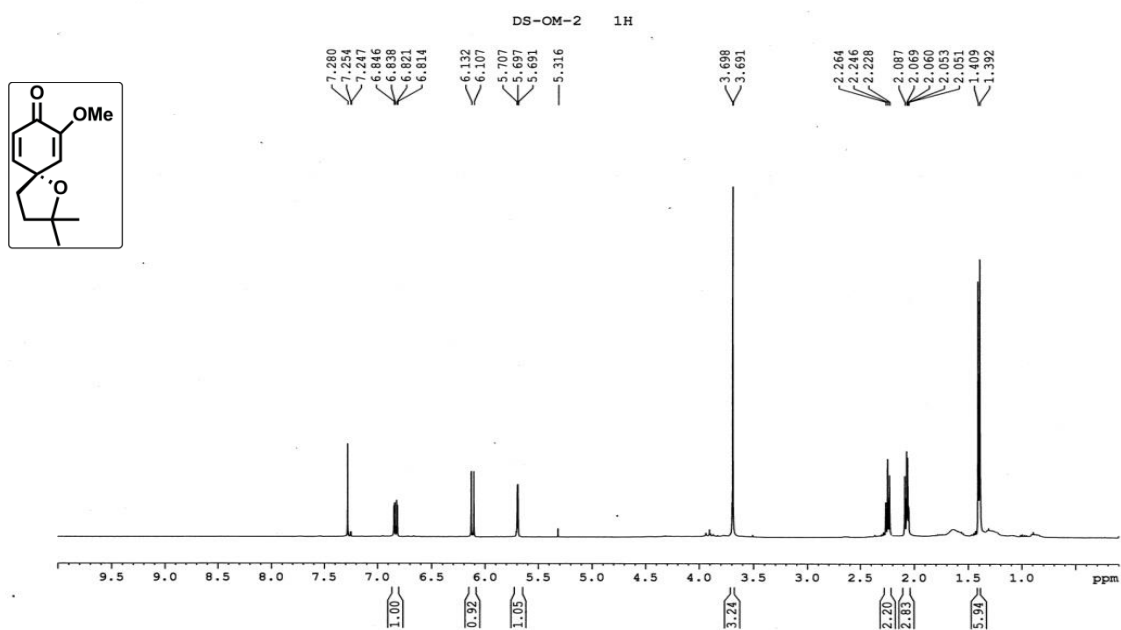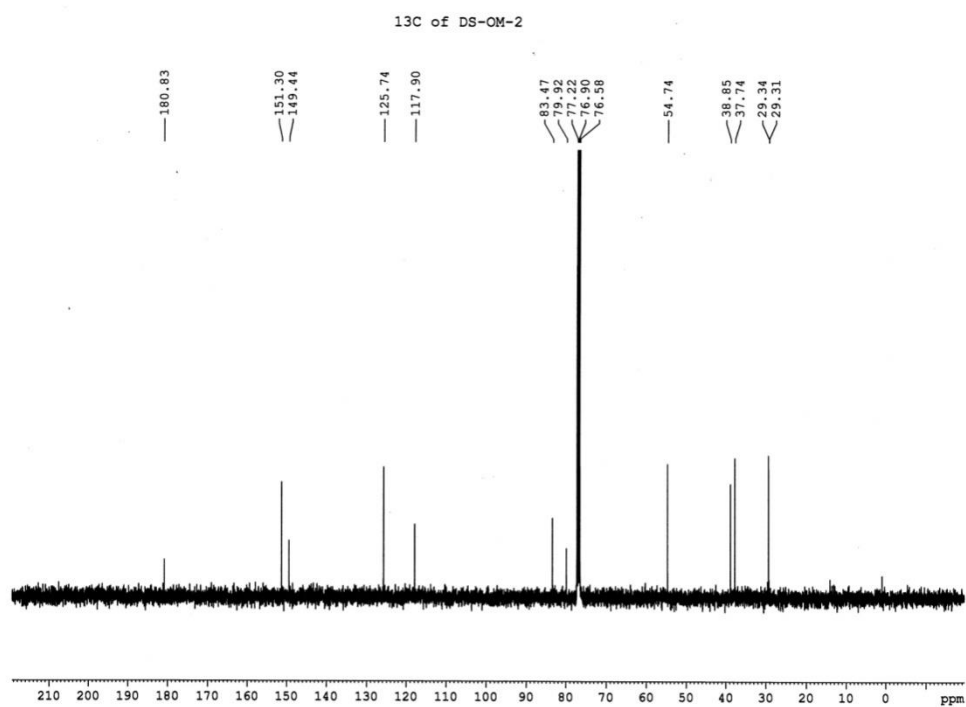

DS-V(Ben) -F 1H

Chemical structure of DS-V(Ben) is shown in the inset:

COC1=CC=C(C(=O)C1)C2CCc3ccccc3C2

1H NMR spectrum (CDCl<sub>3</sub>) data:

| Chemical Shift (ppm)                                                                                                                                            | Integration |
|-----------------------------------------------------------------------------------------------------------------------------------------------------------------|-------------|
| 7.364, 7.361, 7.344, 7.340, 7.326, 7.315, 7.311, 7.302, 7.287, 7.284, 7.280, 7.268, 6.245, 6.239, 6.221, 6.214, 5.998, 5.993                                    | 10.94       |
| 5.116, 5.109                                                                                                                                                    | 1.00        |
| 3.828, 3.468, 3.044, 3.034, 3.010, 3.000, 2.986, 2.982, 2.903, 2.898, 2.869, 2.175, 2.157, 2.139, 1.826, 1.811, 1.794, 1.776, 1.682, 1.664, 1.650, 1.645, 1.632 | 2.99        |
| 2.07                                                                                                                                                            | 2.86        |
| 1.10, 1.24                                                                                                                                                      | 1.69        |
| 0.092                                                                                                                                                           | 0.96        |

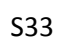

(2R,5R)/(2S,5S)-7-methoxy-2-methyl-1-oxaspiro[4.5]deca-6,9-dien-8-one (14a)

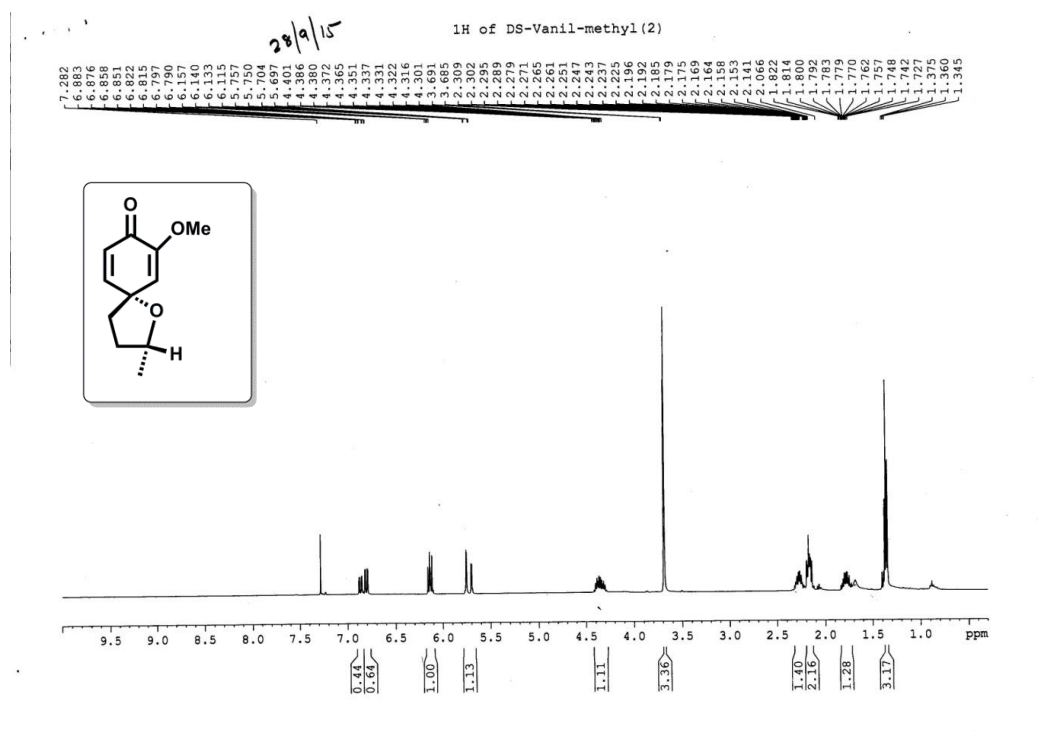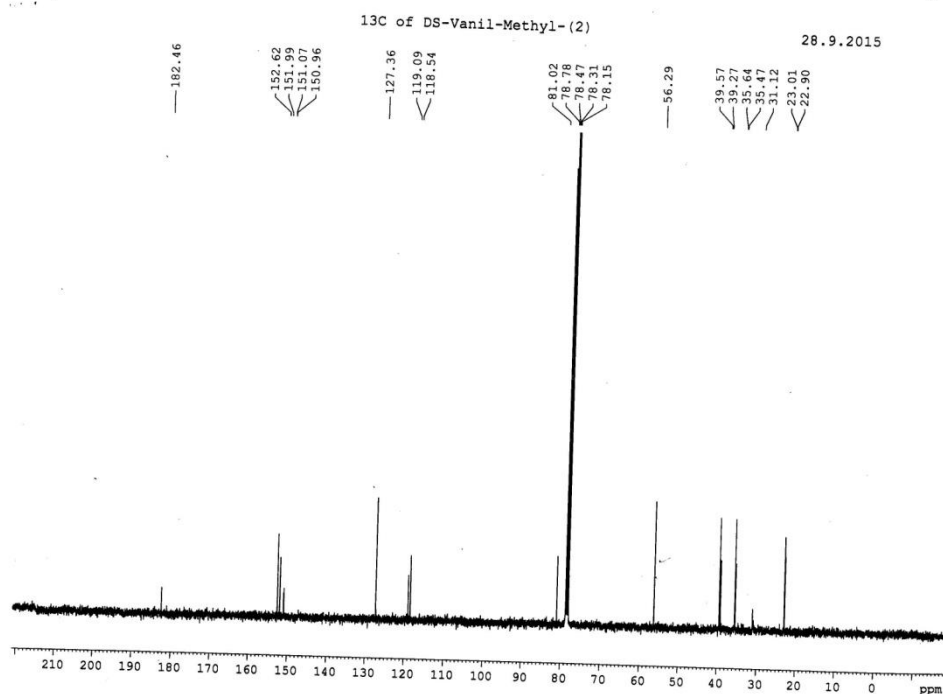

(2R, 5S) / (2S,5R)-7-bromo-9-methoxy-2-methyl-1-oxaspiro[4.5]deca-6,9-dien-8-one (15a)

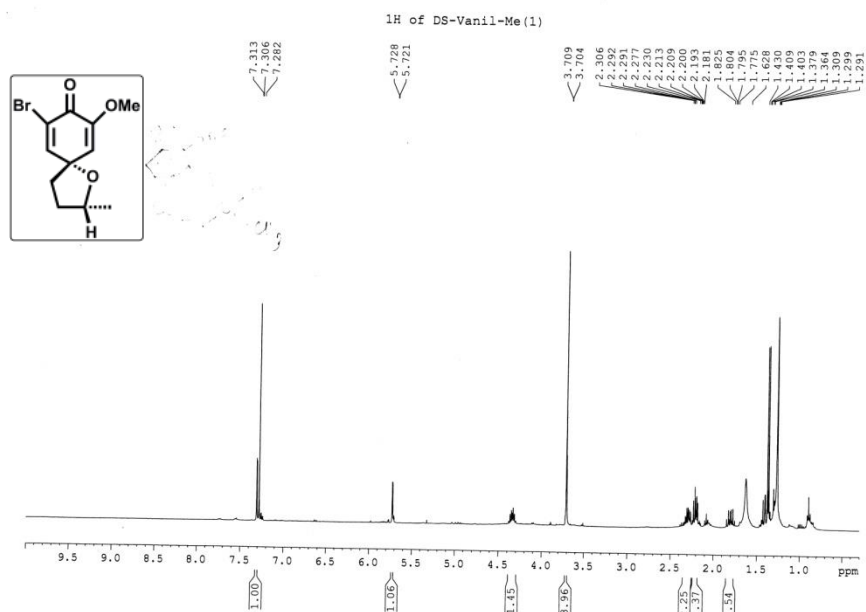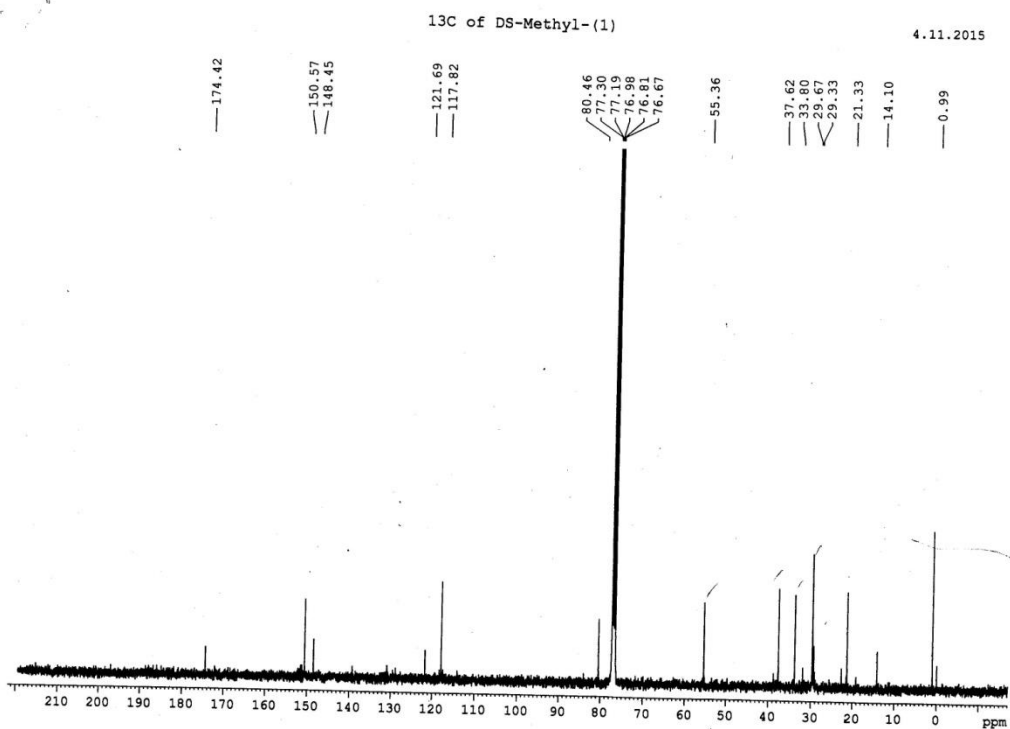

(2S, 5R)/ (2R,5S)-7-methoxy-2-phenyl-1-oxaspiro[4.5]deca-6,9-dien-8-one (14b)

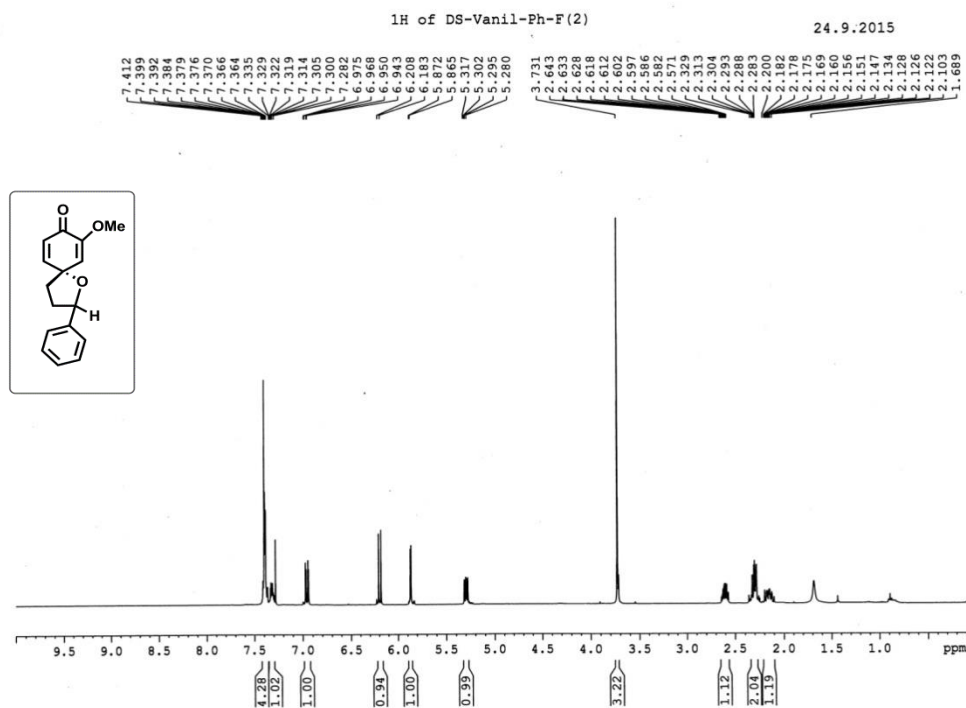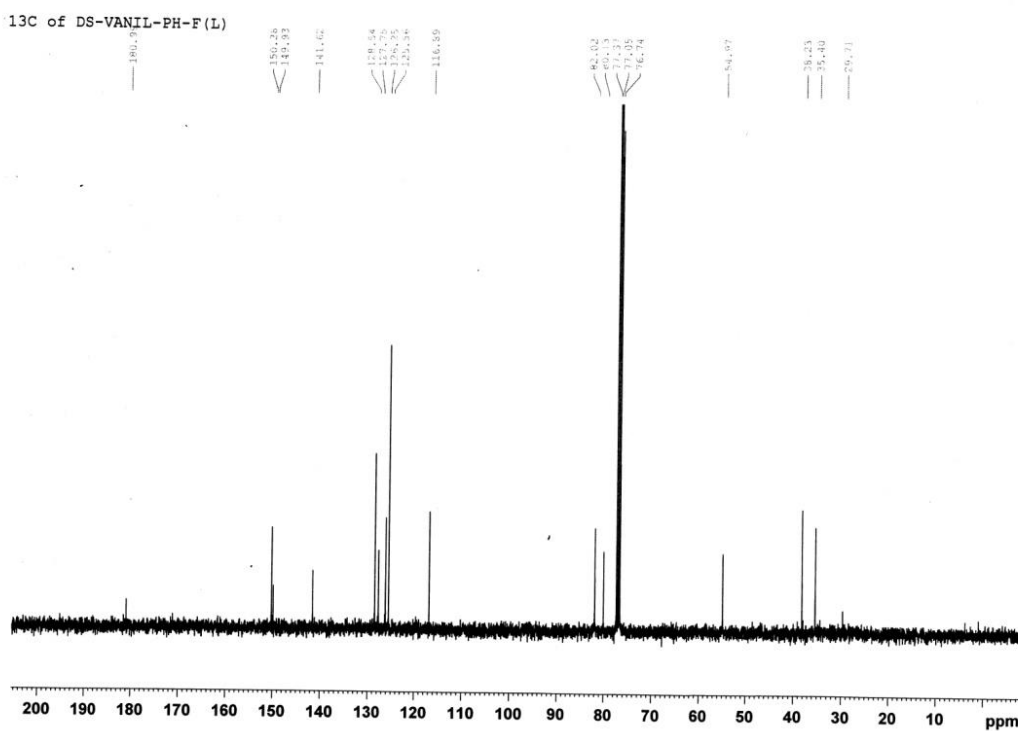



(2S, 5S)/ (2R, 5R)-7-bromo-9-methoxy-2-phenyl-1-oxaspiro[4.5]deca-6,9-dien-8-one (15b)

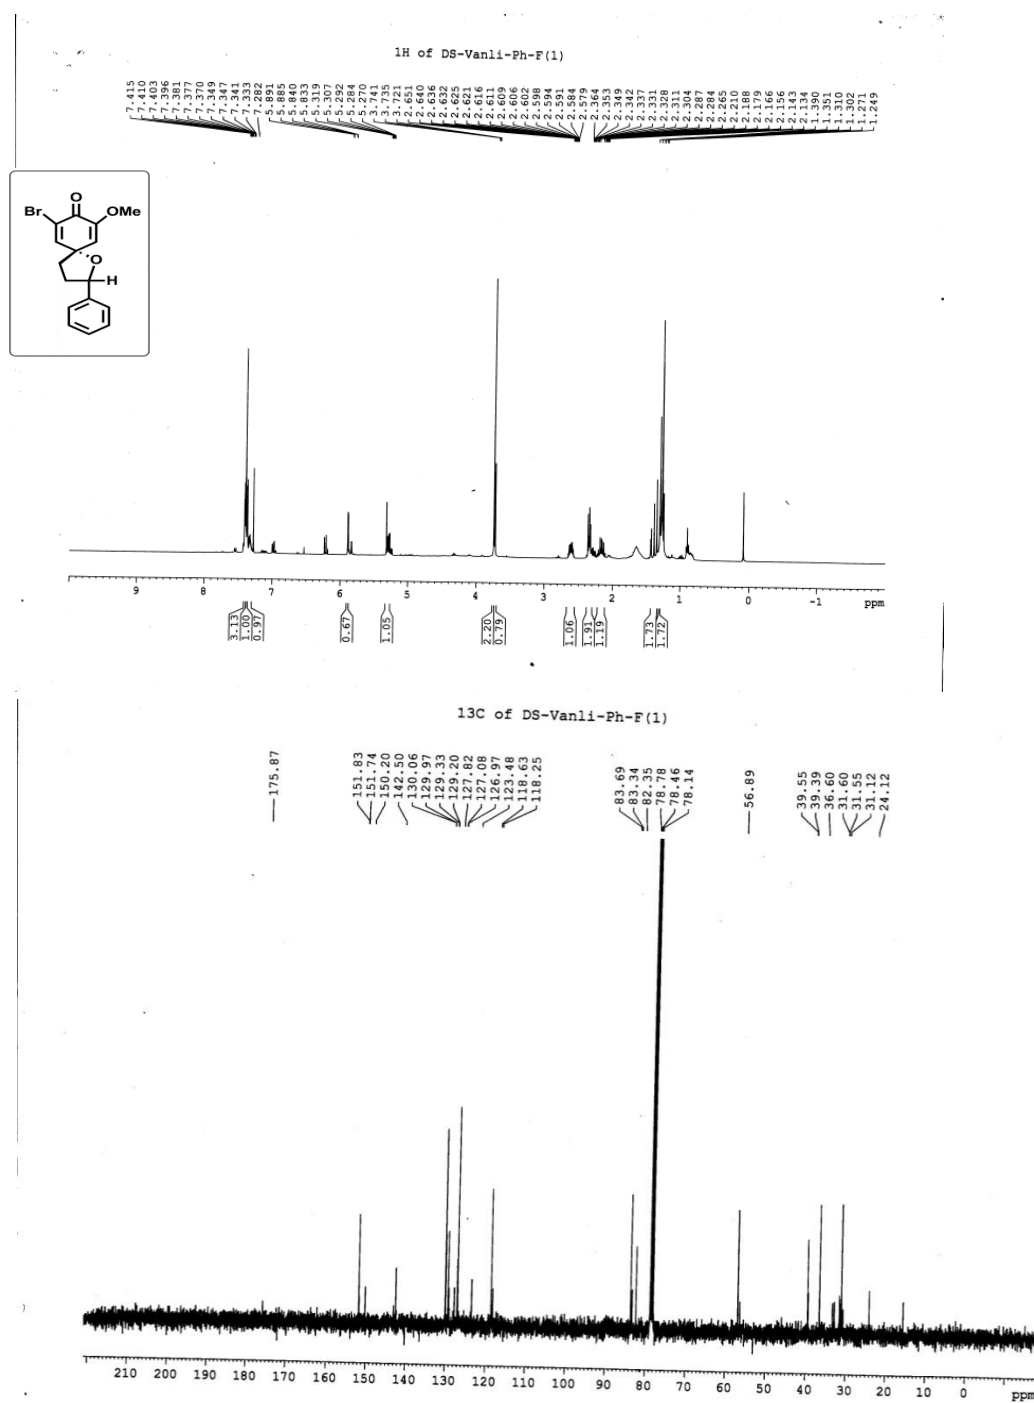

**(2S, 5R/ (2R, 5S))-2-benzyl-7-methoxy-1-oxaspiro [4.5]deca-6,9-dien-8-one (14c)**

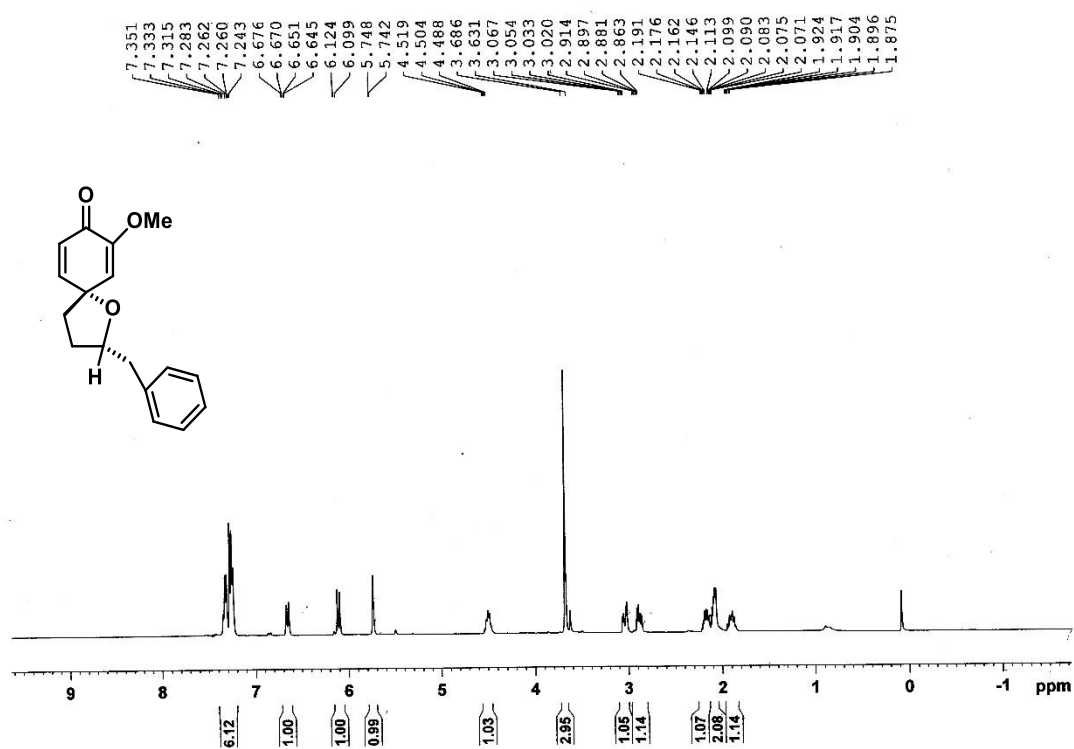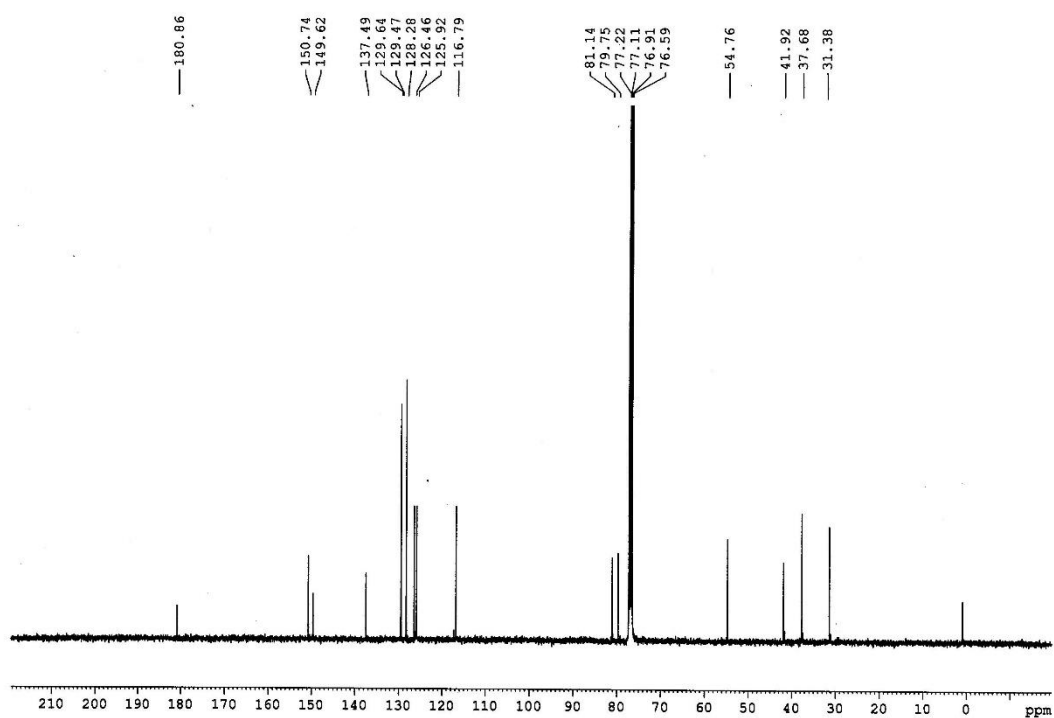

2'H,3H-spiro[furan-2,1'-naphthalene]-2',5(4H)-dione from naphthol ester (17)

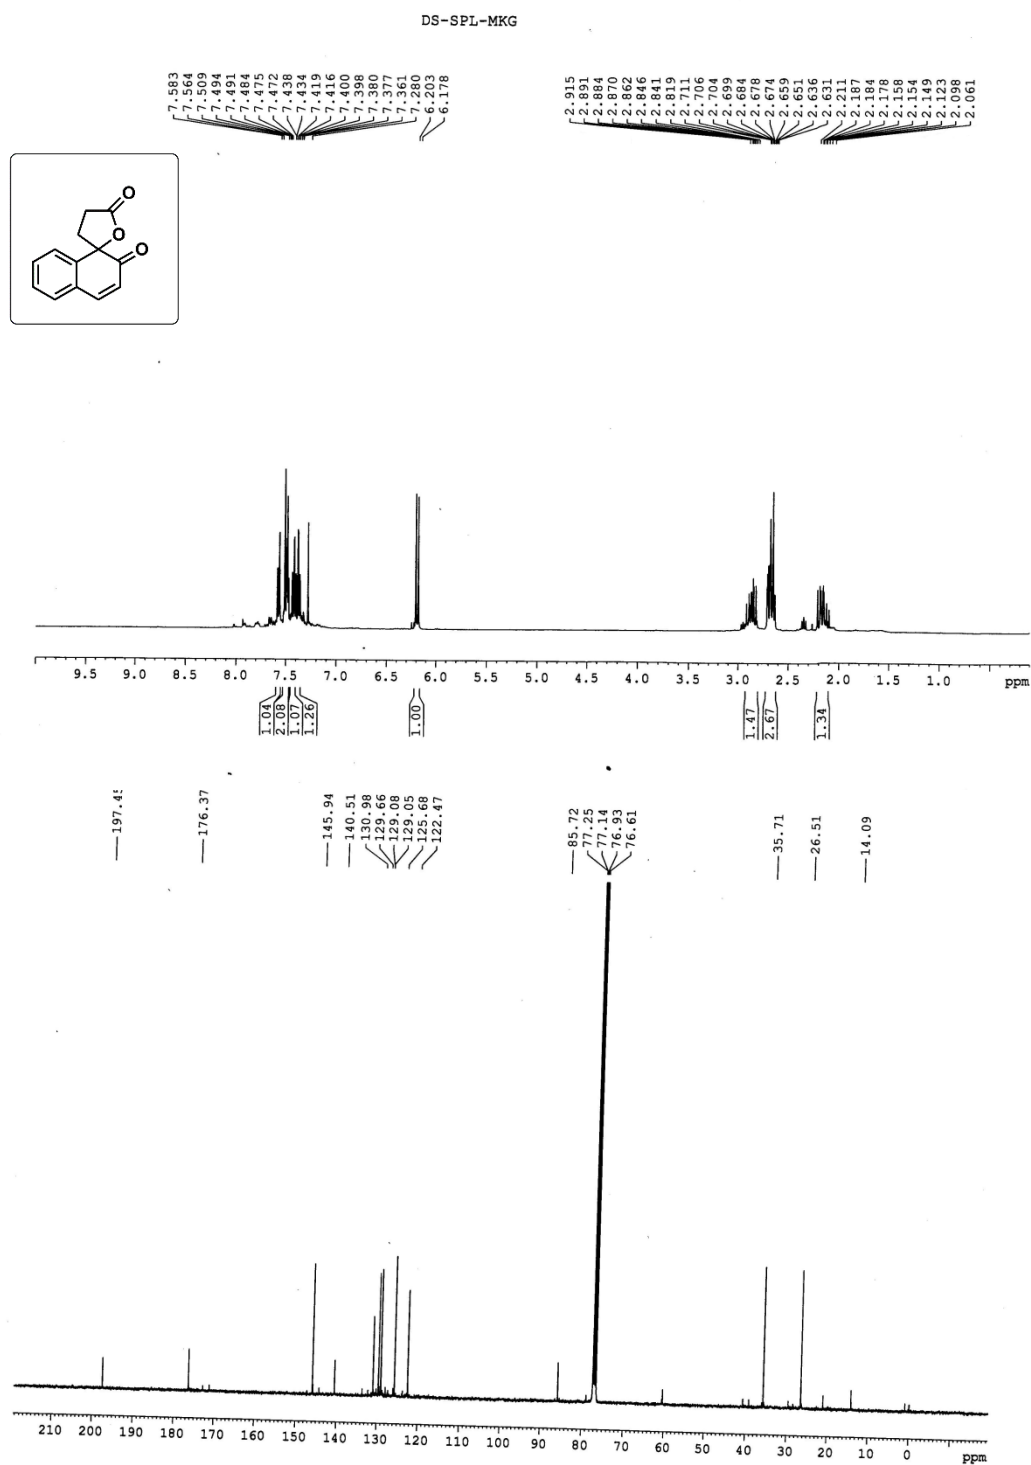

# NOE Experimental spectra

## NOE of (1'S,5S)-5-methyl-4,5-dihydro-2'H,3H-spiro[furan-2,1'-naphthalen]-2'-one (6a)

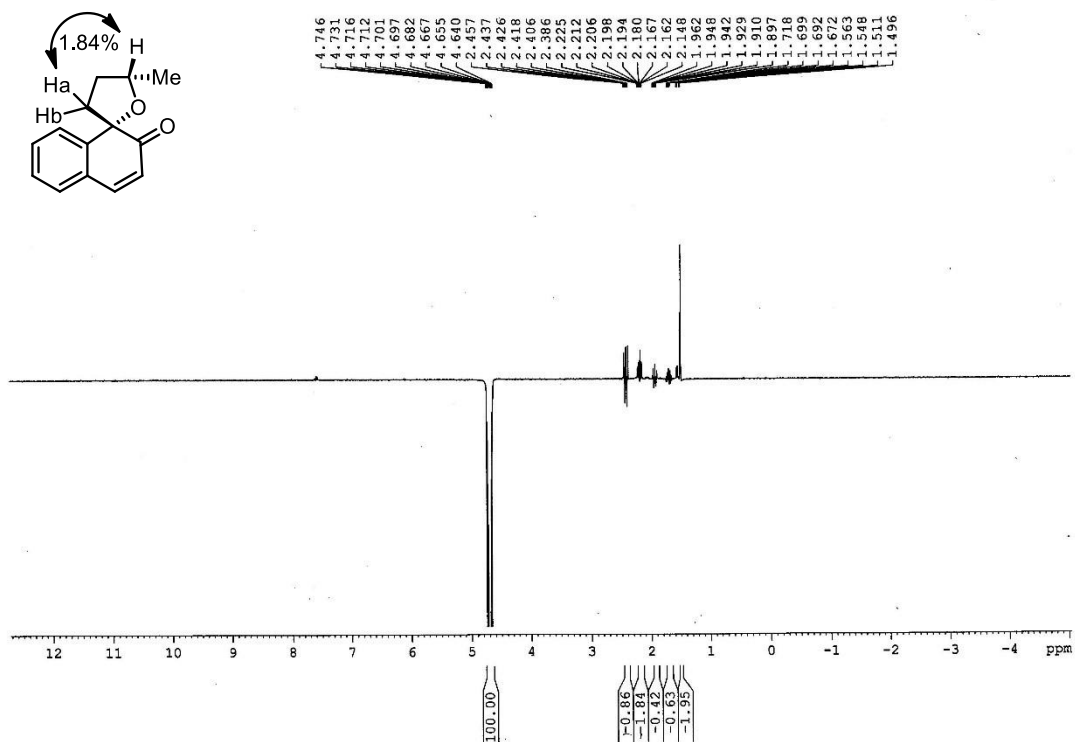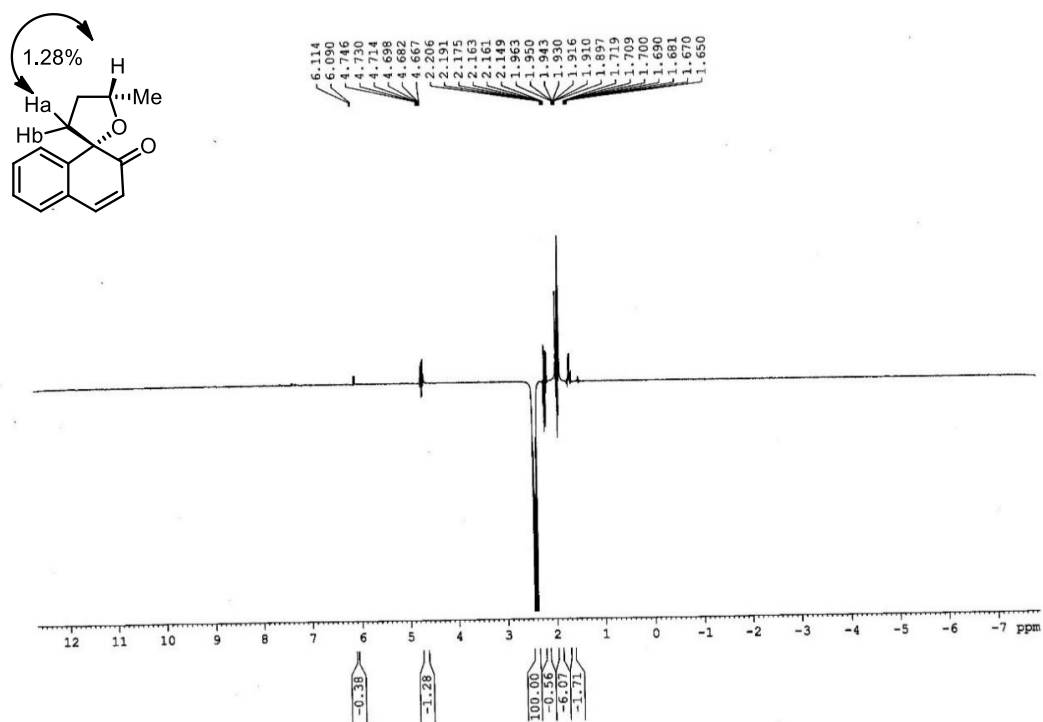

# NOE of (1*S*,5*R*)-5-methyl-4,5-dihydro-2'*H*,3*H*-spiro[furan-2,1'-naphthalen]-2'-one (7a)

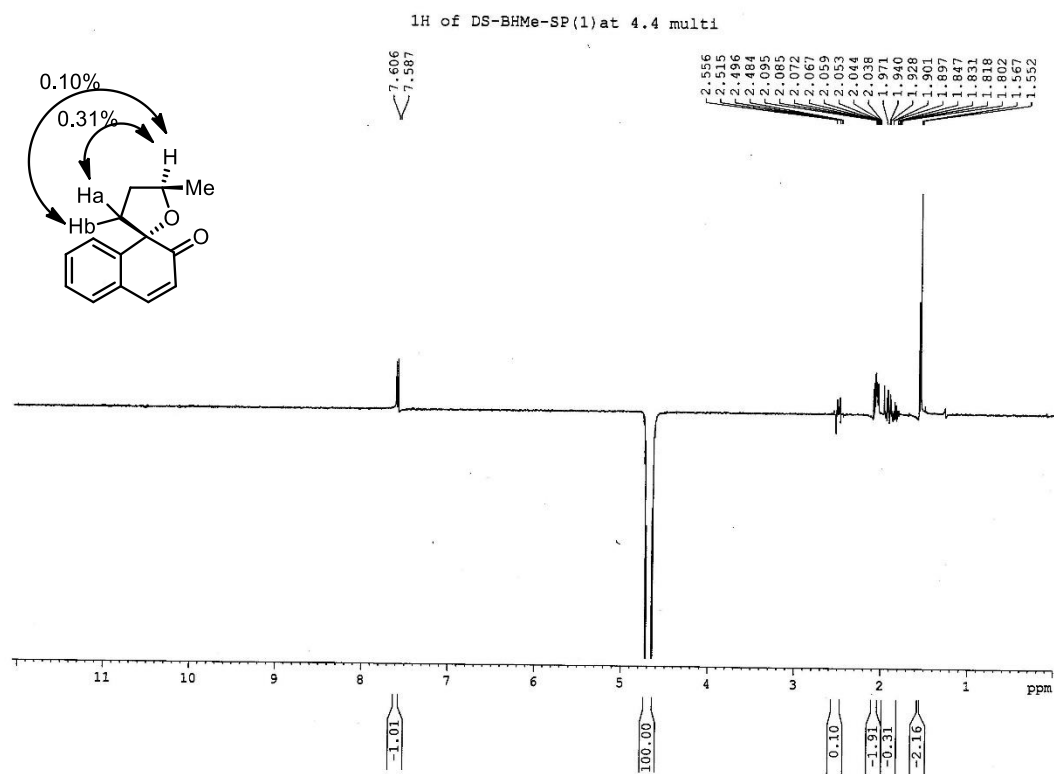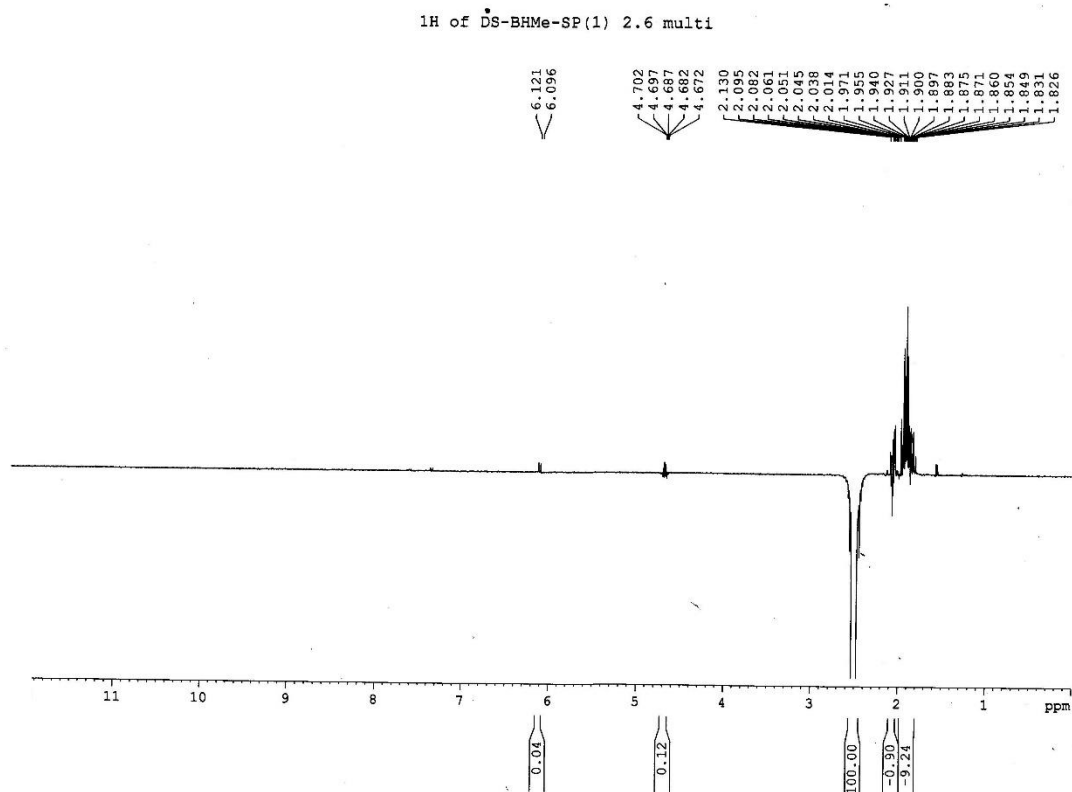

# NOE of (1'S,5S)-5-benzyl-4,5-dihydro-2'H,3H-spiro[furan-2,1'-naphthalen]-2'-one (7c)

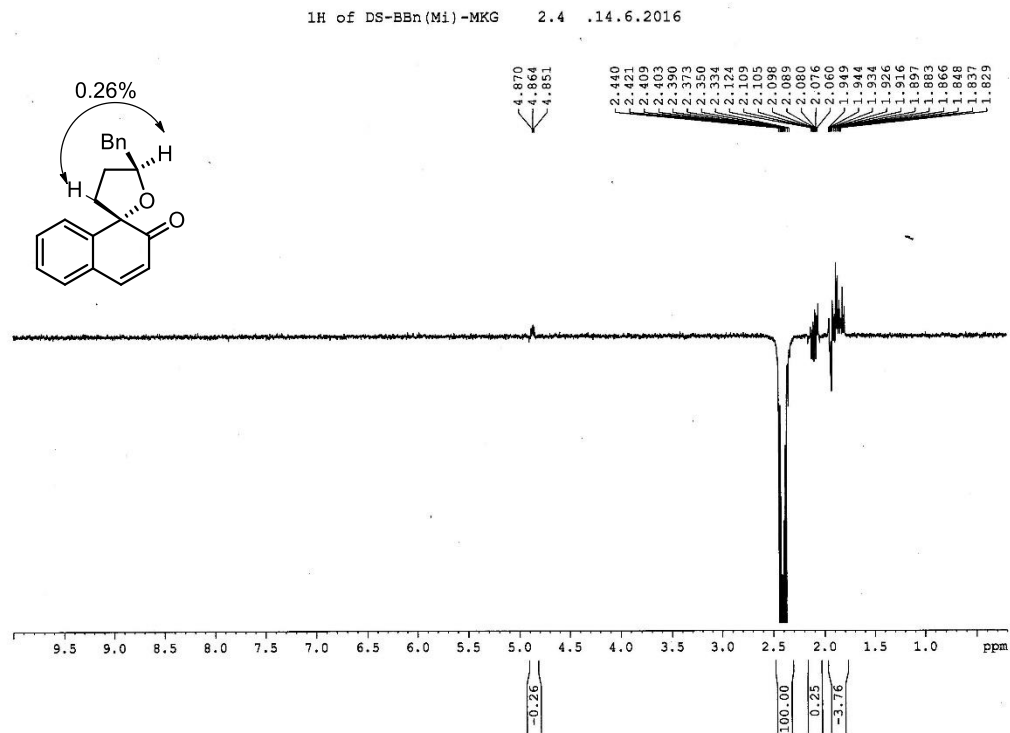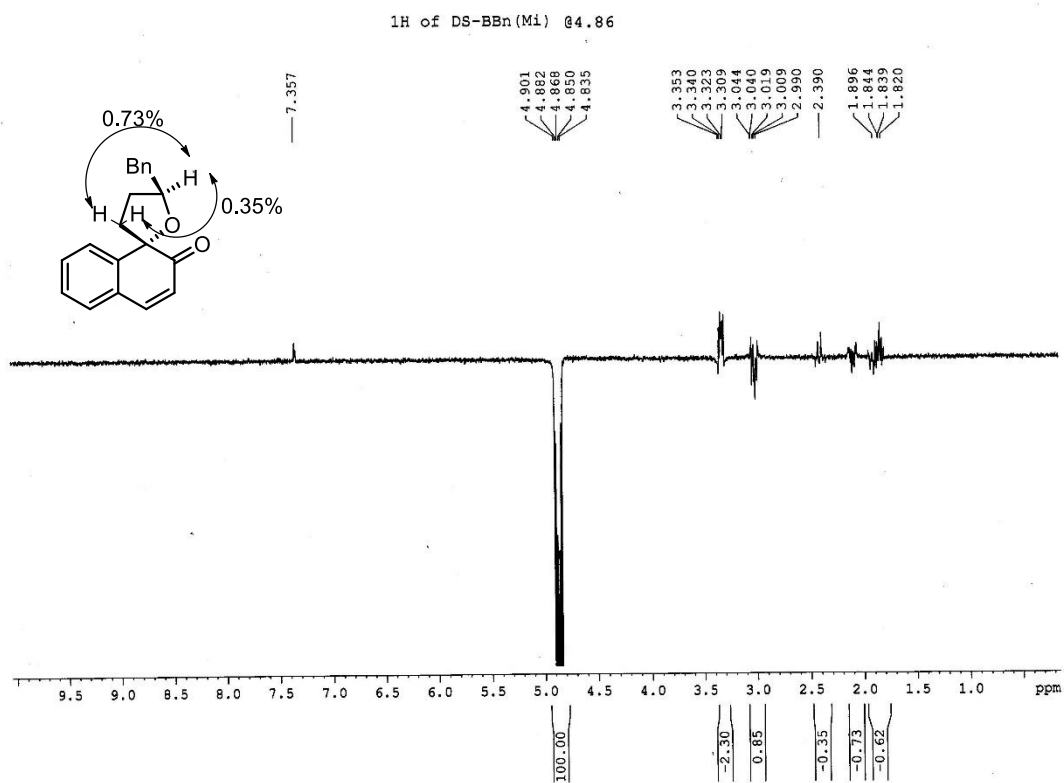

# NOE of (1'S,5R)-5-phenyl-4,5-dihydro-2'H,3H-spiro[furan-2,1'-naphthalen]-2'-one (6d)

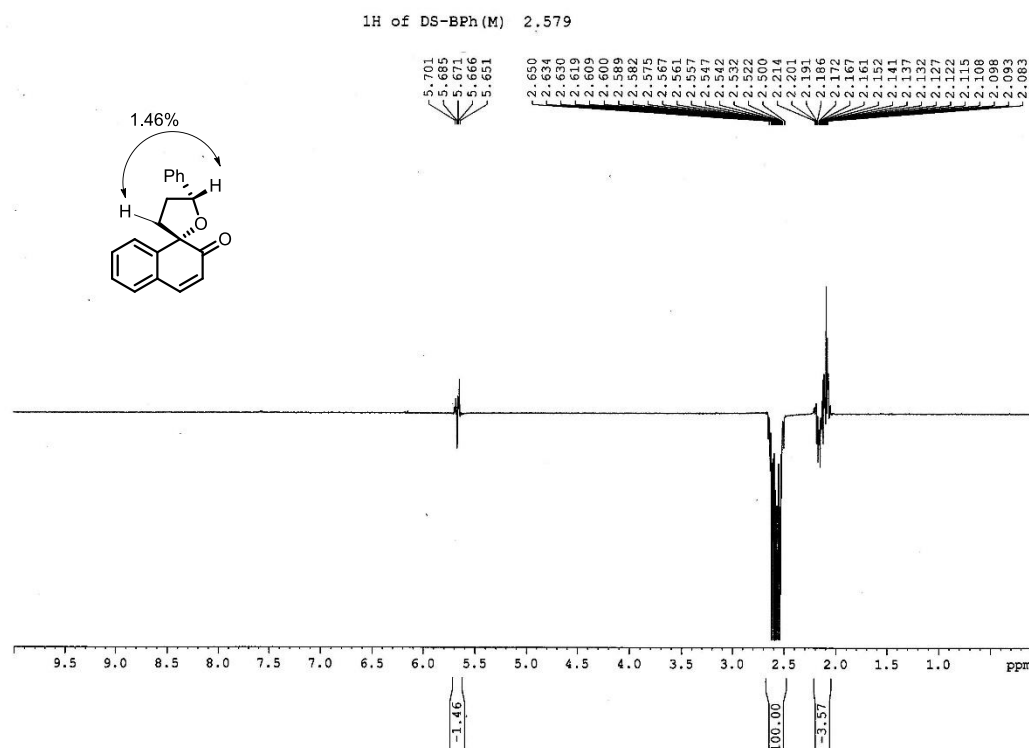

# NOE of (5R)-7-methoxy-2-phenyl-1-oxaspiro[4.5]deca-6,9-dien-8-one (14b)

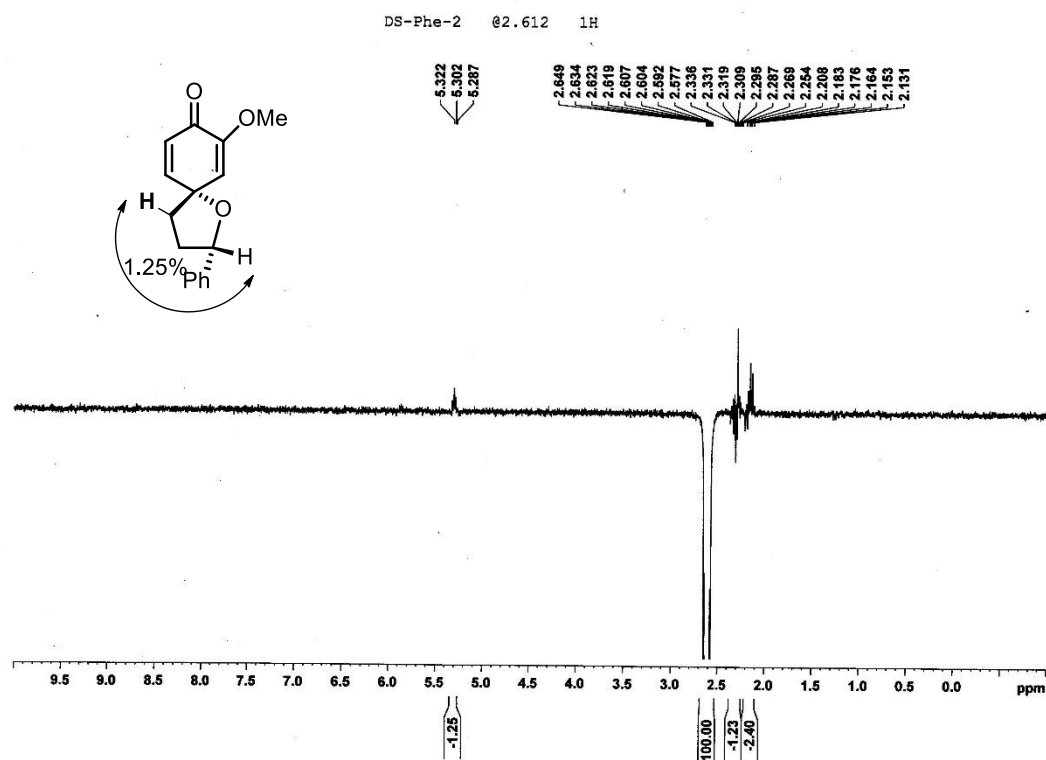

# NOE of (2R,5R)-7-methoxy-2-methyl-1-oxaspiro[4.5]deca-6,9-dien-8-one (14a)

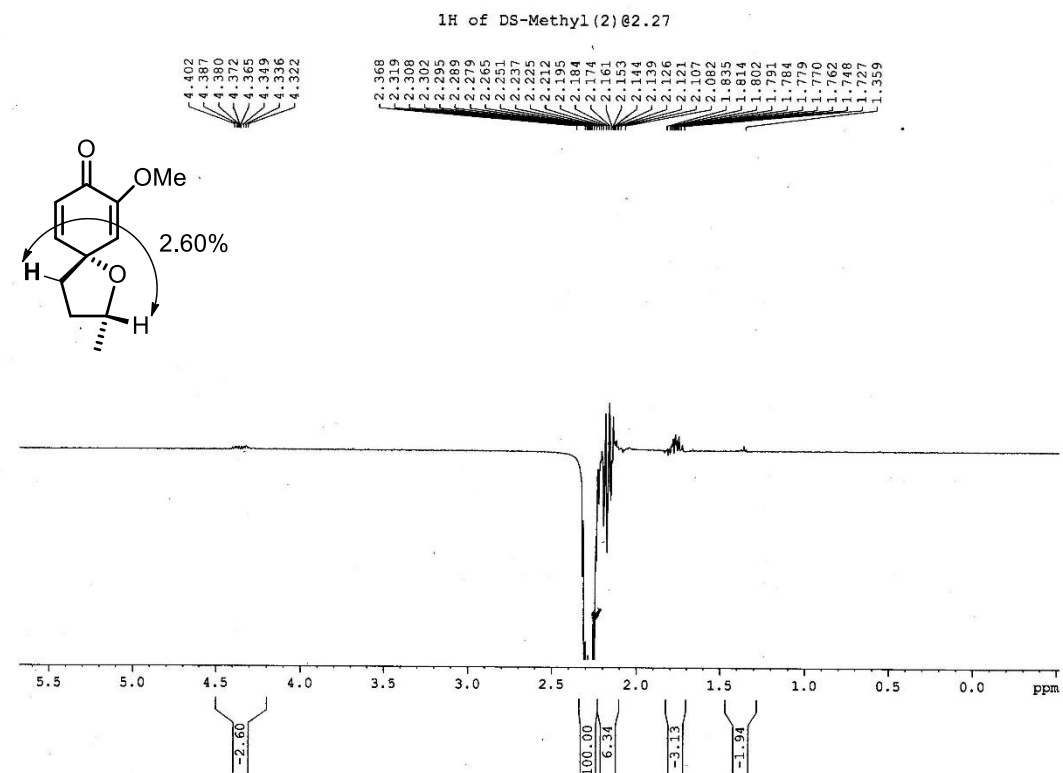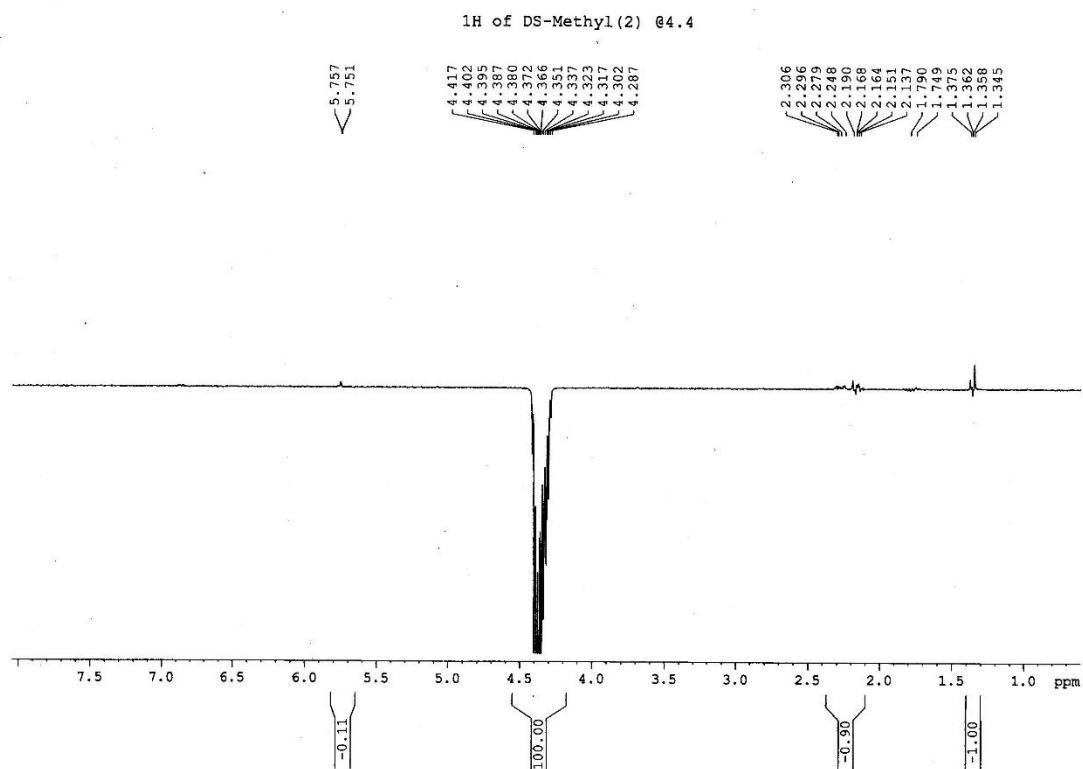



# NOE of (5R)-2-benzyl-7-methoxy-1-oxaspiro [4.5]deca-6,9-dien-8-one (14c)

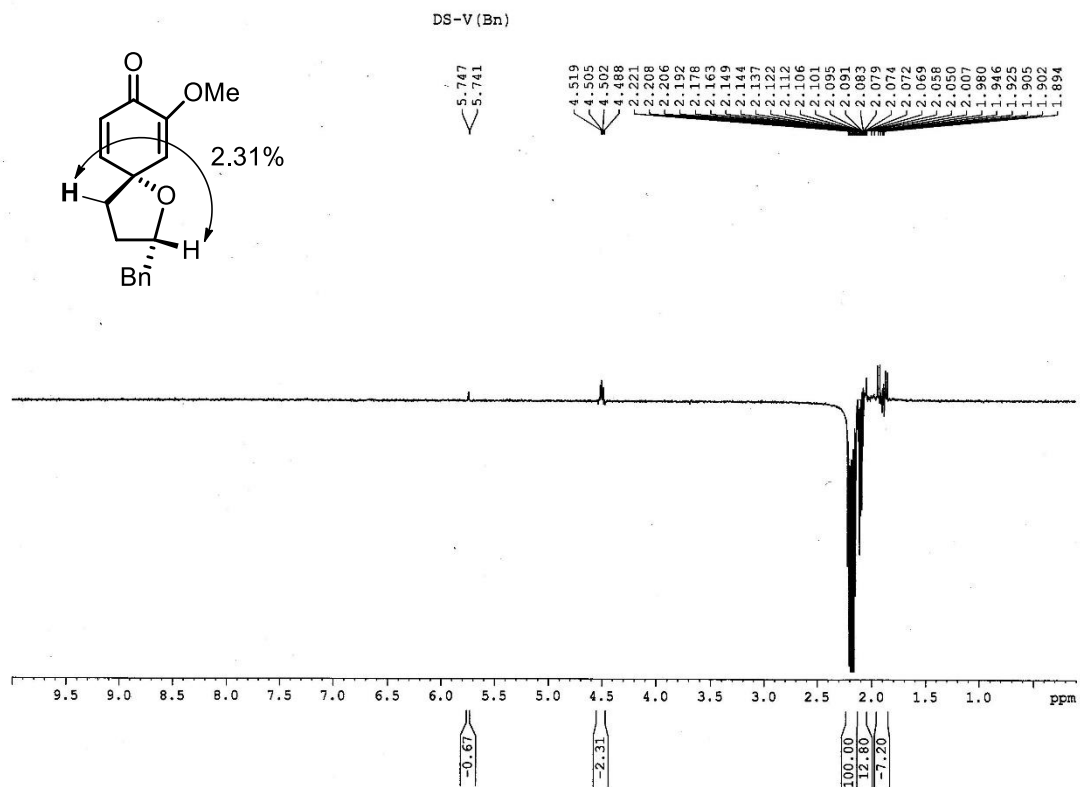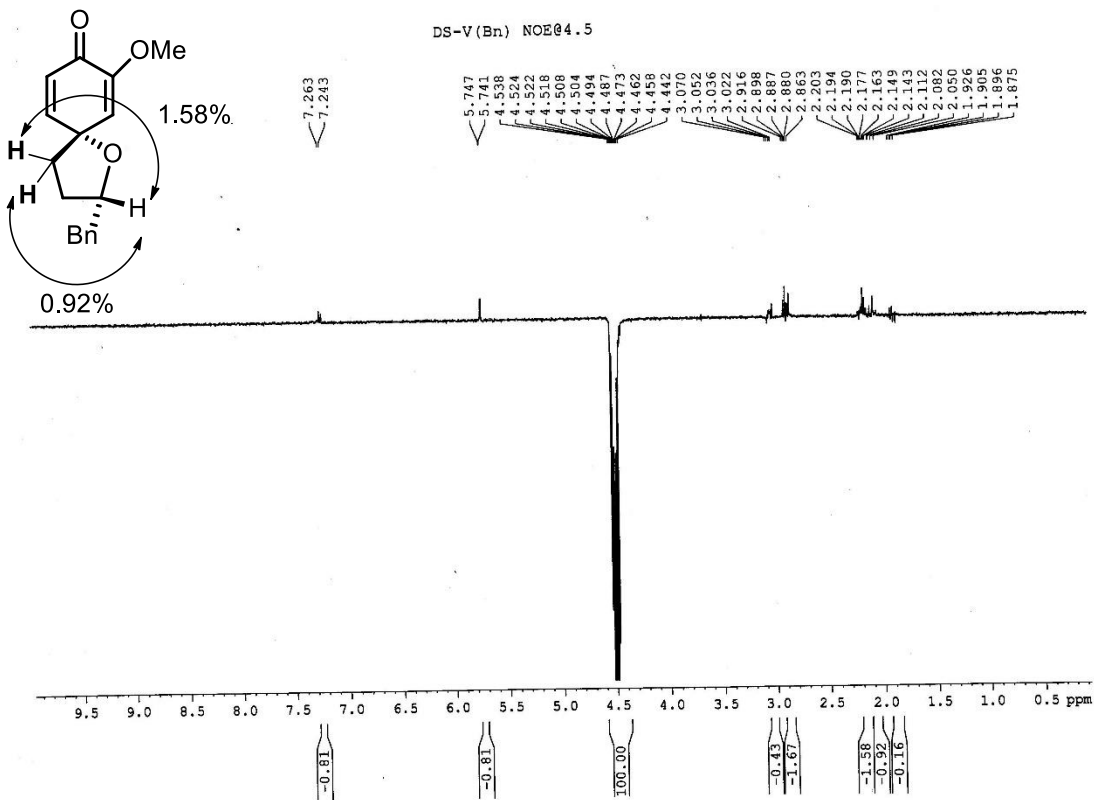

DS-V(Bn)-MKG @3.04 14.6.2016 1H

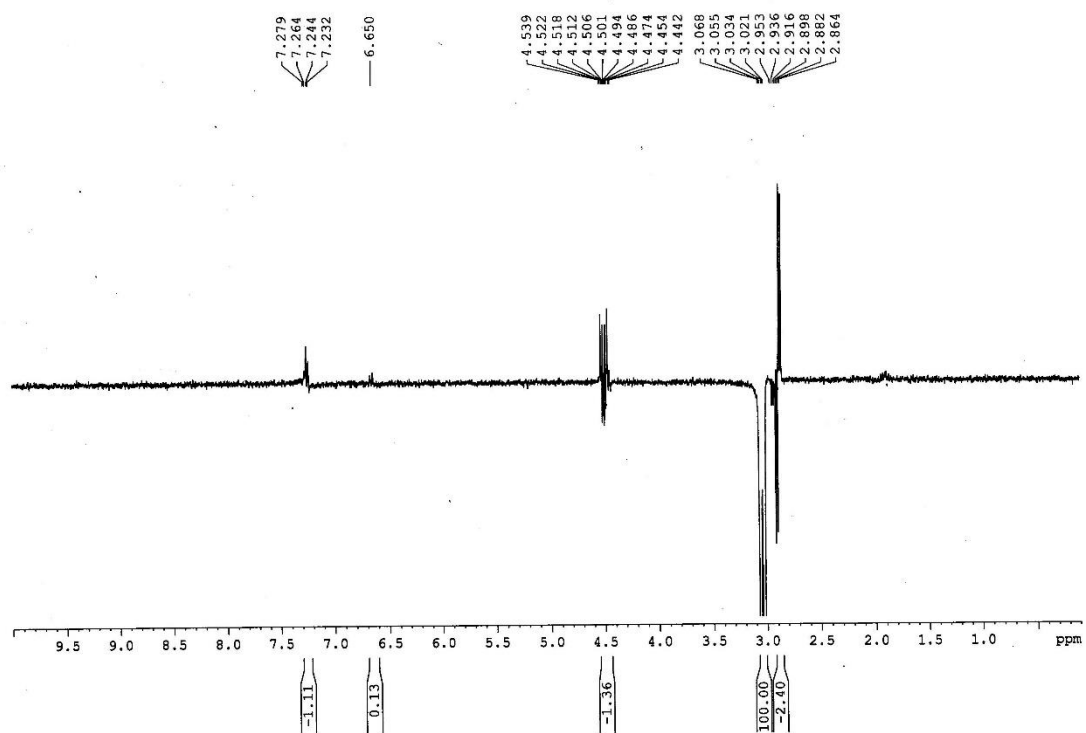

DS-V(Bn) @2.88

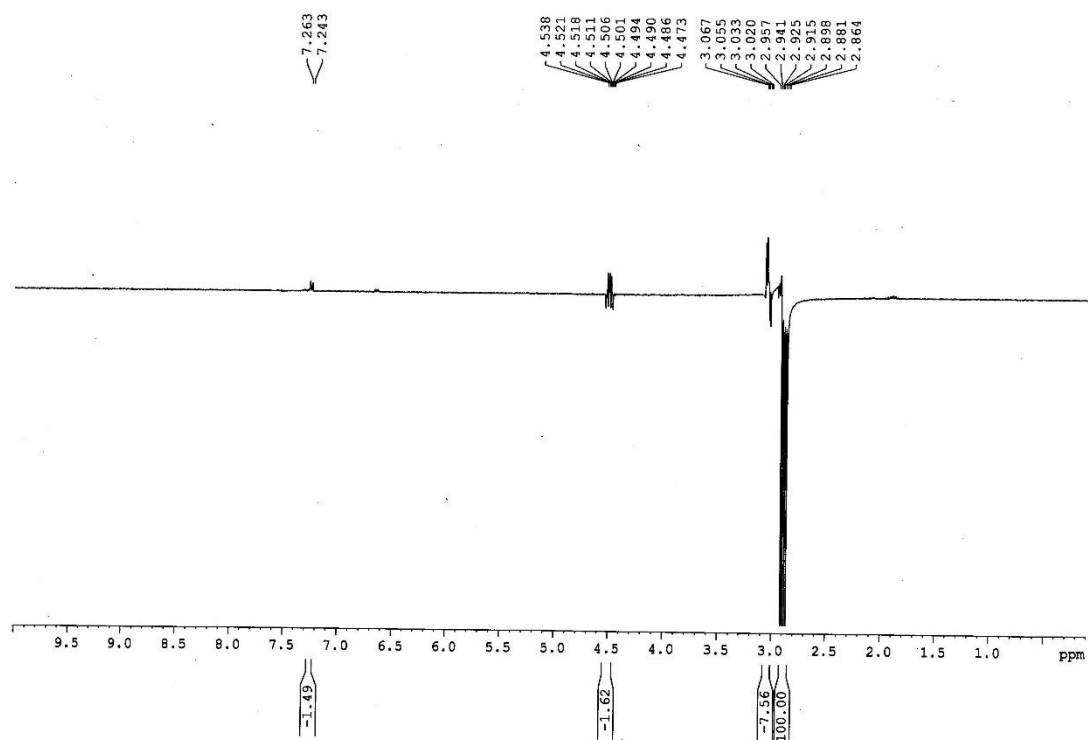

# 1-phenethylnaphthalen-2-ol (1e)

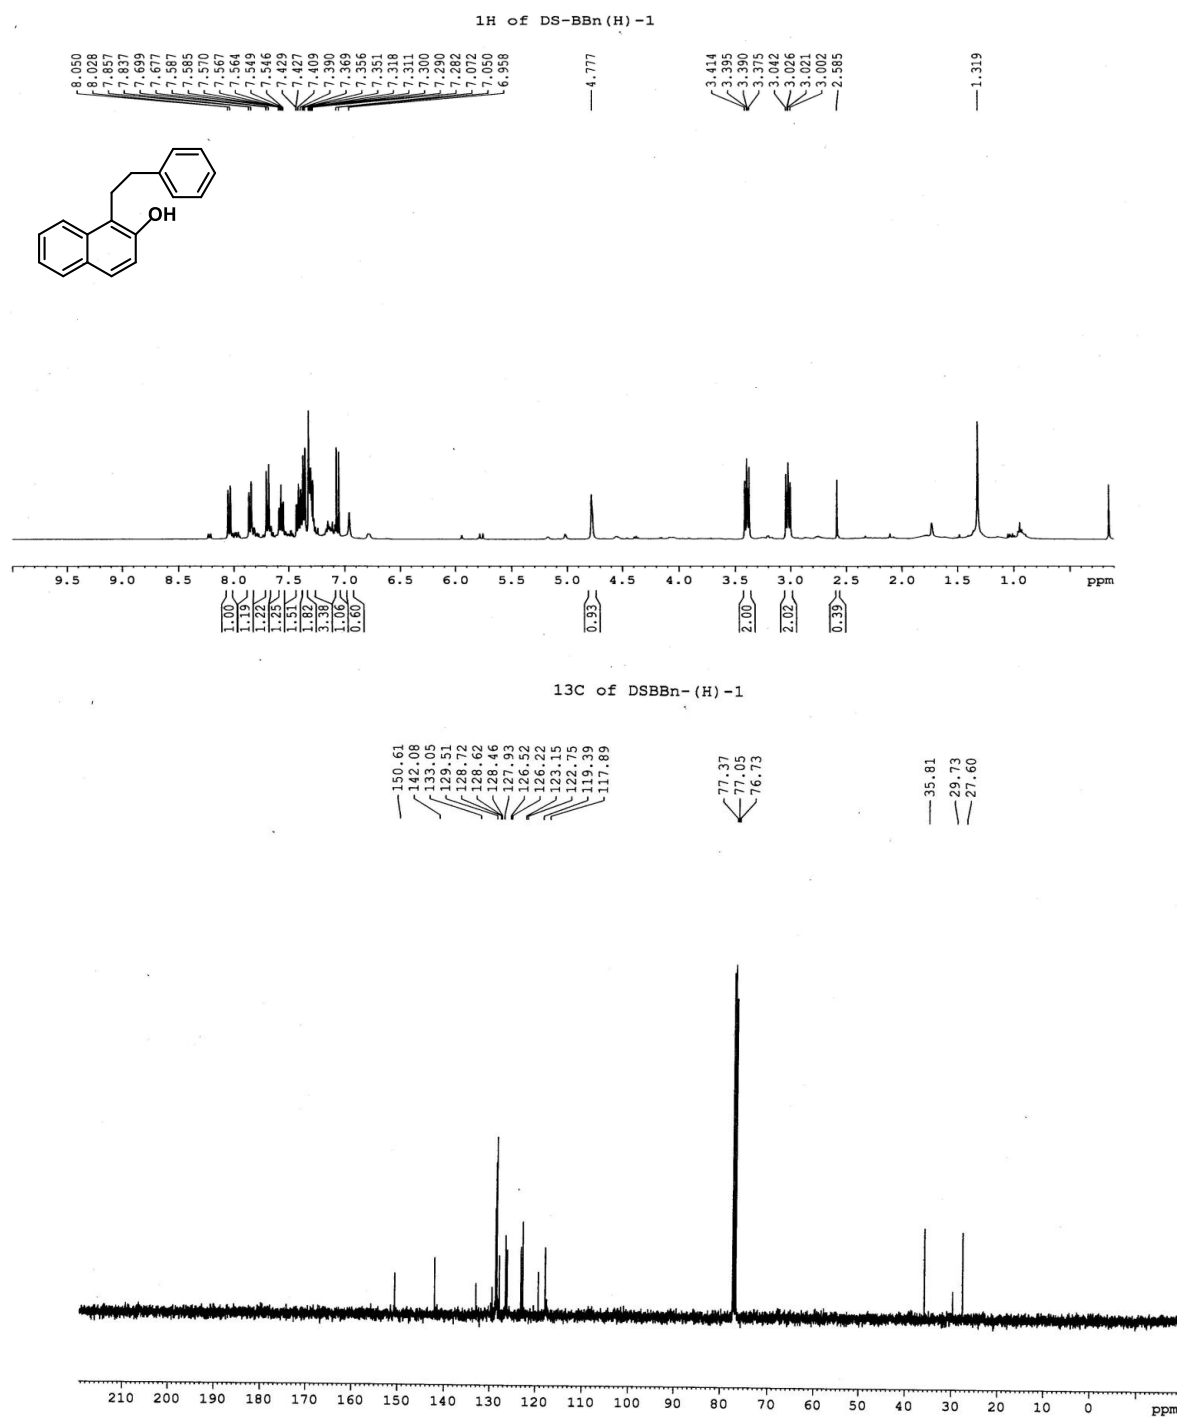

1-(4-methylphenethyl) naphthalene-2-ol (1f)

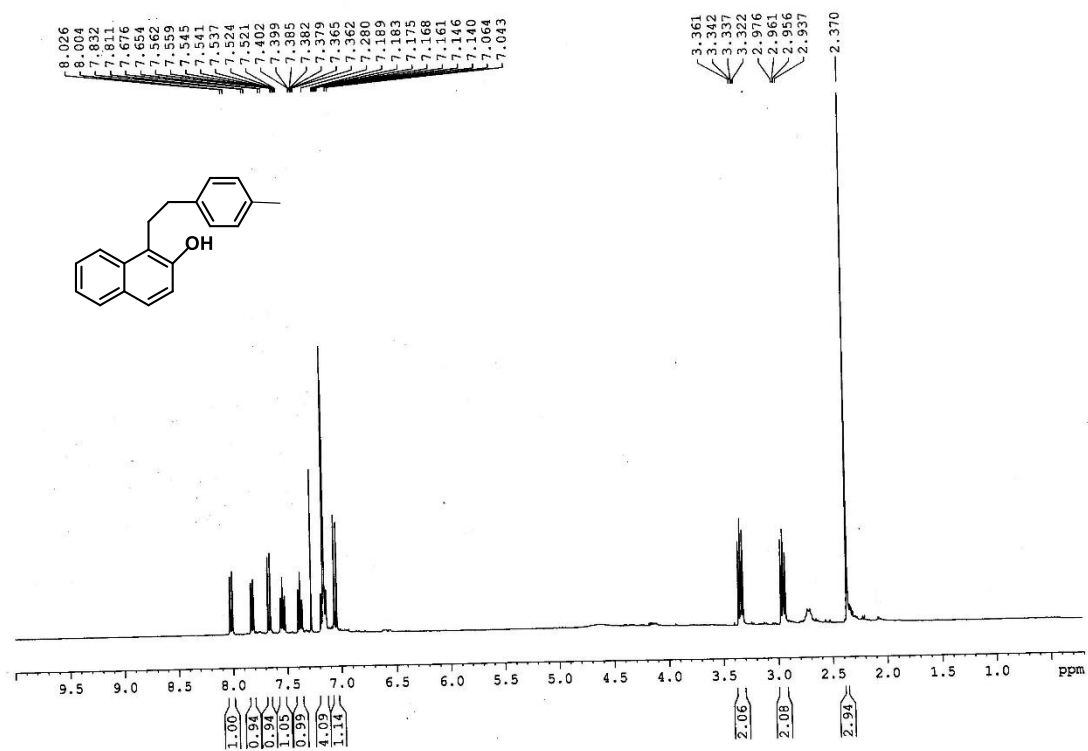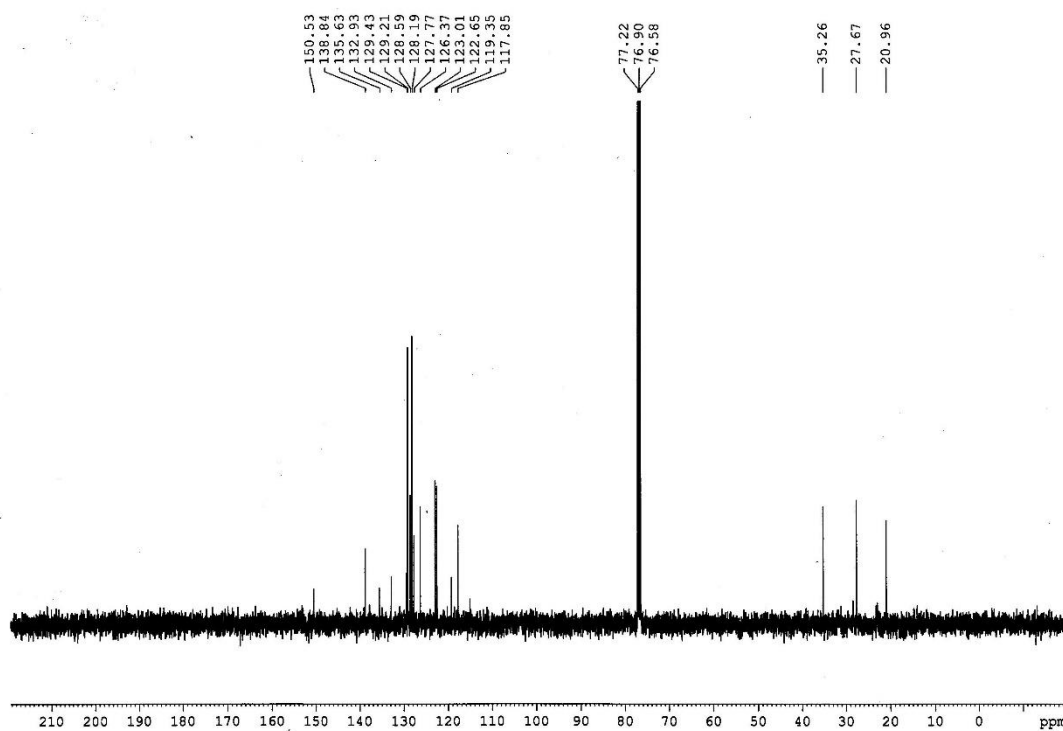

1-(3-hydroxypropyl) naphthalene-2-ol (3a)

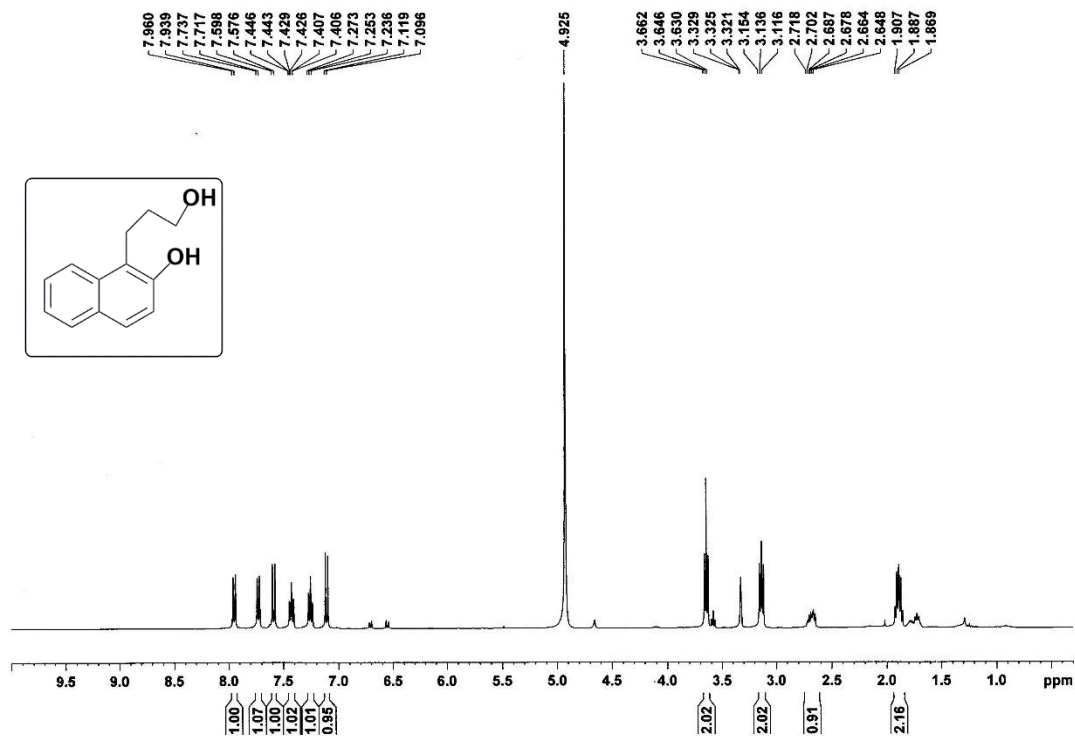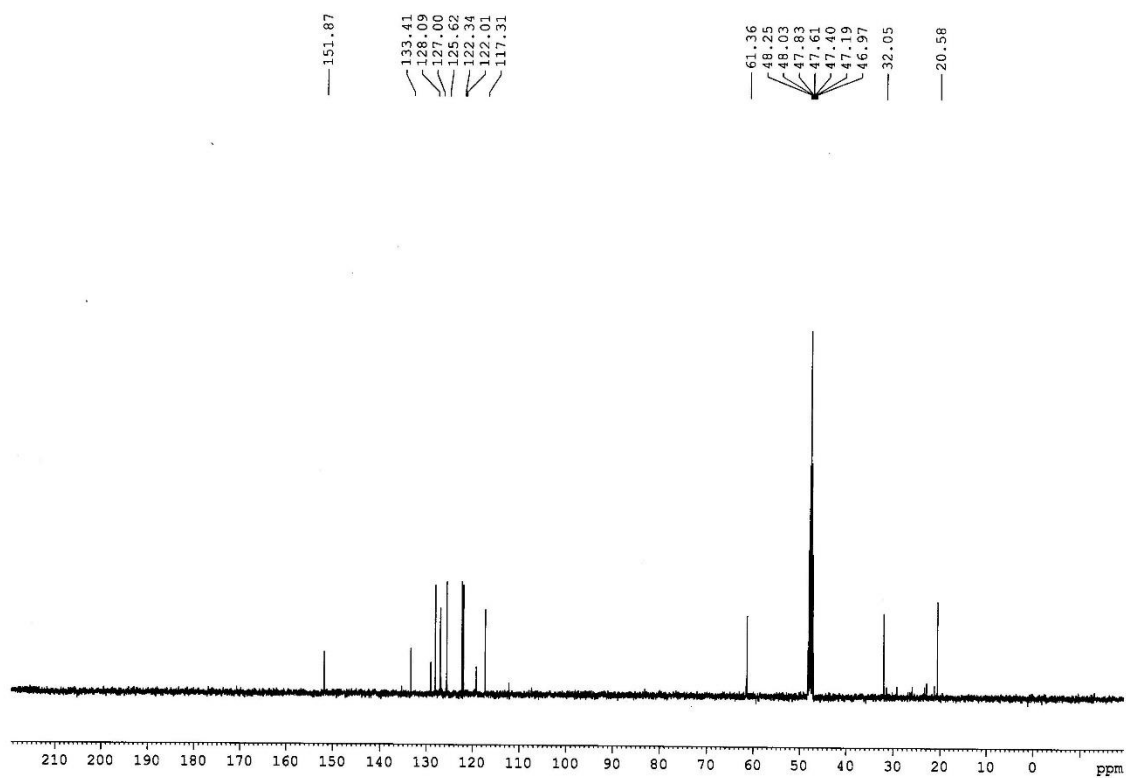

1-(3-hydroxy-3-methylbutyl) naphthalene-2-ol (3b)

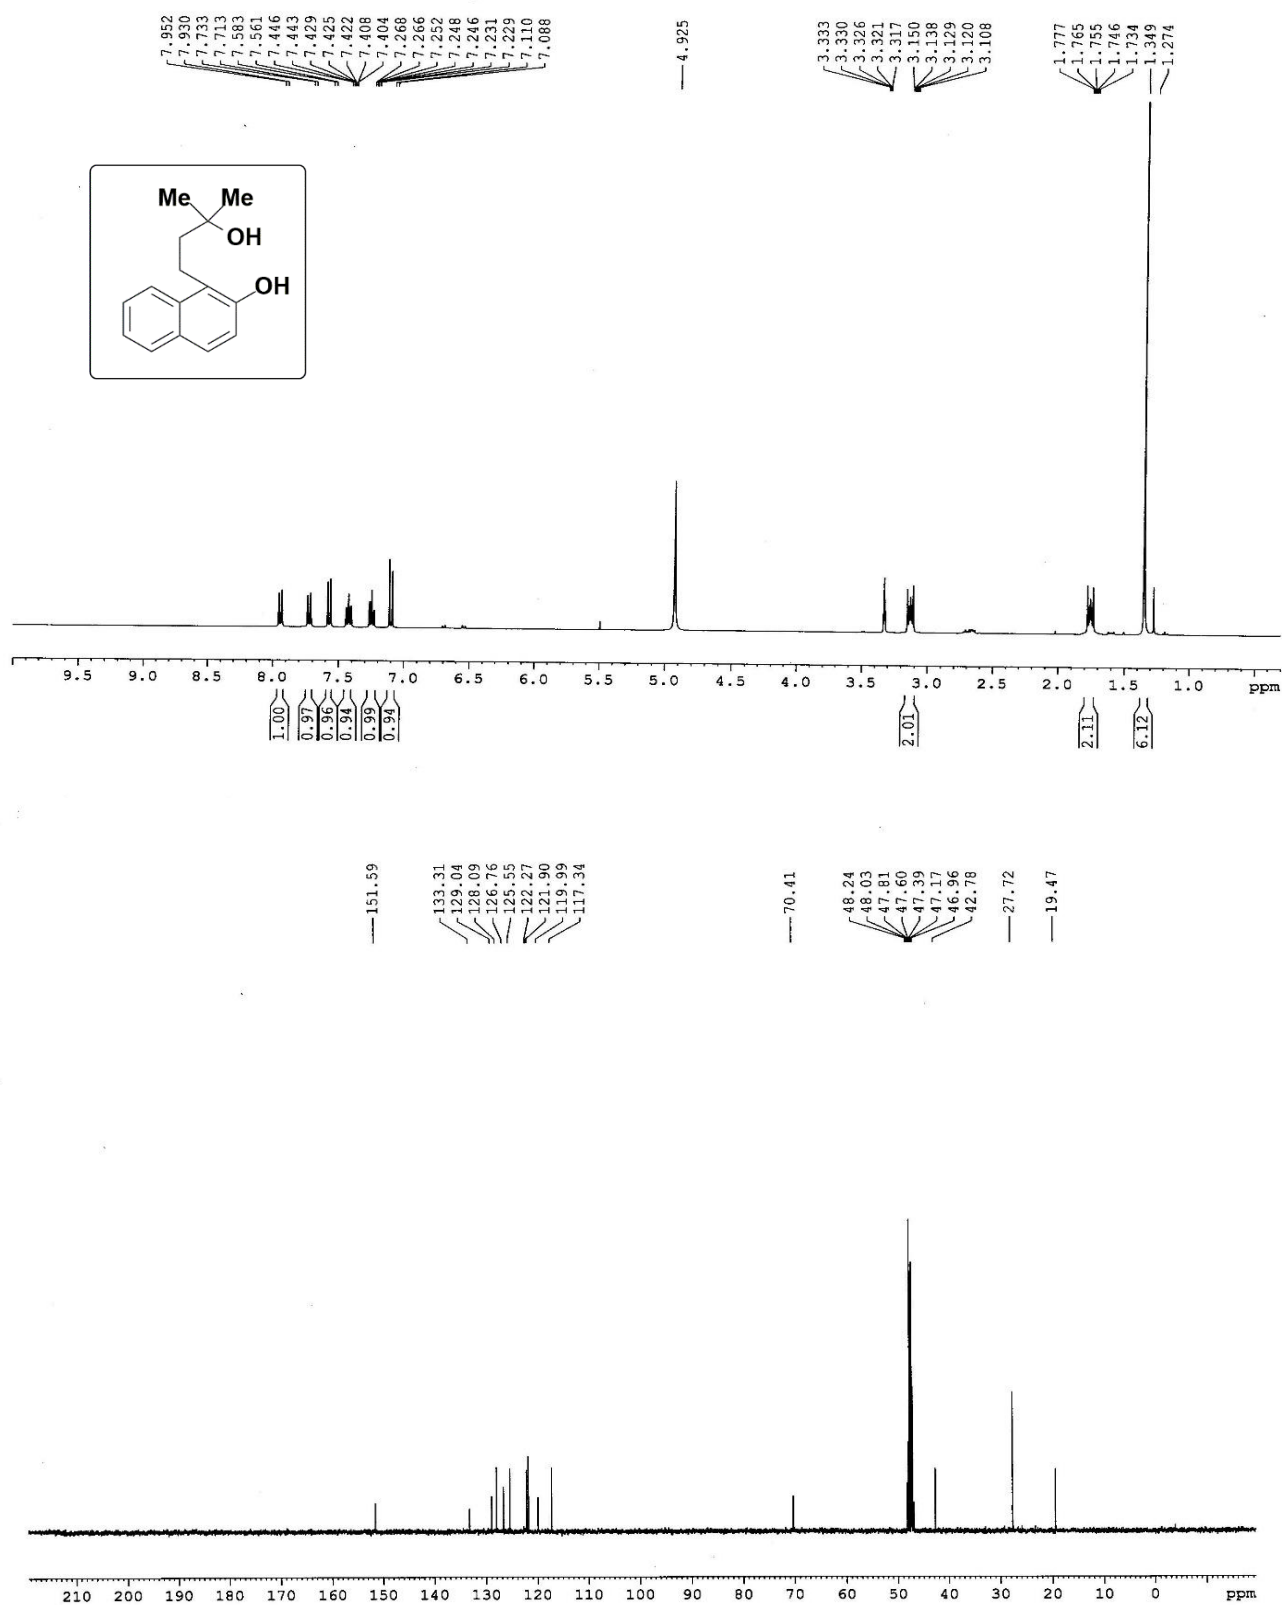

# 1-(3-hydroxy-(3-ethyl-3hydroxypentyl) naphthalene-2-ol (3c)

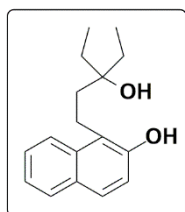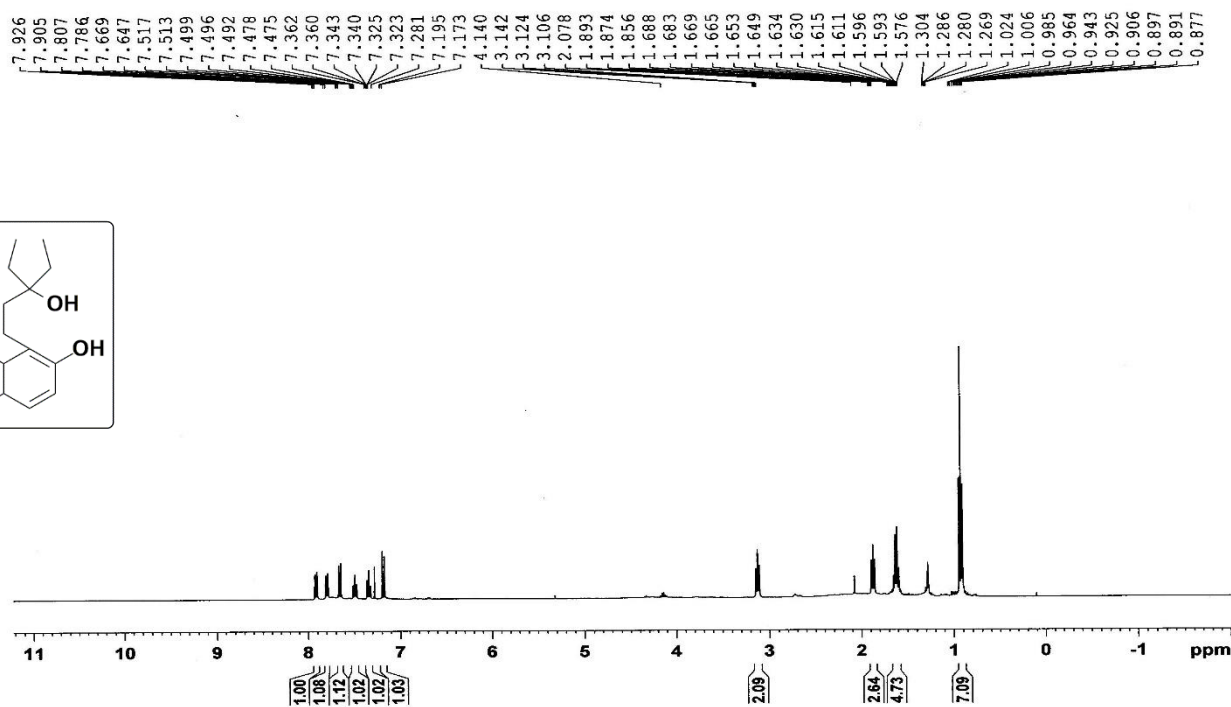

13C of DS-BE-EAL

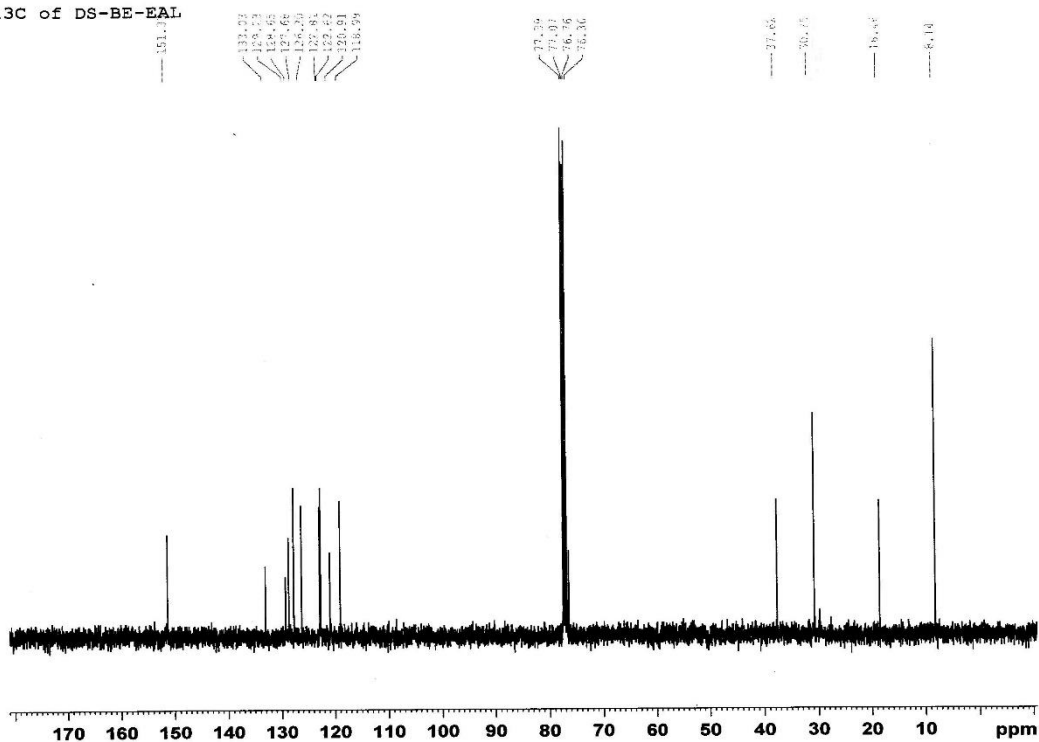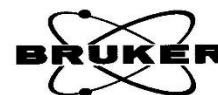

```

NAME      08.06.2015
EXPNO     26
PROCNO    1
Date_     20150730
Time      6.25
INSTRUM   spect
PROBHD    5 mm PABBO BB-
PULPROG   zgpg30
TD         32768
SOLVENT   CDCl3
NS         71
DS         4
SWH        24038.465 Hz
FIDRES     0.733596 Hz
AQ         0.6810244 sec
RG         203
DN         20.800 usec
DE         6.50 usec
TE         298.3 K
D1         2.00000000 sec
D11        0.03000000 sec
TD0        1

===== CHANNEL f1 =====
NUC1       13C
P1         9.00 usec
PL1        -1.00 dB
PL1W       42.37451935 W
SFO1       100.6278585 MHz

===== CHANNEL f2 =====
CPDPRG2    waltz16
NUC2       1H
PCPD2      80.00 usec
PL2        -1.00 dB
PL12       14.00 dB
PL13       14.00 dB
PL1W       9.4868322 W
PL12W      0.30000001 W
PL13W      0.30000001 W
SFO2       400.1514606 MHz
SI         16384
SF         100.6177980 MHz
MDM        EM
SSB        0
SB         1.00 Hz
GB         0
PC         1.40
    
```

**1-(3-benzyl-3-hydroxy-4-phenylbutyl) naphthalene-2-ol (3d)**

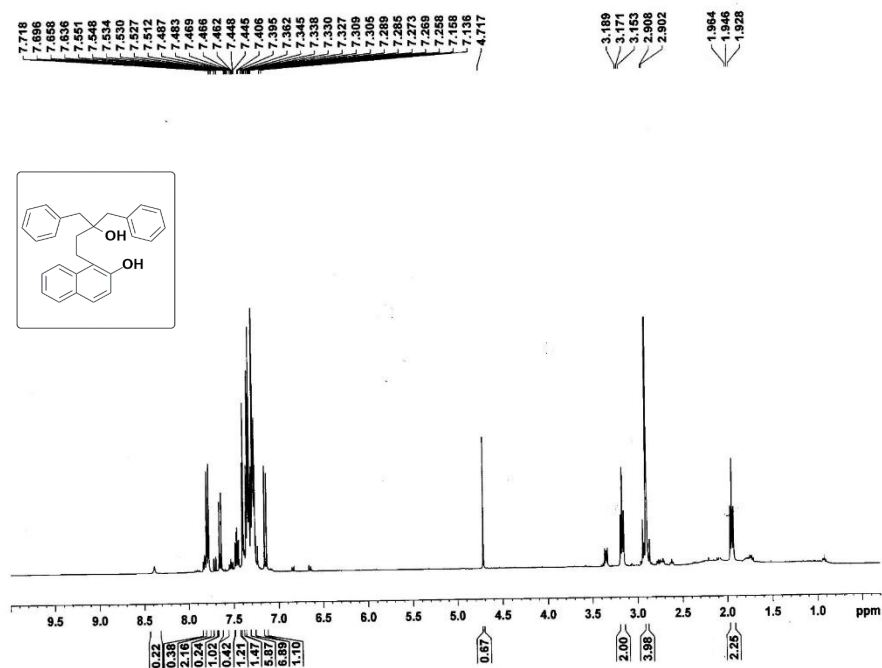

**1-(3-hydroxy-3,3-diphenylpropyl)naphthalen-2-ol (3e)**

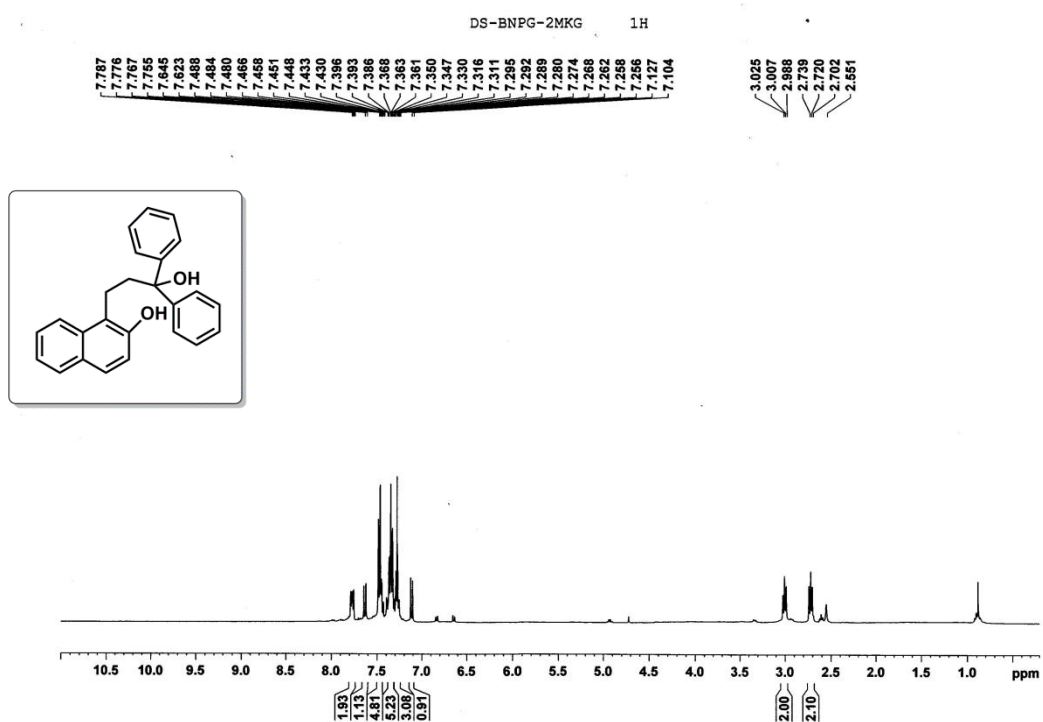



# 2-(3-hydroxypropyl) naphthalene-1-ol (3f)

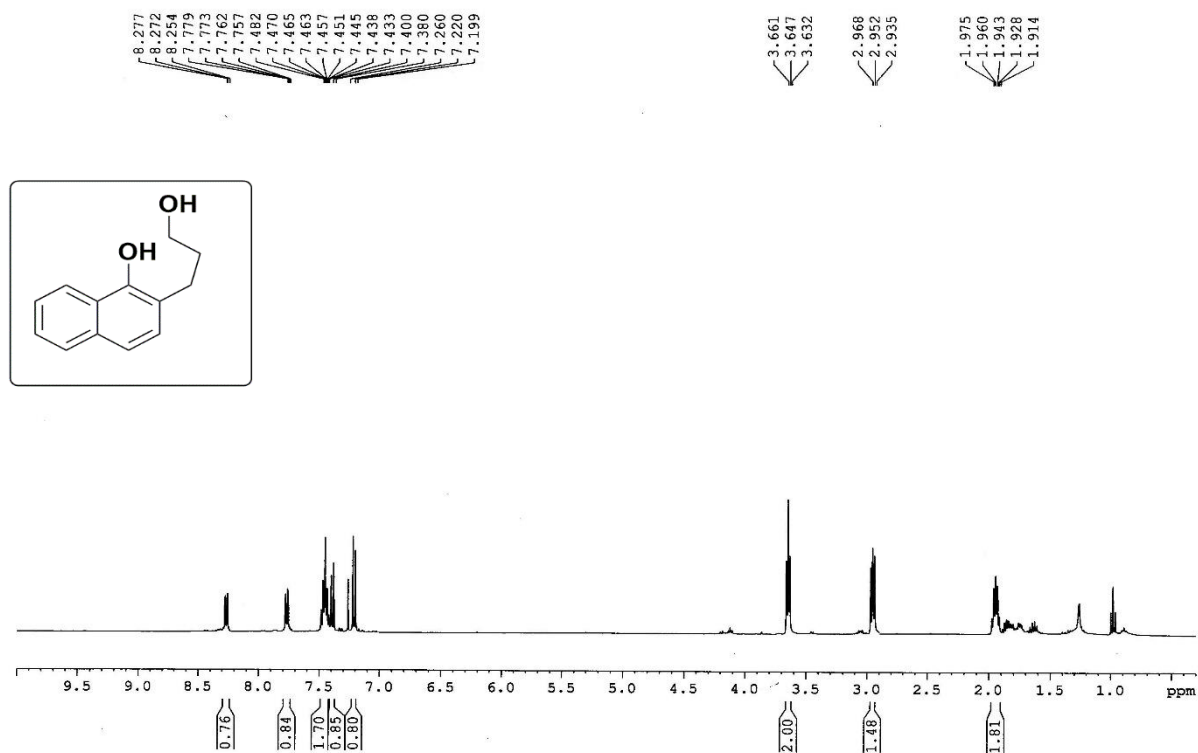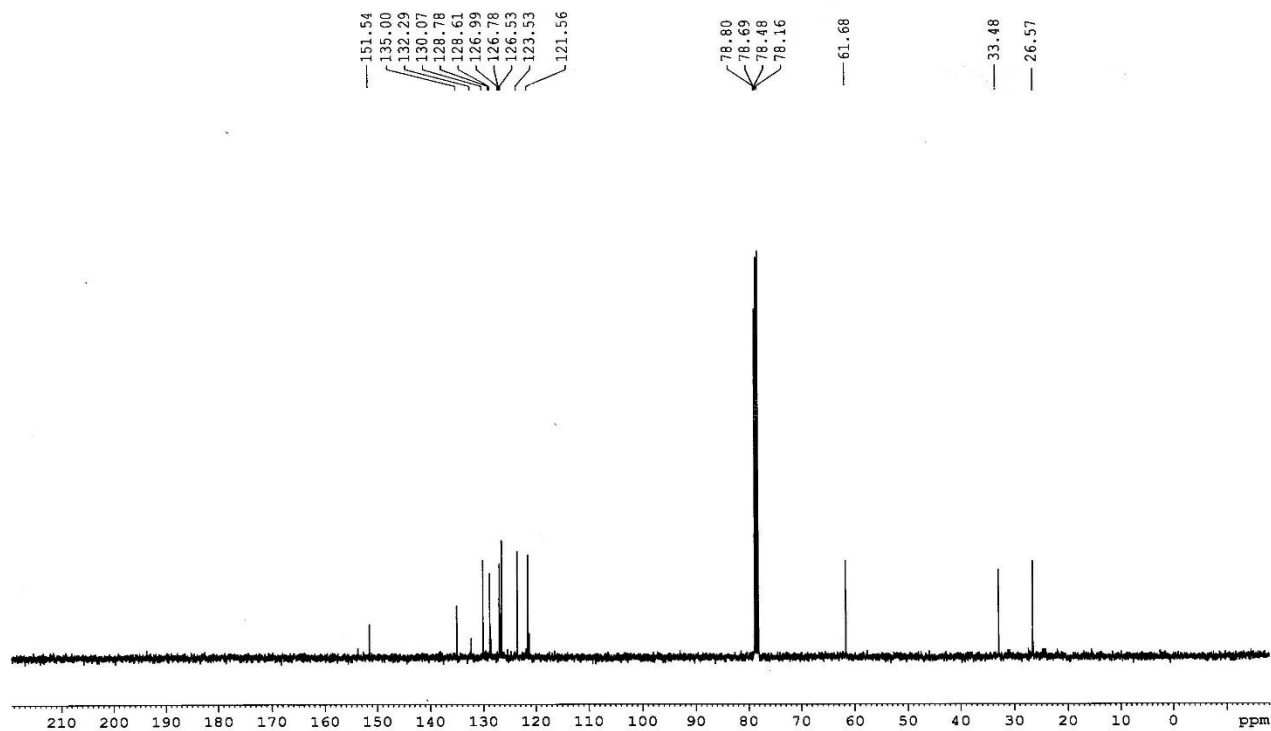

2-(3-hydroxy-3-methylbutyl) naphthalene-1-ol (3g)

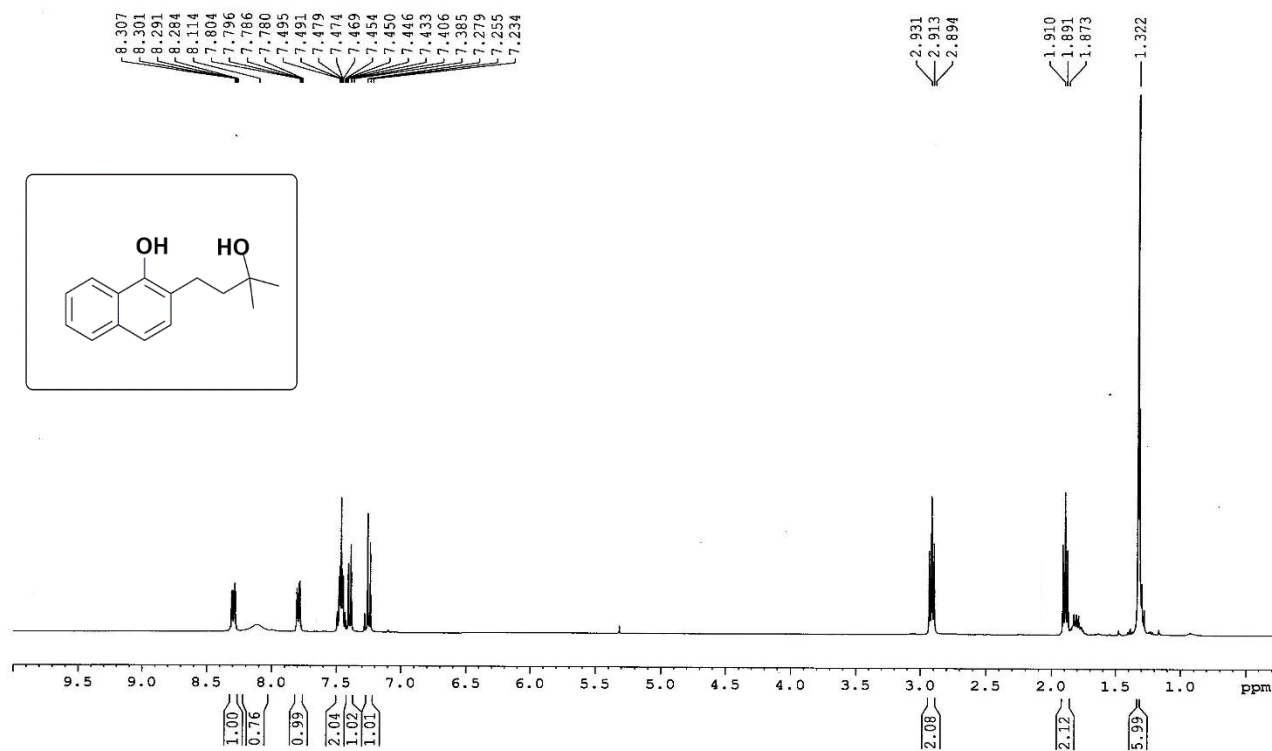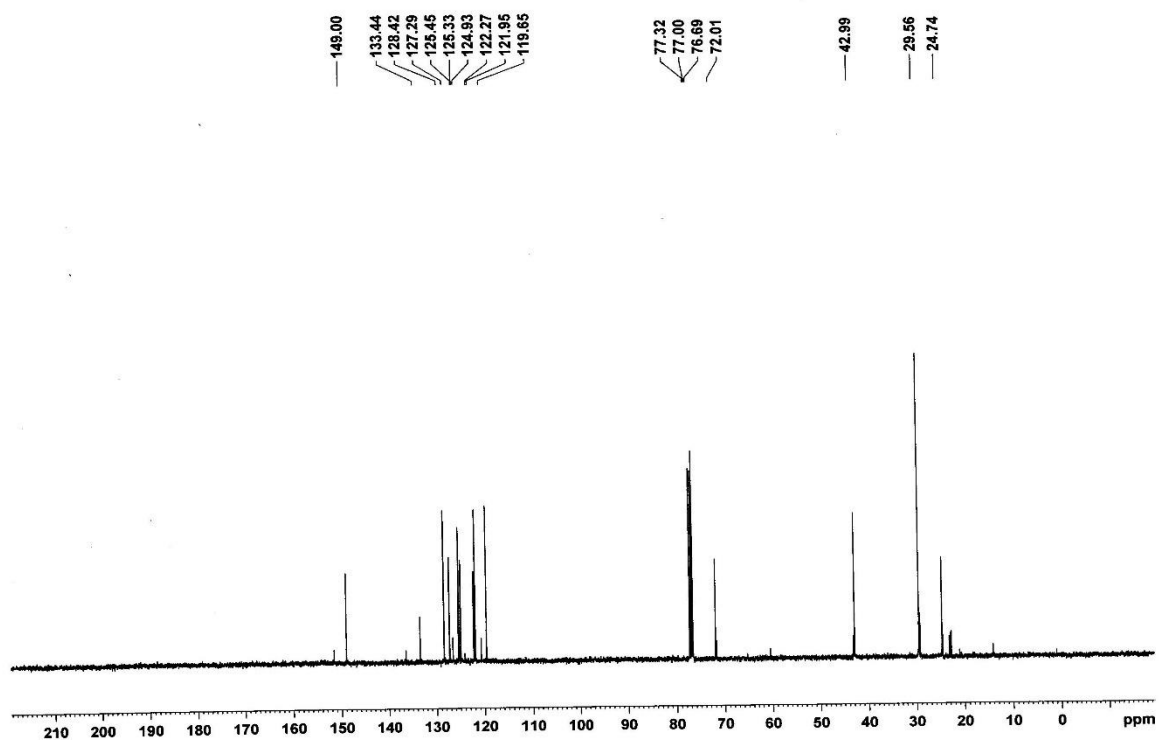

2,3-dihydro-1H-benzo(f)chromen-3-ol (1p)

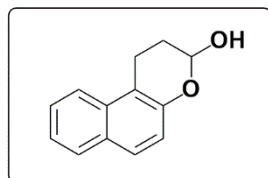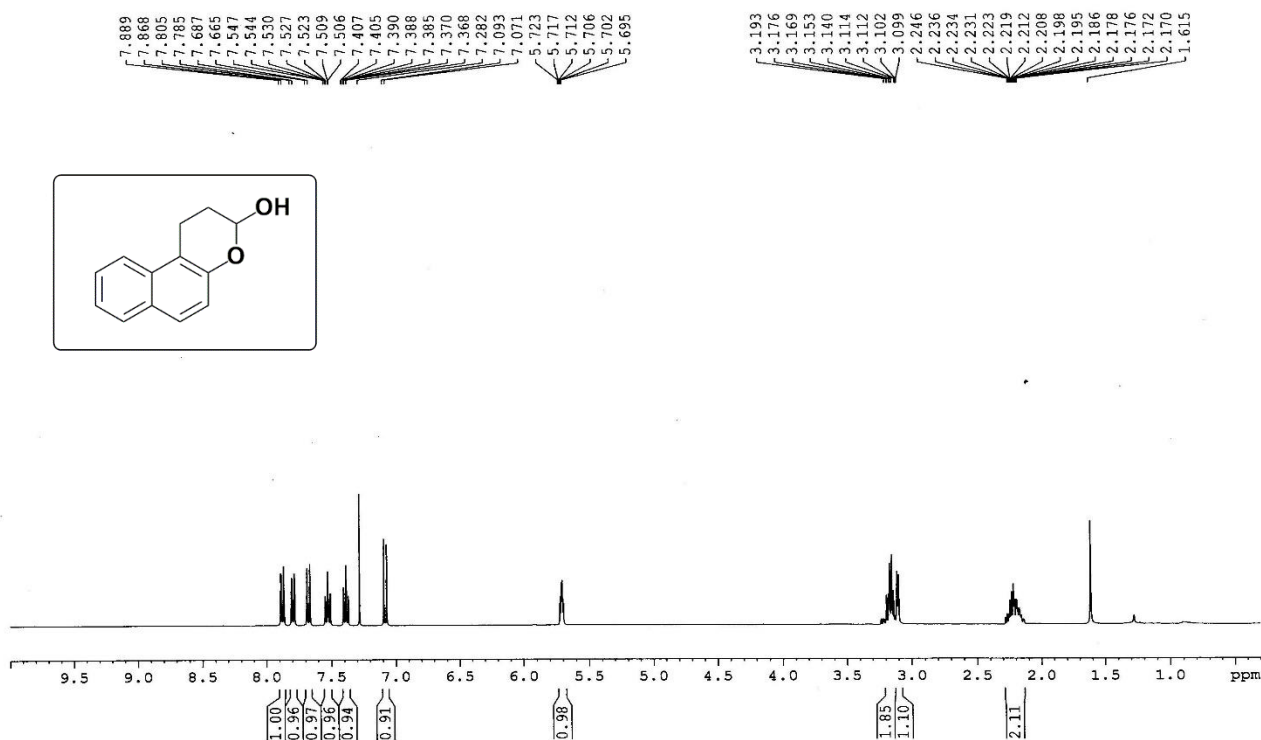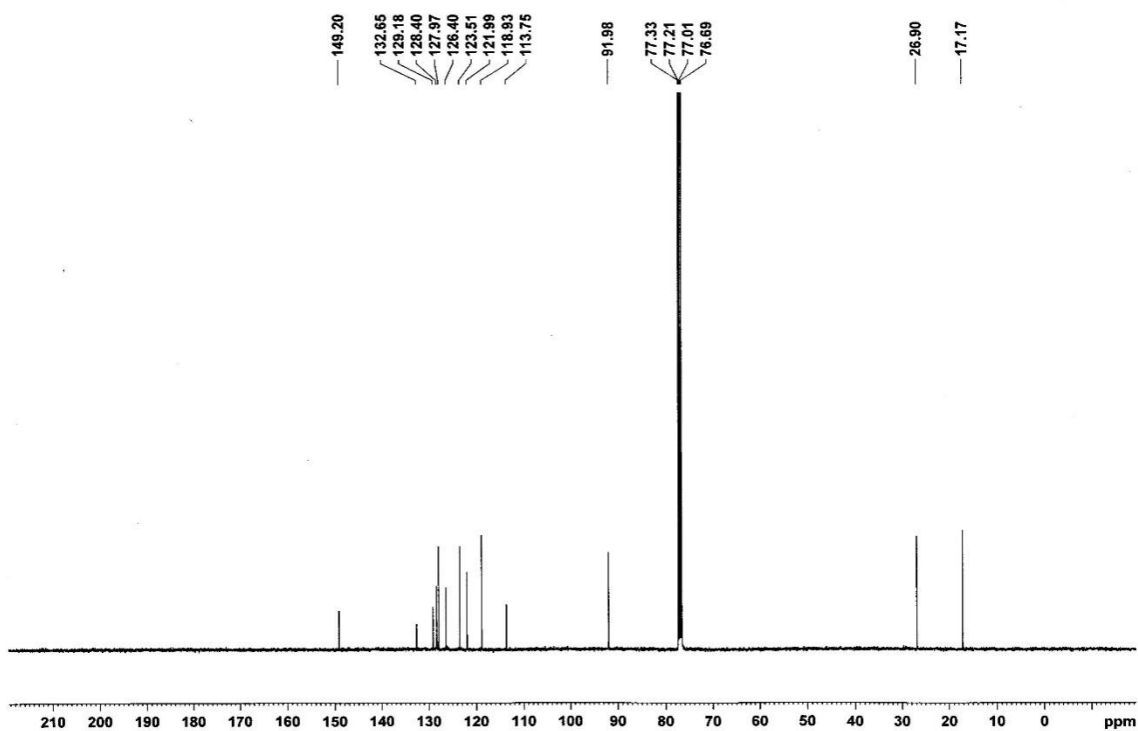

1-(3-hydroxybutyl) naphthalene-2-ol (5a)

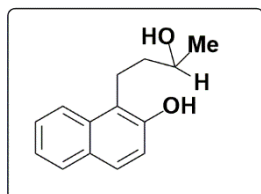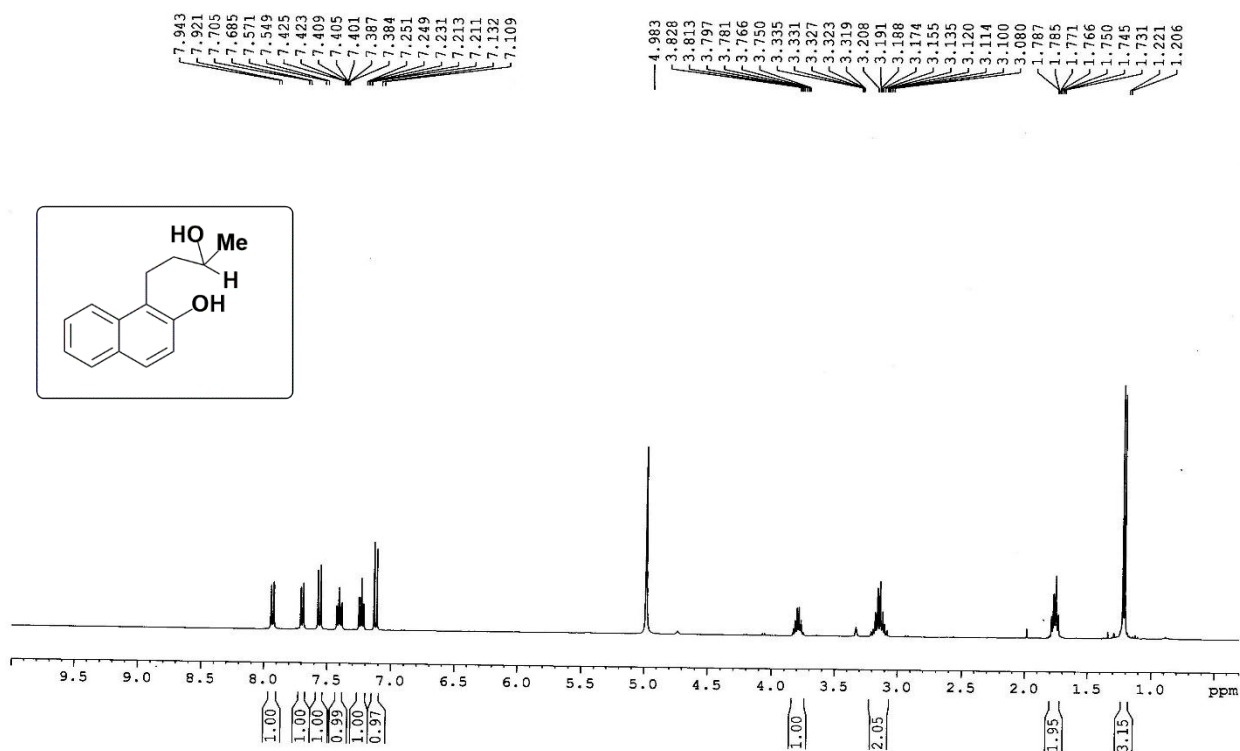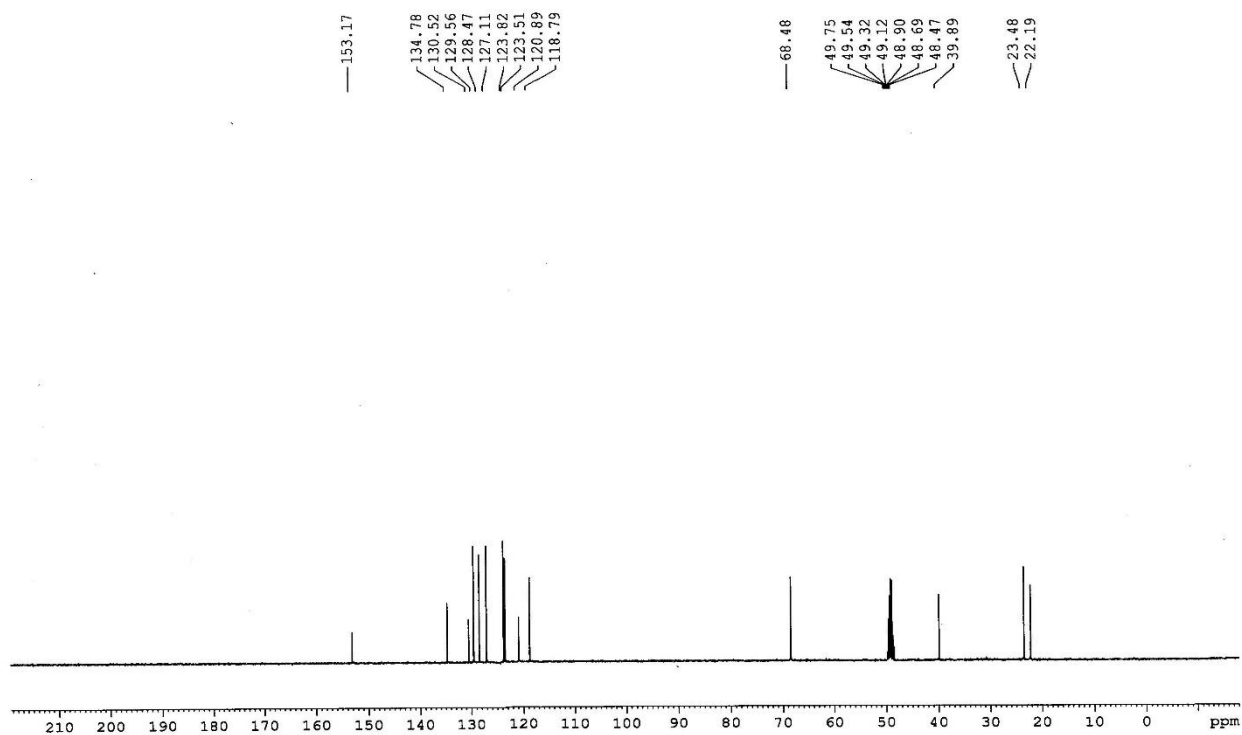

1-(3-hydroxypentyl) naphthalene-2-ol (5b)

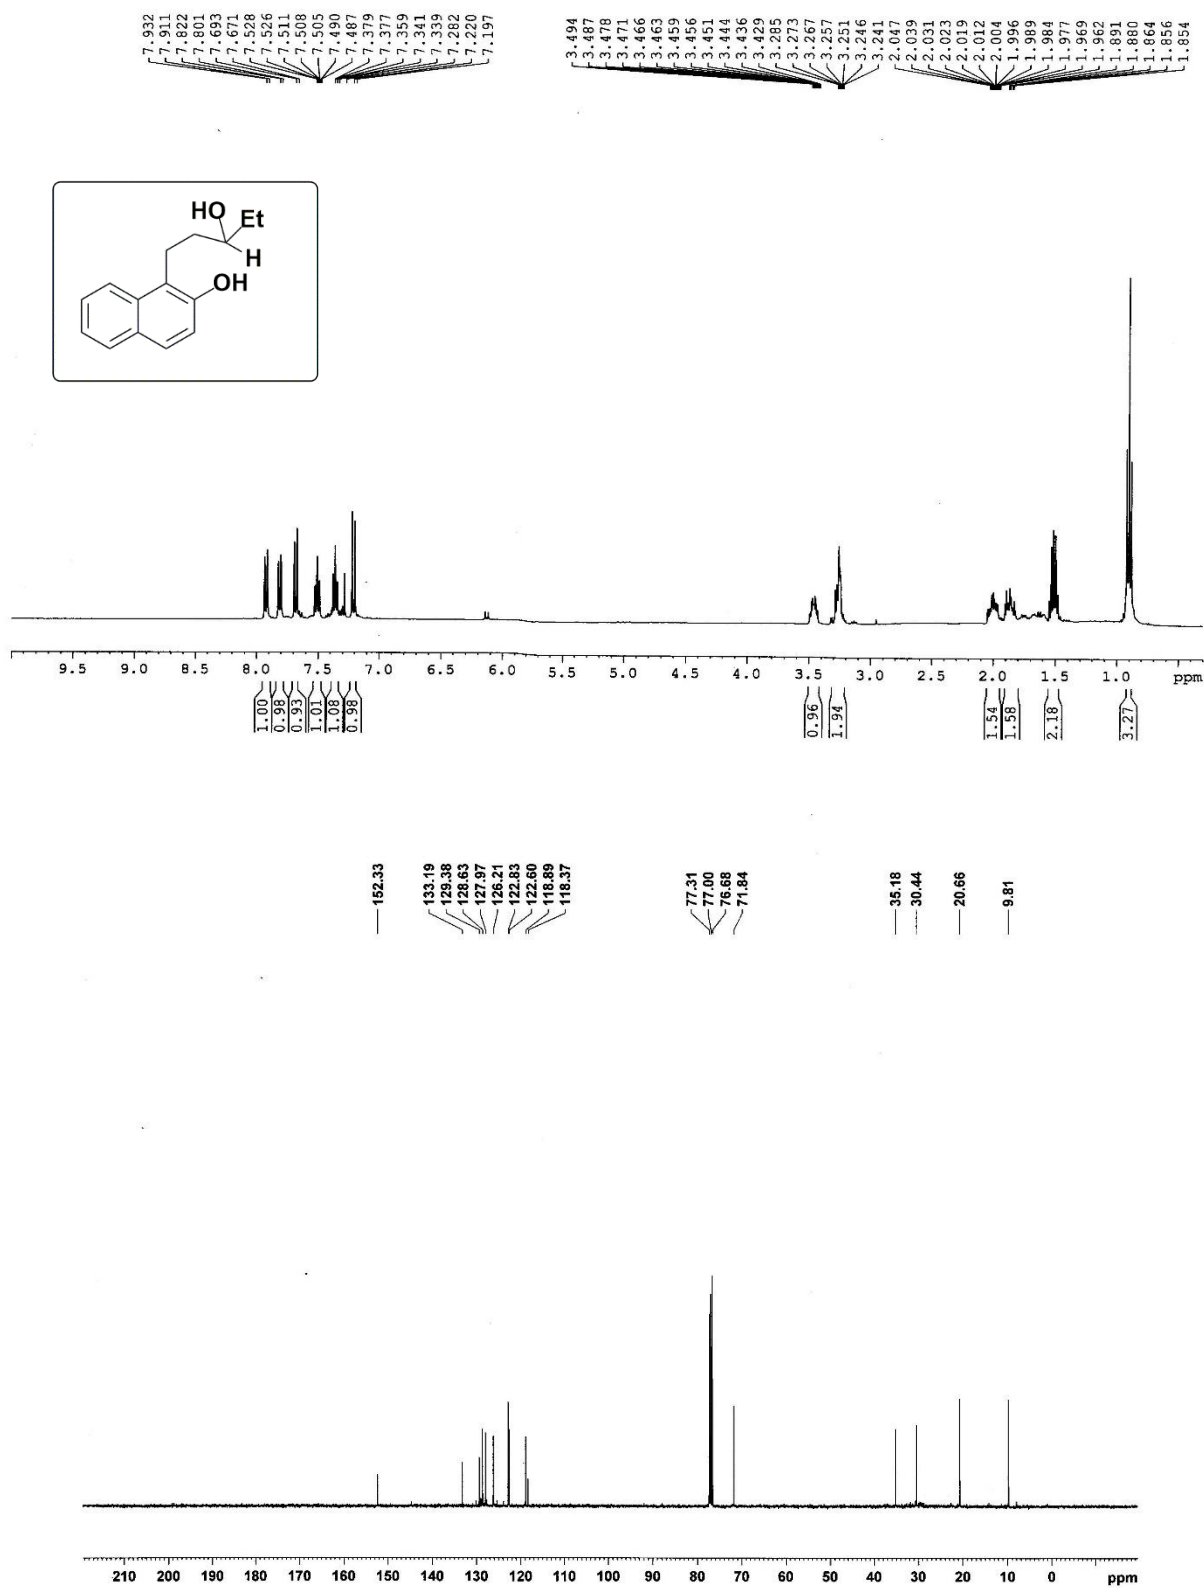

1-(3-hydroxy-4-phenylbutyl)naphthalene-2-ol (5c)

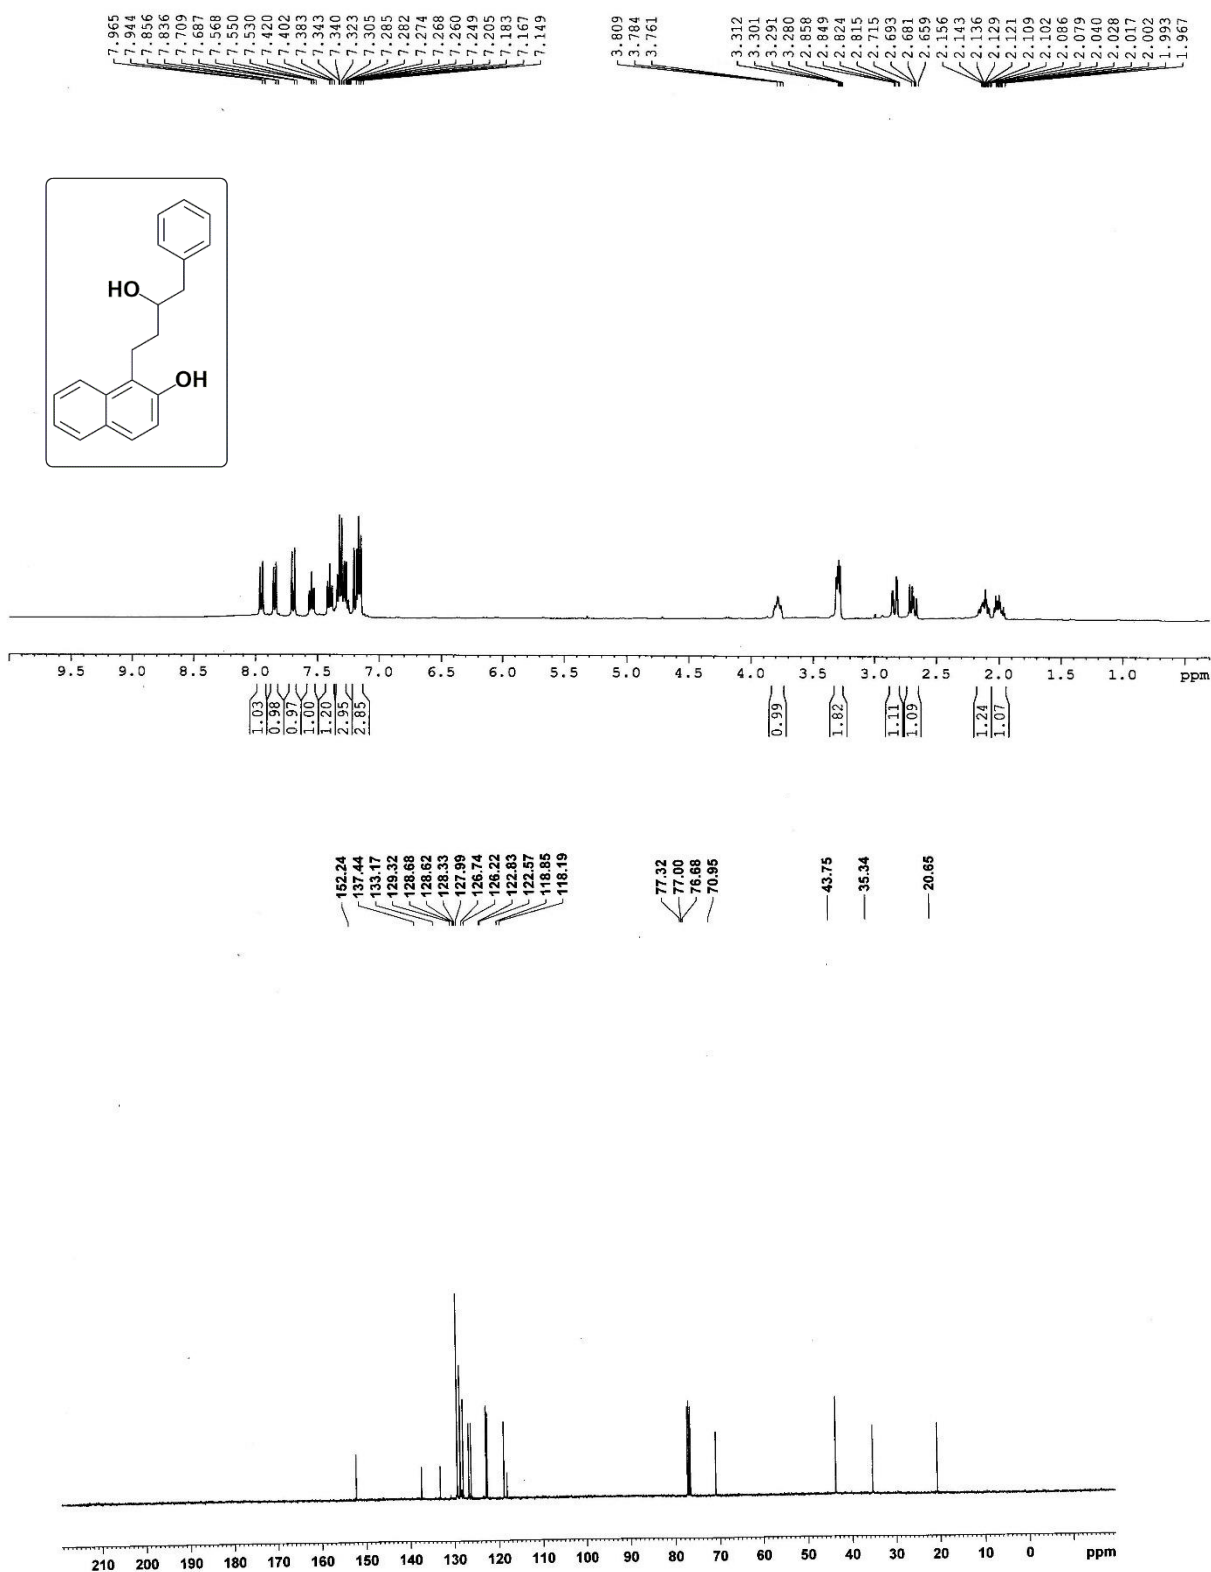

1-(3-hydroxy-3-phenylpropyl) naphthalene-2-ol (5d)

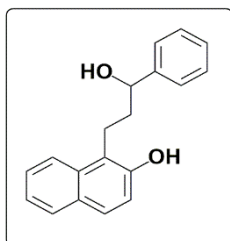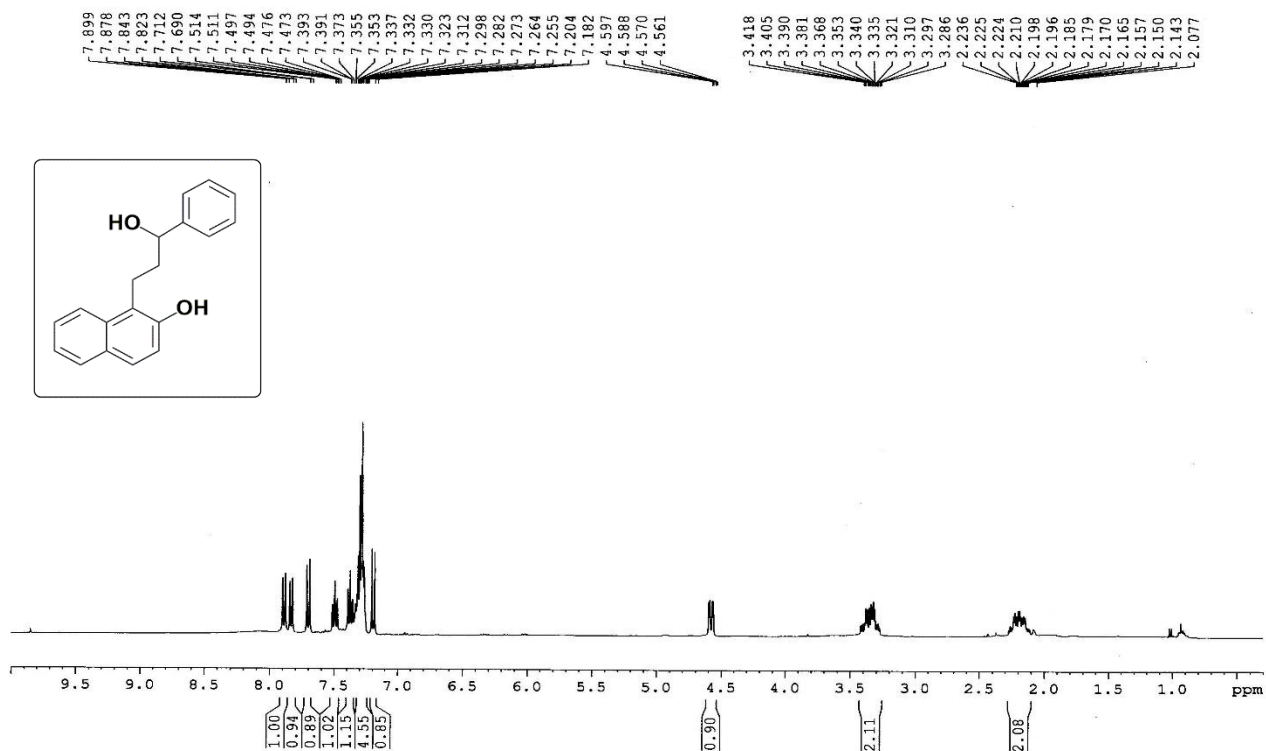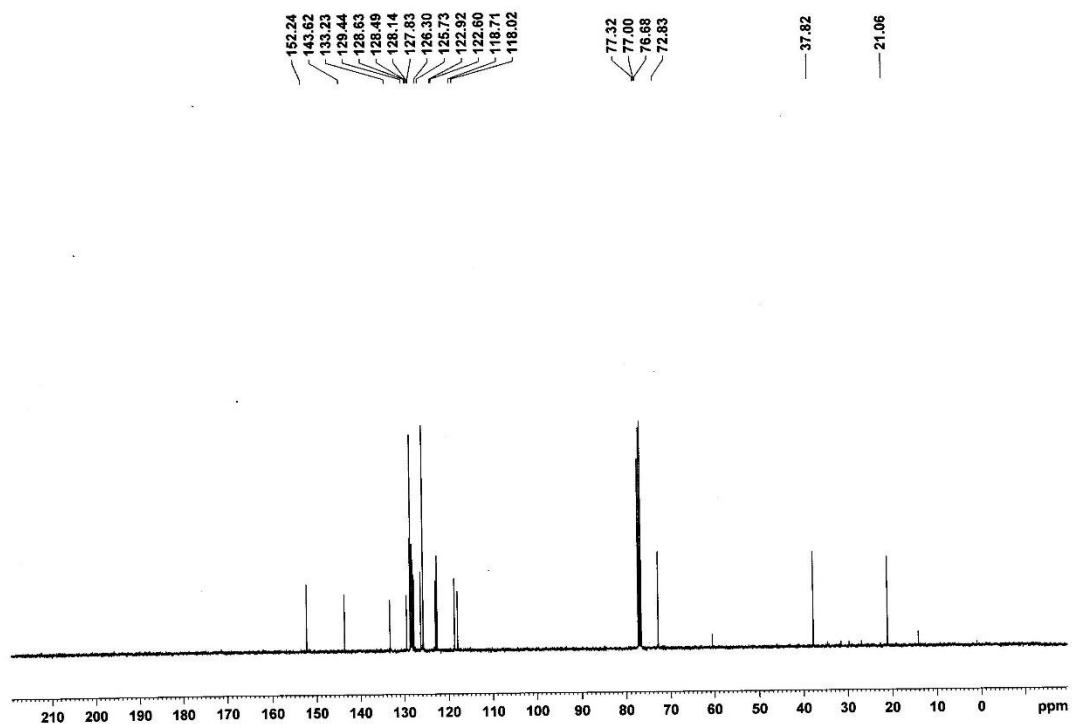

# 4-(allyloxy)-3-methylbenzaldehyde (iii)

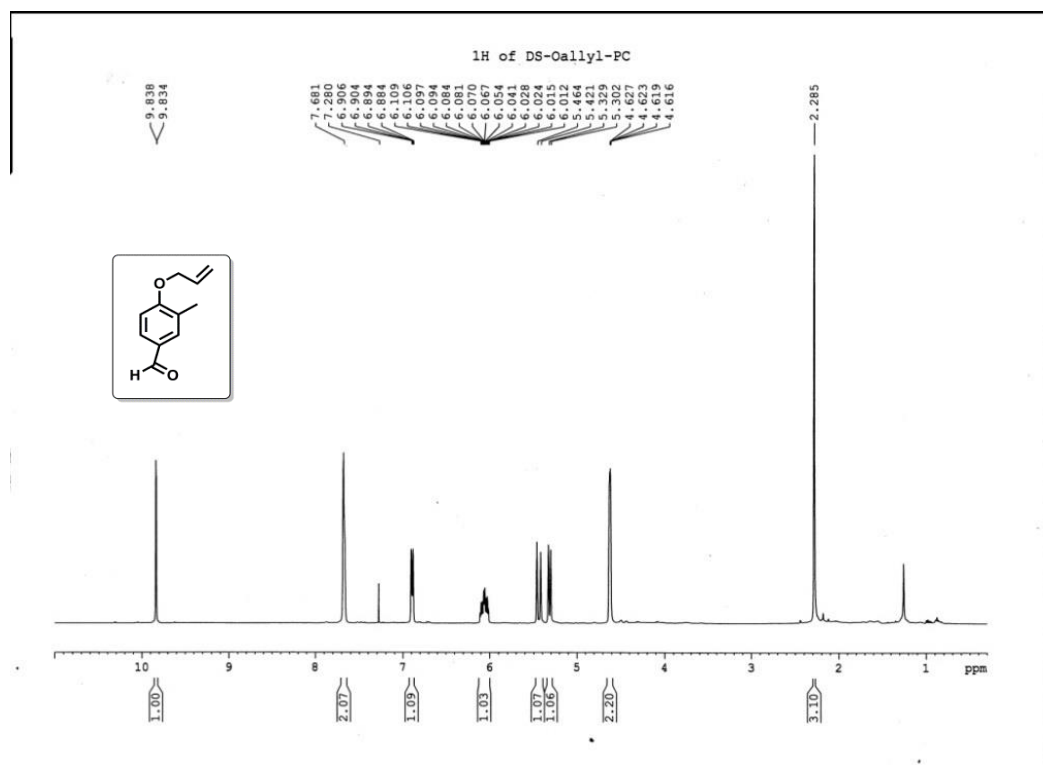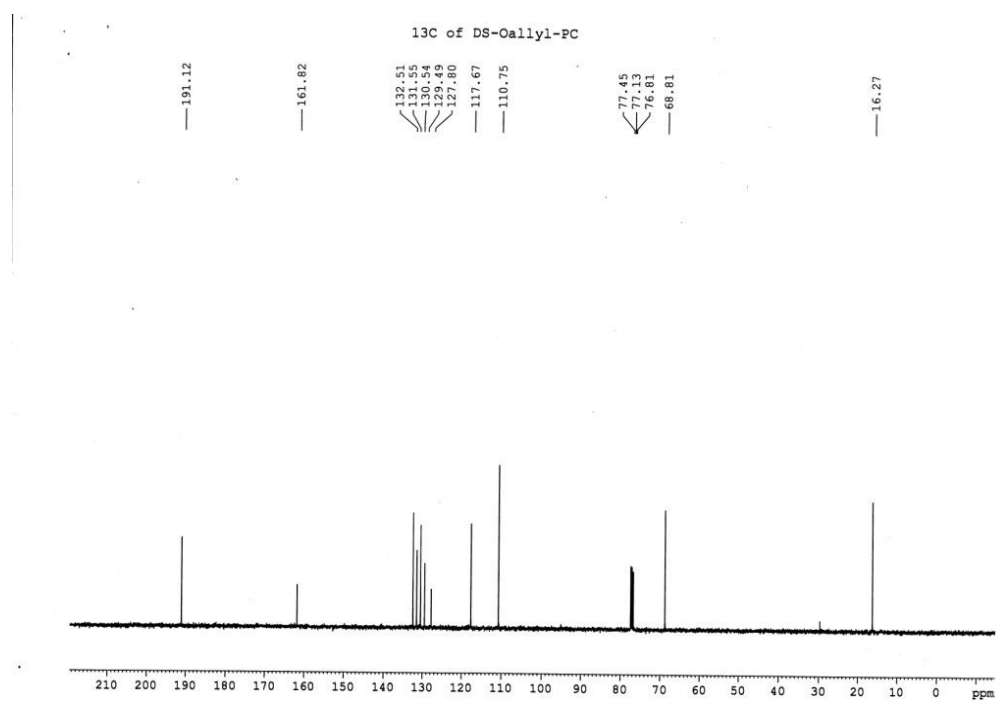



### 3-allyl-4-hydroxy-5-methylbenzaldehyde (iv)

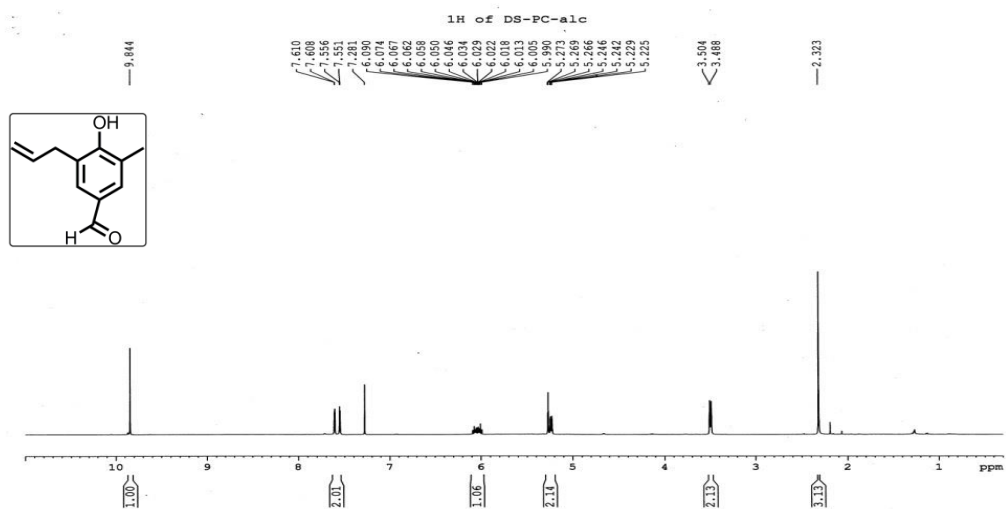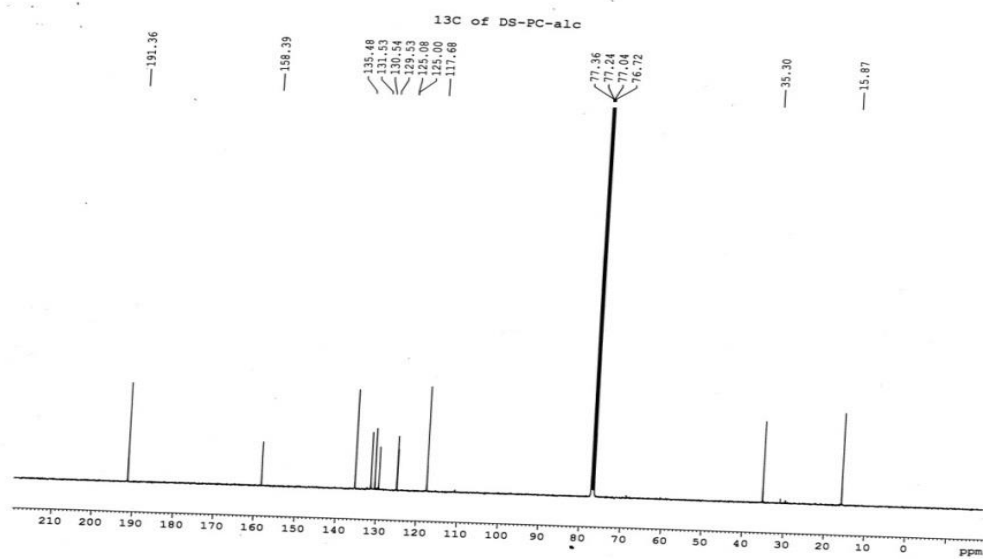

**(E)-ethyl 3-(4-hydroxy-3-methyl-5-propylphenyl)acrylate (vi)**

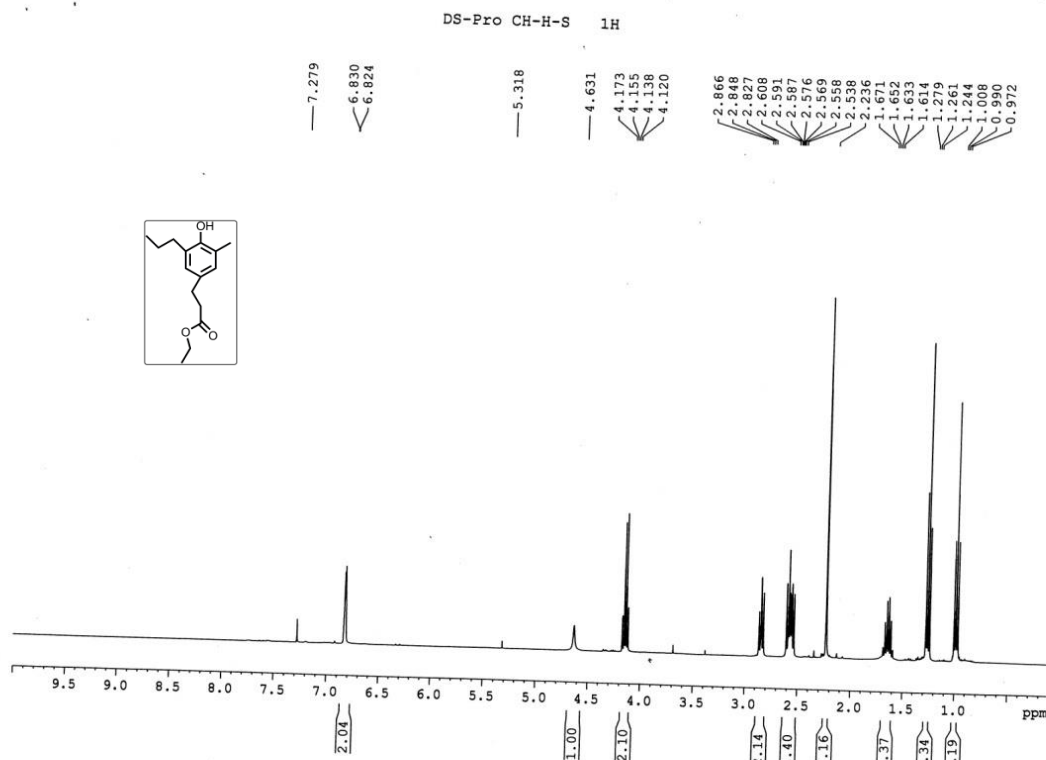

**4-(3-hydroxybutyl)-2-methoxyphenol (13a)**

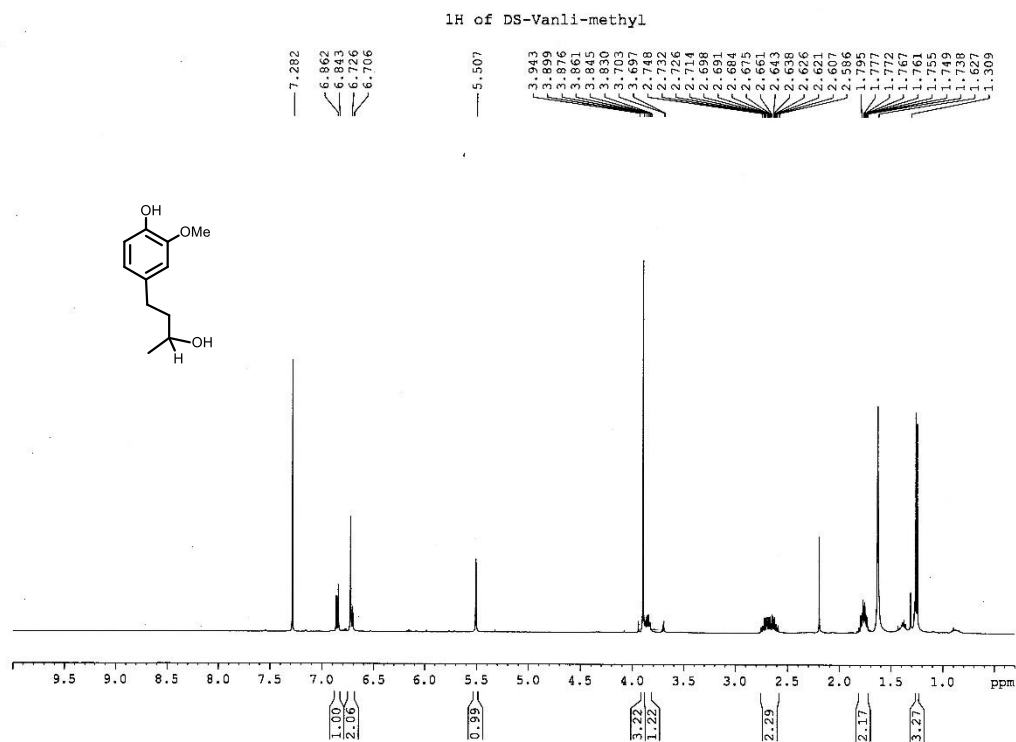

4-(3-hydroxy-3-methylbutyl)-2-methyl-6-propylphenol (8a)

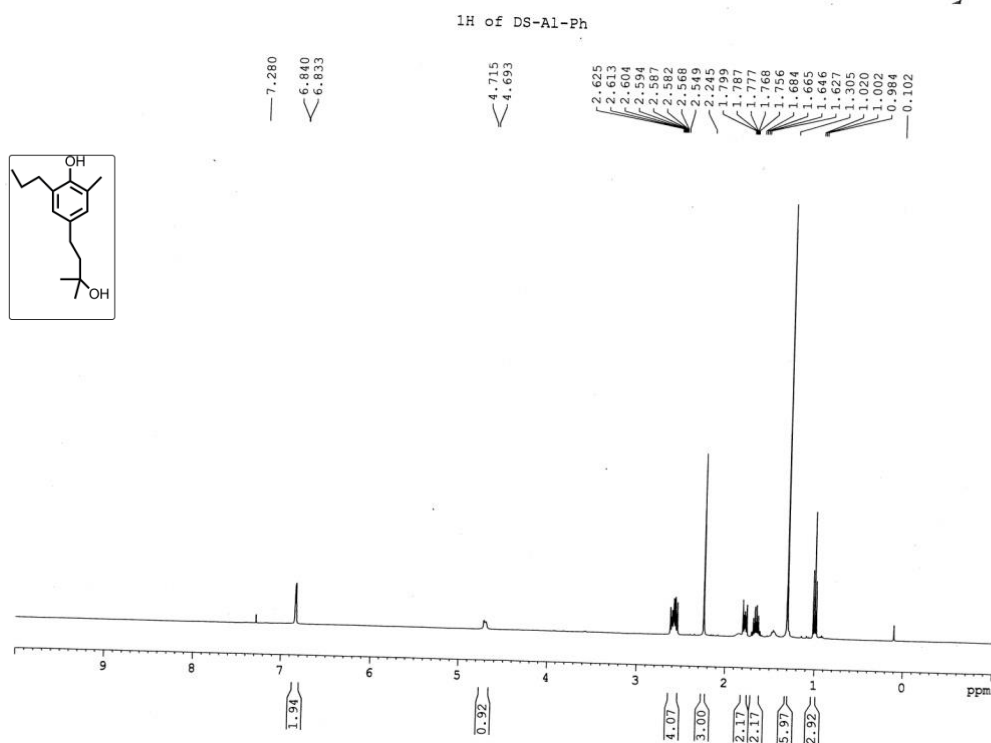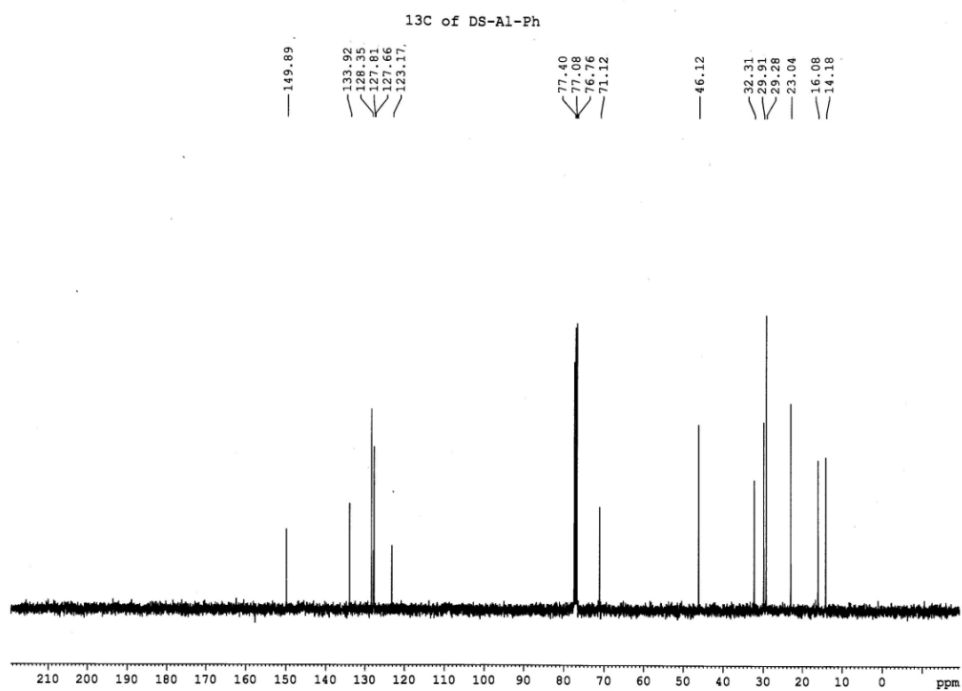

# 4-(3-hydroxypropyl)-2-methyl-6-propylphenol (8b)

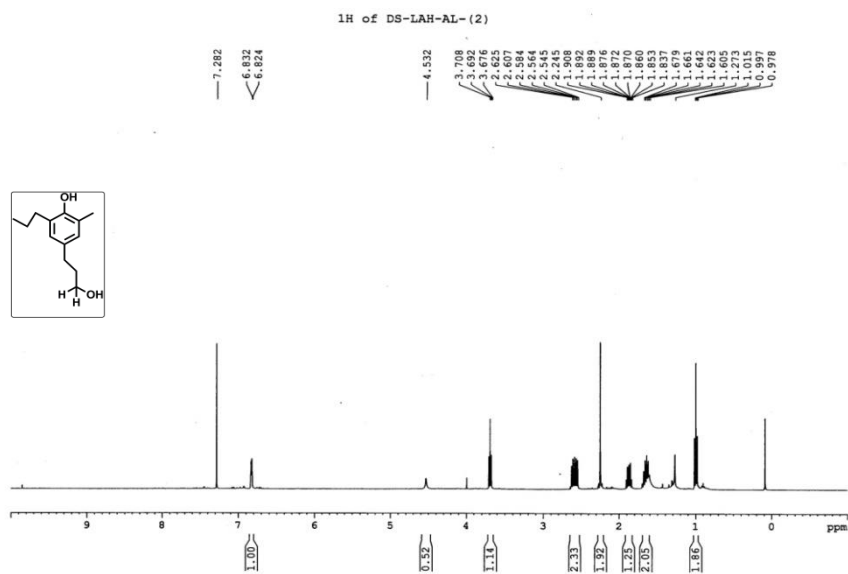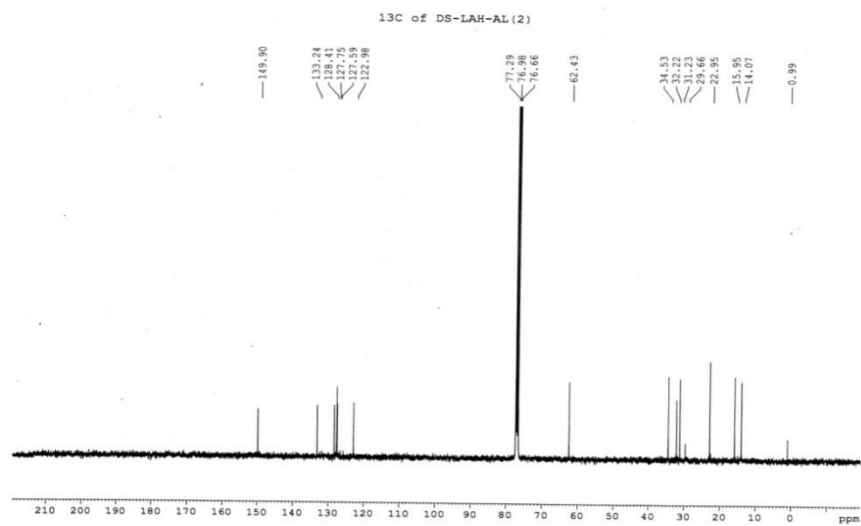

(E)-ethyl 3-(4-hydroxy-3,5-dimethylphenyl)acrylate (ix)

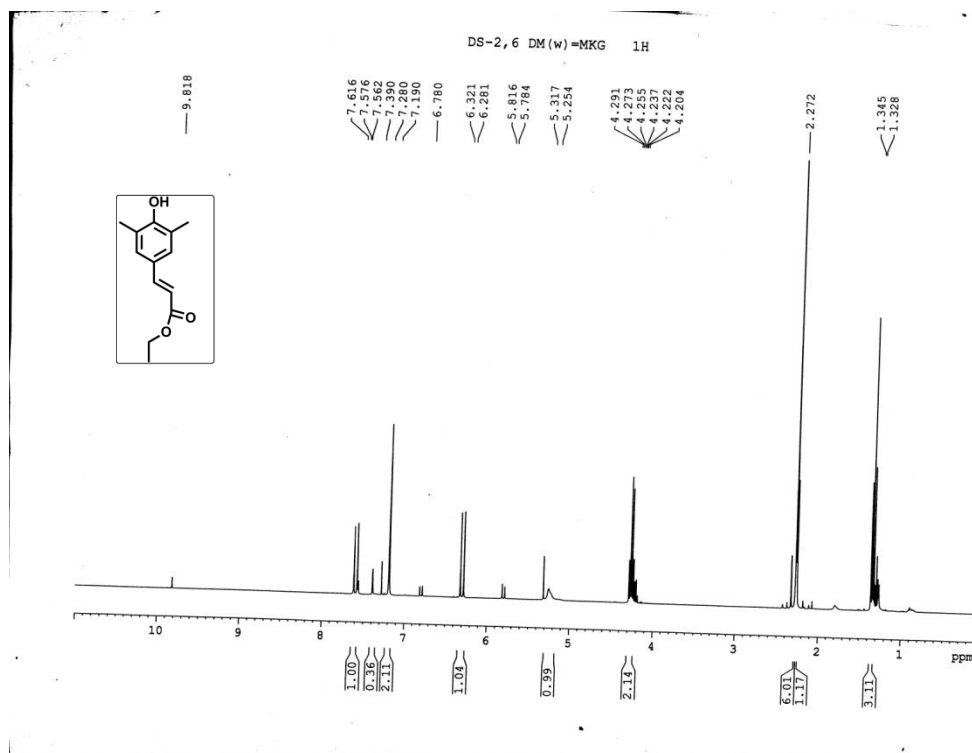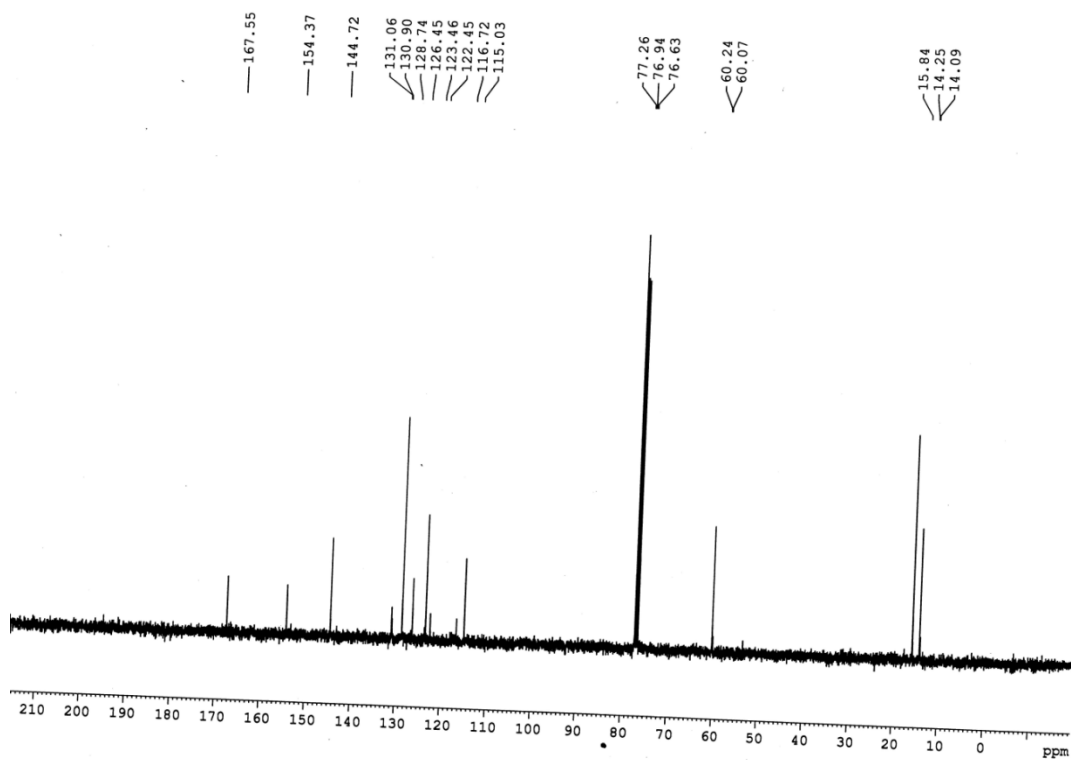

# Ethyl 3-(4-hydroxy-3,5-dimethylphenyl)propanoate (x)

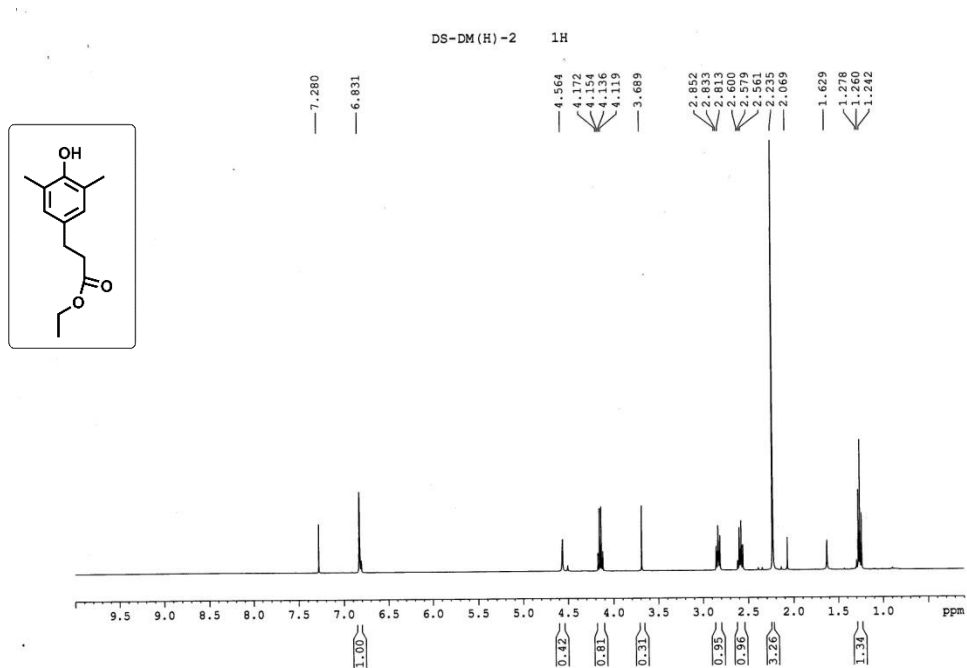

4-(3-hydroxypropyl)-2, 6-dimethylphenol 8(d)

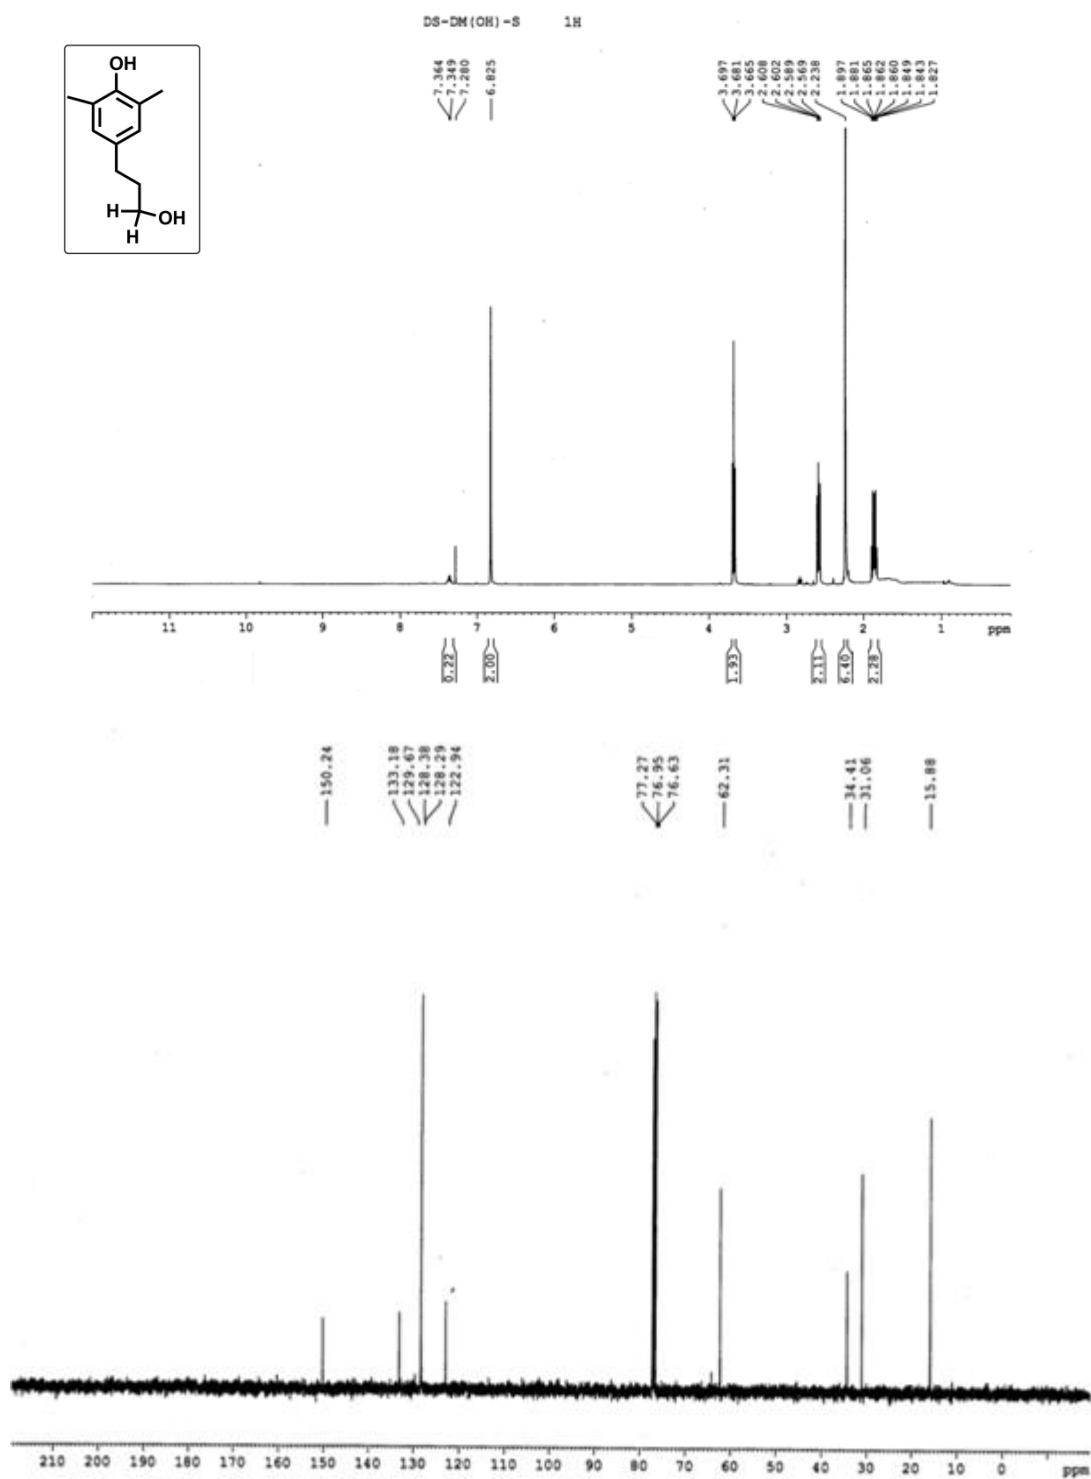

4-(3-hydroxy-3,3-diphenylpropyl)-2,6-dimethylphenol (8f)

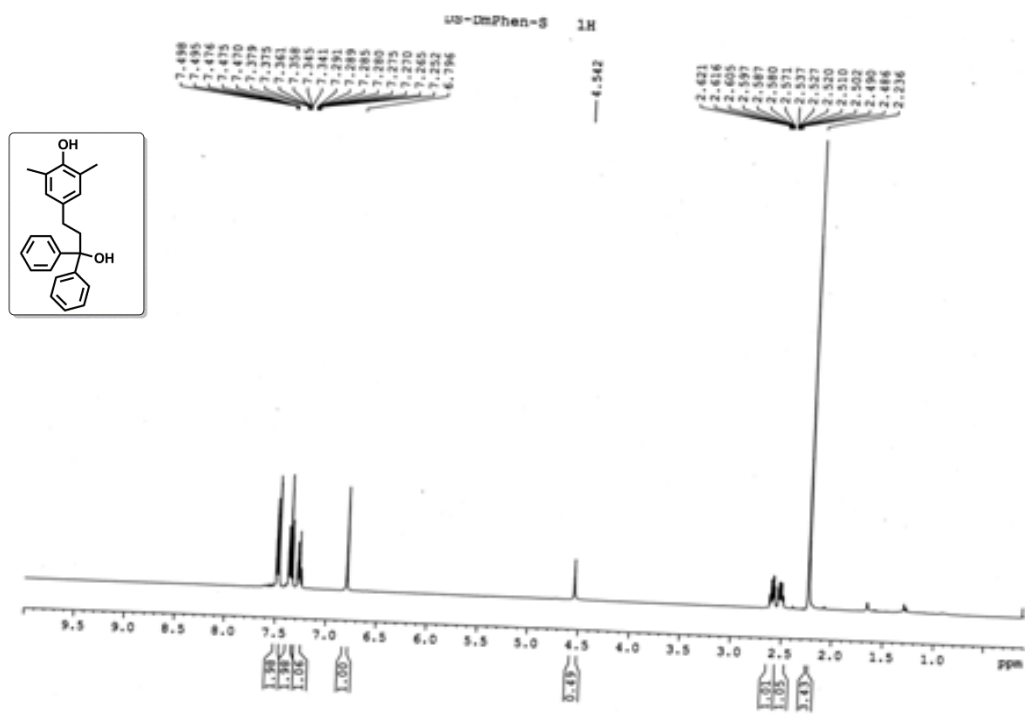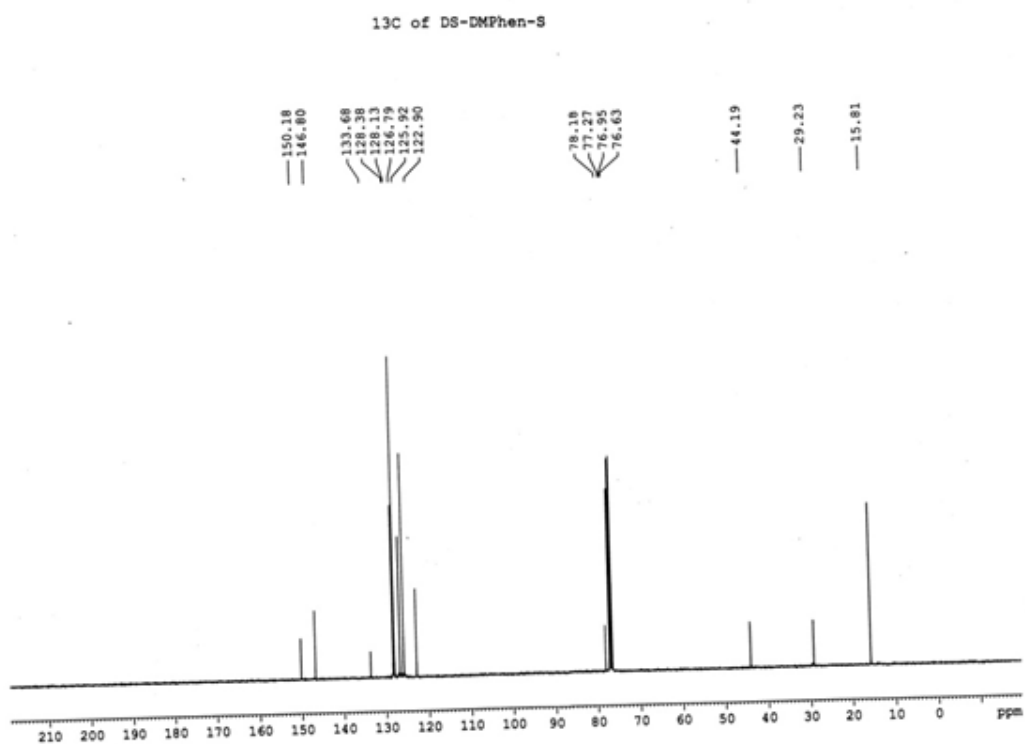



# 4-(3-hydroxy-3-methylbutyl)-2-methoxyphenol (10a)

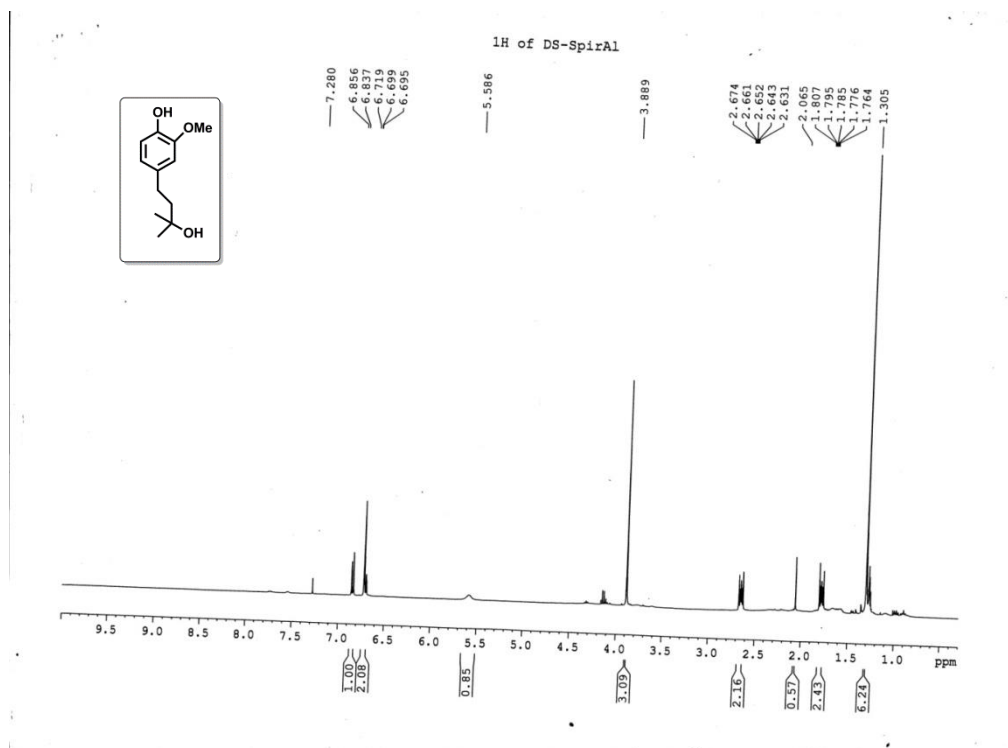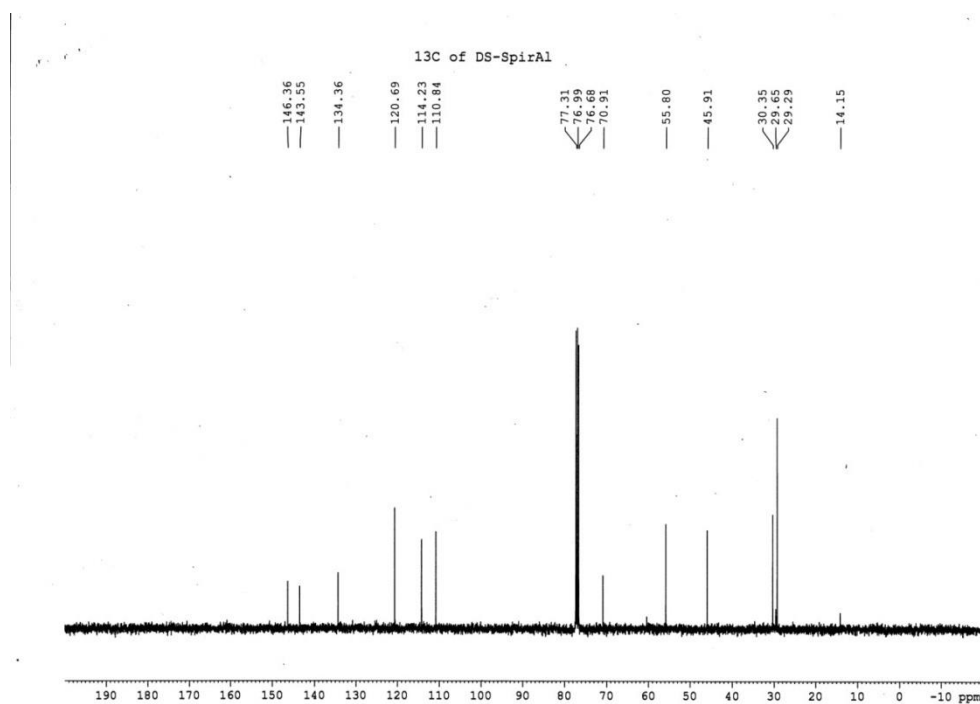

# 4-(3-hydroxy-3,3-diphenylpropyl)-2-methoxyphenol (10b)

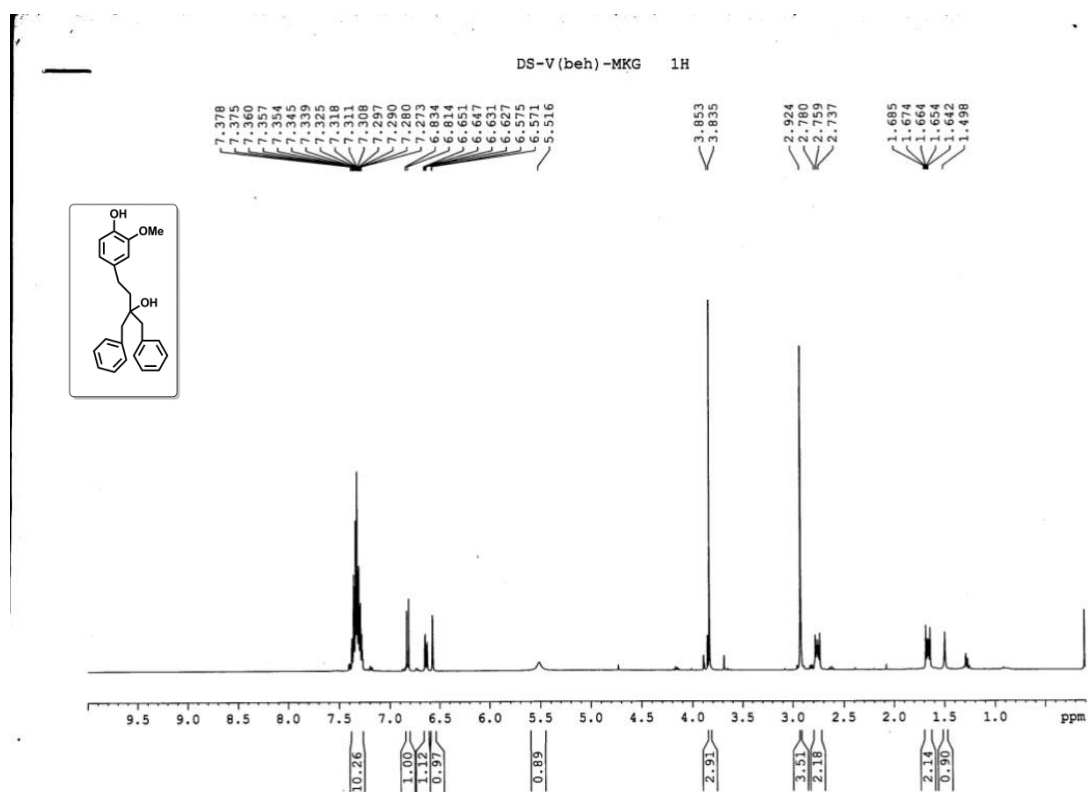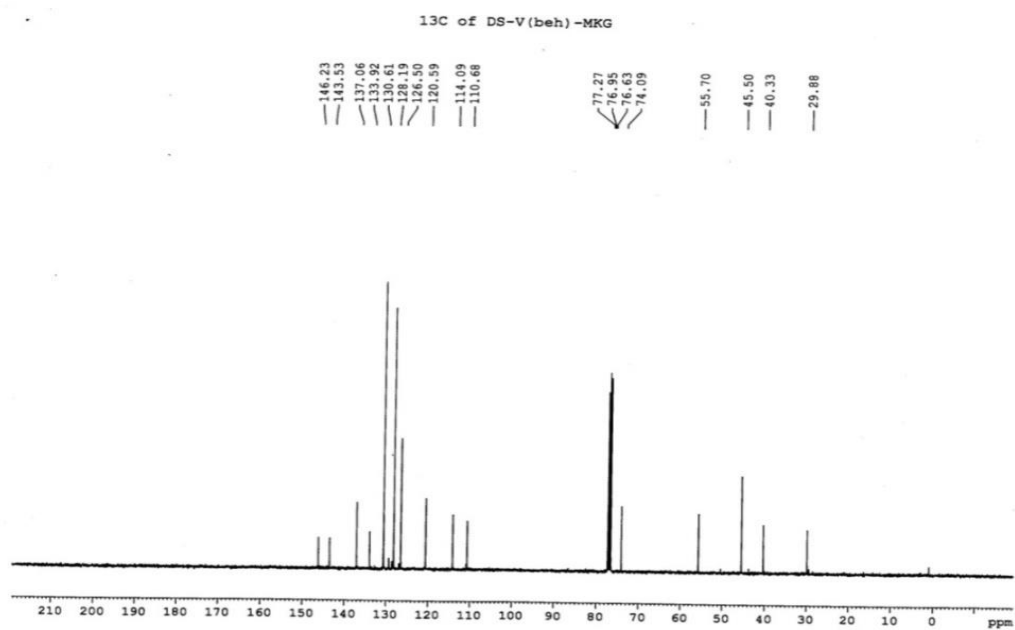

# 4-(3-hydroxy-3-phenylpropyl)-2-methoxyphenol (13b)

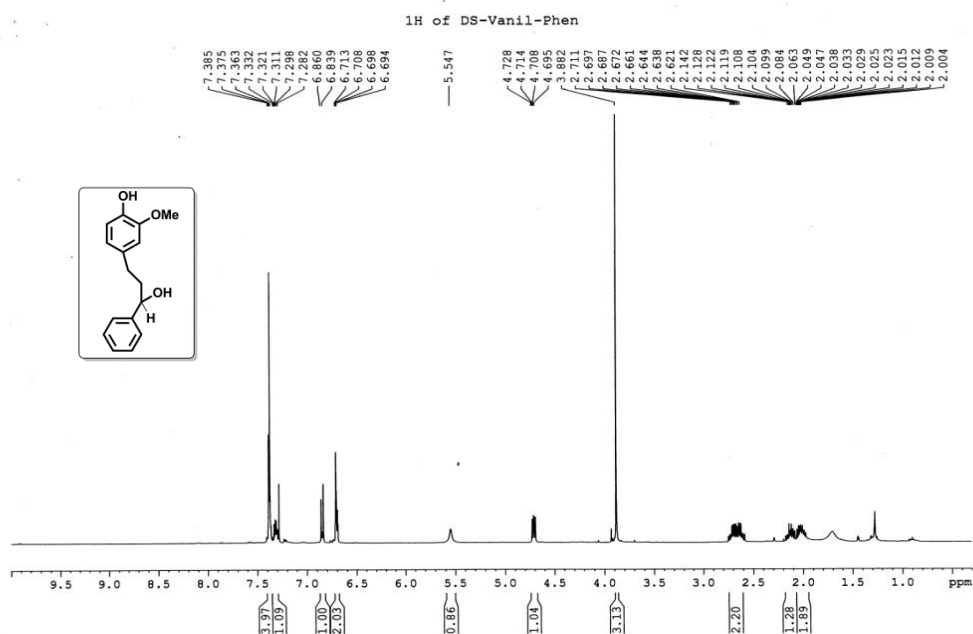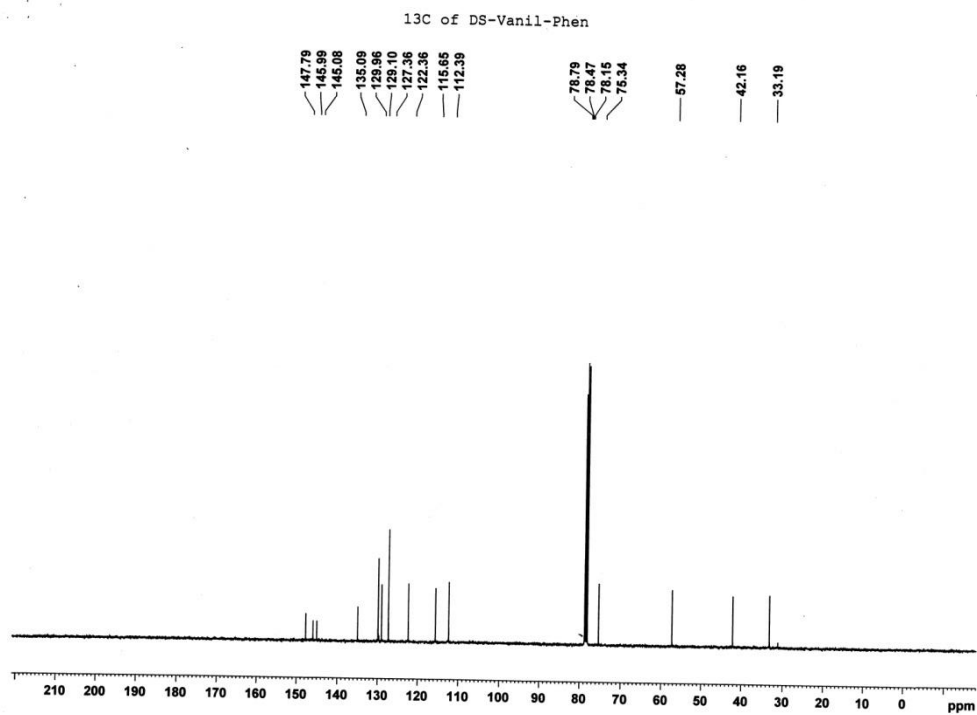

4-(3-hydroxy-4-phenylbutyl)-2-methoxyphenol 13(c)

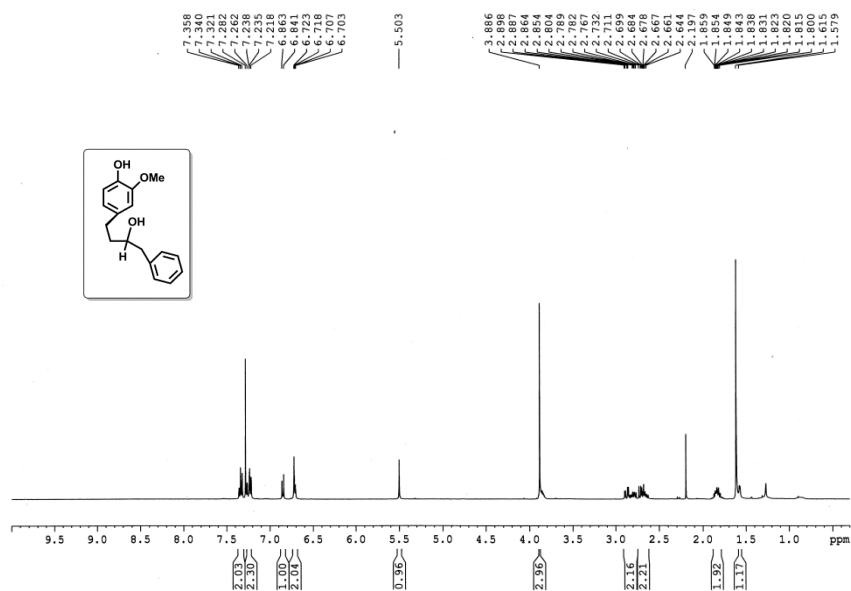

<sup>13</sup>C of DS-VANIL-BENZYL

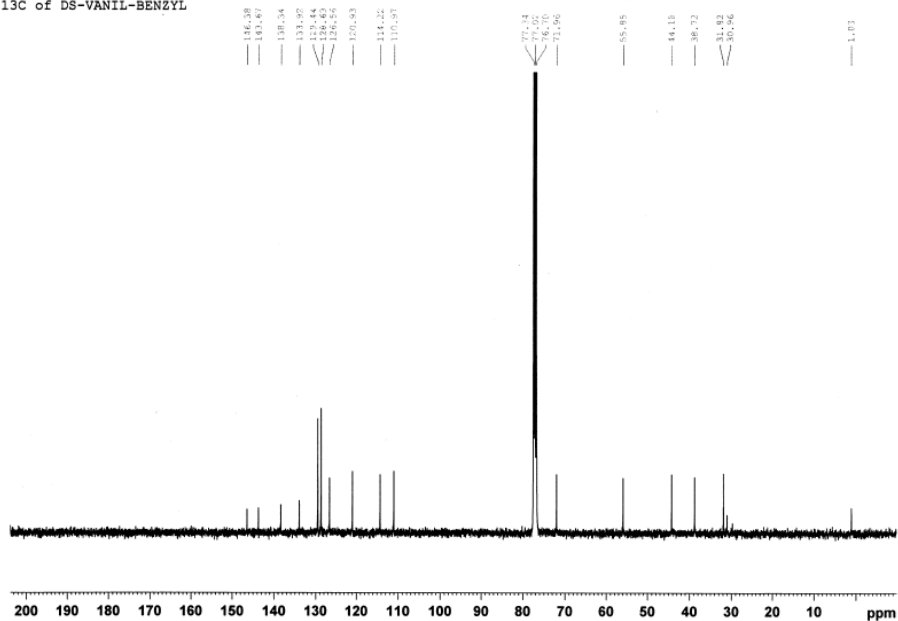

Supplement: c6ob01116k1.pdf [file c6ob01116k1.pdf]
